# Supplementary material for: Cycloaddition of di-substituted epoxides and CO2under ambient conditions catalysed by rare-earth poly(phenolate) complexes
Source: Royal Society of Chemistry journal article supplement (doi:10.1039/d2qi00592a), 2022-01-01
Supplement: d2qi00592a1.pdf [file d2qi00592a1.pdf]

## Supporting Information

### **Cycloaddition of di-substituted epoxides and CO<sub>2</sub> under ambient conditions catalysed by rare-earth poly(phenolate) complexes**

Yuting Qing, Tiantian Liu, Bei Zhao, Xiaoguang Bao,\* Dan Yuan\* and Yingming Yao\*

Key Laboratory of Organic Synthesis of Jiangsu Province, College of Chemistry, Chemical Engineering and Materials Science, Dushu Lake Campus, Soochow University, Suzhou 215123, People's Republic of China. E-mail: xgbao@suda.edu.cn; yuandan@suda.edu.cn; yaoym@suda.edu.cn;

## Contents

|                                                                                                           |    |
|-----------------------------------------------------------------------------------------------------------|----|
| 1. Experimental section.....                                                                              | 3  |
| General considerations.....                                                                               | 3  |
| Synthesis of ligand precursors $L^nH_3$ ( $n = 1-3$ ).....                                                | 3  |
| General procedures for the synthesis of rare-earth metal complexes. ....                                  | 5  |
| Typical procedures for cycloaddition reaction.....                                                        | 10 |
| Condition optimization for cycloaddition of $CO_2$ and CHO .....                                          | 12 |
| Reaction of $CO_2$ and di-substituted epoxides catalysed using $LaL^BTHF$ ( <b>b</b> ).....               | 12 |
| Characterization data of cyclic carbonates .....                                                          | 13 |
| 2. Structures and crystallographic data of complexes.....                                                 | 19 |
| Molecular structures of complexes .....                                                                   | 19 |
| Crystallographic data of the complexes.....                                                               | 20 |
| 3. Kinetic study of <i>cis</i> - <b>4d</b> formation from $CO_2$ and CHO catalysed by <b>1</b> /TBAI..... | 24 |
| Reaction order with respect to $P(CO_2)$ .....                                                            | 24 |
| Reaction order with respect to [CHO] .....                                                                | 24 |
| Reaction order with respect to [ <b>1</b> ].....                                                          | 25 |
| Reaction order with respect to [TBAI] .....                                                               | 28 |
| Eyring plot .....                                                                                         | 32 |
| 4. NMR spectra of ligand precursors, complexes and cyclic carbonates.....                                 | 35 |
| NMR spectra of ligand precursors .....                                                                    | 35 |
| NMR spectra of diamagnetic complexes .....                                                                | 38 |
| NMR spectra of cyclic carbonates .....                                                                    | 42 |
| 5. Computational details .....                                                                            | 55 |
| 6. References.....                                                                                        | 87 |

## 1. Experimental section

### General considerations

Synthesis of all complexes and cyclic carbonates were conducted under argon atmosphere using standard Schlenk techniques or in nitrogen-filled glove boxes. All commercially available epoxides were purchased from 3A Chemicals, Aladdin, Energy Chemical, Macklin or TCI and are > 98% pure. All liquid epoxides were desiccated with CaH<sub>2</sub> and distilled under argon atmosphere prior to usage. All solid compounds (*e.g.*, ligand precursors) were vacuum dried at 25 °C for two days. CO<sub>2</sub> was used as received. The solvents (*e.g.*, toluene, *n*-hexane, and tetrahydrofuran) were desiccated with sodium or CaH<sub>2</sub> for two days and distilled before use. X-ray crystallography data were collected using an Agilent Gemini Atlas or Bruker D8 QUEST CCD X-ray diffractometer. Data reduction was conducted through the Bruker APEX program, and the structures were solved and refined using the OLEX2 application. <sup>1</sup>H and <sup>13</sup>C NMR spectra were recorded on a Bruker Ascend 400 instrument or an Agilent DD2-600 spectrometer. Elemental analysis was performed on an Elementar Vario EL III analyzer. Infrared spectra were recorded on a ThermoFisher Nicolet 6700 spectrometer scanning the wavenumber range 400-4000 cm<sup>-1</sup> region.

### Synthesis of ligand precursors L<sup>n</sup>H<sub>3</sub> (n =1-3)

*N'*-(2-aminoethyl)-*N,N*-dimethyl-1,2-ethylenediamine (Me<sub>2</sub>N(CH<sub>2</sub>)<sub>2</sub>NH(CH<sub>2</sub>)<sub>2</sub>NH<sub>2</sub>, Me<sub>2</sub>NNN) (7.86 g, 11.4 mmol, 57%) was synthesized following a literature procedure.<sup>1</sup> <sup>1</sup>H NMR (400 MHz, C<sub>6</sub>D<sub>6</sub>) δ 2.61-2.56 (m, 2H, (CH<sub>2</sub>N(CH<sub>3</sub>)<sub>2</sub>), 2.54-2.50 (m, 2H, (CH<sub>3</sub>)<sub>2</sub>NCH<sub>2</sub>CH<sub>2</sub>), 2.49-2.44 (m, 2H, NHCH<sub>2</sub>), 2.27-2.21 (m, 2H, CH<sub>2</sub>NH<sub>2</sub>), 2.02 (s, 6H, N(CH<sub>3</sub>)<sub>2</sub>), 1.22 (s, 3H, NHCH<sub>2</sub>CH<sub>2</sub>NH<sub>2</sub>). <sup>13</sup>C NMR (101 MHz, C<sub>6</sub>D<sub>6</sub>) δ 59.1 (CH<sub>2</sub>N(CH<sub>3</sub>)<sub>2</sub>), 52.7 (NCH<sub>2</sub>CH<sub>2</sub>N(CH<sub>3</sub>)<sub>2</sub>), 47.1 (NHCH<sub>2</sub>), 45.4 (CH<sub>2</sub>NH<sub>2</sub>), 41.7 (N(CH<sub>3</sub>)<sub>2</sub>).

L<sup>1</sup>H<sub>3</sub> (R<sup>1</sup> = R<sup>2</sup> = *t*Bu). Ligand precursor L<sup>1</sup>H<sub>3</sub> was synthesized through Mannich reaction.<sup>2</sup> 2,4-di-*tert*-butylphenol (12.8 g, 62 mmol), paraformaldehyde (1.8 g, 60 mmol) and Me<sub>2</sub>NNN (2.6 g, 20 mmol) were placed in a 100 mL flask and heated at

90 °C for 3 days. After reaction, all volatiles were removed in vacuo. Crude products were purified through column chromatography using petroleum ether/ethyl acetate (93:7) as eluents. White solids were obtained after removal of all volatiles under vacuum (9.6 g, 12.2 mmol, 61%). <sup>1</sup>H NMR (400 MHz, C<sub>6</sub>D<sub>6</sub>) δ 9.10 (s, 3H, OH), 7.48 (d, *J* = 2.2 Hz, 1H, ArH), 7.45 (d, *J* = 2.2 Hz, 2H, ArH), 6.94 (d, *J* = 2.1 Hz, 2H, ArH), 6.92 (d, *J* = 2.1 Hz, 1H, ArH), 3.42 (s, 2H, ArCH<sub>2</sub>N), 3.38 (s, 4H, ArCH<sub>2</sub>N), 2.56 (d, *J* = 6.1 Hz, 2H, NCH<sub>2</sub>CH<sub>2</sub>N), 2.51 (d, *J* = 6.1 Hz, 2H, NCH<sub>2</sub>CH<sub>2</sub>N), 2.24 (t, *J* = 5.5 Hz, 2H, NCH<sub>2</sub>CH<sub>2</sub>N(CH<sub>3</sub>)<sub>2</sub>), 2.16 (t, *J* = 5.5 Hz, 2H, CH<sub>2</sub>N(CH<sub>3</sub>)<sub>2</sub>), 1.91 (s, 6H, N(CH<sub>3</sub>)<sub>2</sub>), 1.66 (s, 9H, C(CH<sub>3</sub>)<sub>3</sub>), 1.61 (s, 18H, C(CH<sub>3</sub>)<sub>3</sub>), 1.36 (s, 9H, C(CH<sub>3</sub>)<sub>3</sub>), 1.33 (s, 18H, C(CH<sub>3</sub>)<sub>3</sub>). <sup>13</sup>C NMR (101 MHz, CDCl<sub>3</sub>) δ 153.9, 152.4, 141.4, 140.4, 136.0, 125.0, 124.2, 123.5, 123.0, 121.6, 121.3 (Ar-C), 58.0, 57.3, 56.8 (ArCH<sub>2</sub>N), 51.4 (NCH<sub>2</sub>CH<sub>2</sub>N), 50.8 (NCH<sub>2</sub>CH<sub>2</sub>N), 50.7 (NCH<sub>2</sub>CH<sub>2</sub>N(CH<sub>3</sub>)<sub>2</sub>), 45.6 (CH<sub>2</sub>N(CH<sub>3</sub>)<sub>2</sub>), 34.9 (N(CH<sub>3</sub>)<sub>2</sub>), 34.8, 34.2 (C(CH<sub>3</sub>)<sub>3</sub>), 34.1, 31.7, 29.8, 29.6 (C(CH<sub>3</sub>)<sub>3</sub>).

**L<sup>2</sup>H<sub>3</sub> (R<sup>1</sup> = *t*-Bu, R<sup>2</sup> = CH<sub>3</sub>).** 2-*tert*-butyl-4-methylphenol (5.09 g, 31 mmol), paraformaldehyde (0.9 g, 30 mmol) and Me<sub>2</sub>NNN (1.30 g, 10 mmol) were placed in a 100 mL flask and heated at 90 °C for 3 days. After reaction, the crude product was washed with methanol (3 × 5 mL) to give white solids (5.6 g, 8.5 mmol, 85%). <sup>1</sup>H NMR (400 MHz, CDCl<sub>3</sub>) δ 6.99 (d, *J* = 1.6 Hz, 2H, ArH), 6.96 (d, *J* = 1.6 Hz, 1H, ArH), 6.71-6.68 (m, 2H, ArH), 6.62-6.60 (m, 1H, ArH), 3.65 (s, 2H, ArCH<sub>2</sub>N), 3.59 (s, 4H, ArCH<sub>2</sub>N), 2.75-2.70 (m, 2H, NCH<sub>2</sub>CH<sub>2</sub>N), 2.70-2.64 (m, 2H, NCH<sub>2</sub>CH<sub>2</sub>N), 2.48 (d, *J* = 5.6 Hz, 2H, NCH<sub>2</sub>CH<sub>2</sub>N(CH<sub>3</sub>)<sub>2</sub>), 2.43 (t, *J* = 5.8 Hz, 2H, CH<sub>2</sub>N(CH<sub>3</sub>)<sub>2</sub>), 2.22 (s, 6H, ArCH<sub>3</sub>), 2.21 (s, 3H, ArCH<sub>3</sub>), 2.14 (s, 6H, N(CH<sub>3</sub>)<sub>2</sub>), 1.38 (s, 18H, C(CH<sub>3</sub>)<sub>3</sub>), 1.36 (s, 9H, C(CH<sub>3</sub>)<sub>3</sub>). <sup>13</sup>C NMR (101 MHz, CDCl<sub>3</sub>) δ 153.9, 152.6, 136.8, 136.7, 128.8, 128.1, 127.9, 127.3, 127.0, 126.8, 122.0 (Ar-C), 57.5, 57.1, 56.9 (ArCH<sub>2</sub>N), 51.3 (NCH<sub>2</sub>CH<sub>2</sub>N), 50.6 (NCH<sub>2</sub>CH<sub>2</sub>N), 50.5 (NCH<sub>2</sub>CH<sub>2</sub>N(CH<sub>3</sub>)<sub>2</sub>), 45.6 (CH<sub>2</sub>N(CH<sub>3</sub>)<sub>2</sub>), 34.6 (N(CH<sub>3</sub>)<sub>2</sub>), 34.5 (C(CH<sub>3</sub>)<sub>3</sub>), 29.7, 29.6 (C(CH<sub>3</sub>)<sub>3</sub>), 20.82, 20.77 (Ar-CH<sub>3</sub>).

**L<sup>3</sup>H<sub>3</sub> (R<sup>1</sup> = R<sup>2</sup> = CH<sub>3</sub>).** 2,4-dimethylphenol (3.8 g, 31 mmol), paraformaldehyde (0.9 g, 30 mmol) and Me<sub>2</sub>NNN (1.3 g, 10 mmol) were placed in a 100 mL flask and heated at 90 °C for 3 days. After reaction, all volatiles were removed in vacuo. Crude products were purified through column chromatography using petroleum ether/ethyl

acetate (25:75) as eluents. White solids were obtained after removal of all volatiles in vacuum (2.6 g, 4.9 mmol, 49%).  $^1\text{H}$  NMR (400 MHz,  $\text{CDCl}_3$ )  $\delta$  6.84 (d,  $J = 8.5$  Hz, 3H, ArH), 6.68 (s, 2H, ArH), 6.56 (s, 1H, ArH), 3.66 (s, 4H, ArCH<sub>2</sub>N), 3.58 (s, 2H, ArCH<sub>2</sub>N), 2.83-2.77 (m, 2H, NCH<sub>2</sub>CH<sub>2</sub>N), 2.65 (d,  $J = 5.4$  Hz, 1H, NCH<sub>2</sub>CH<sub>2</sub>N), 2.63 (d,  $J = 6.5$  Hz, 1H, NCH<sub>2</sub>CH<sub>2</sub>N), 2.53 (s, 2H, NCH<sub>2</sub>CH<sub>2</sub>N(CH<sub>3</sub>)<sub>2</sub>), 2.42 (s, 2H, CH<sub>2</sub>N(CH<sub>3</sub>)<sub>2</sub>), 2.21 (s, 6H, N(CH<sub>3</sub>)<sub>2</sub>), 2.19 (s, 9H, ArCH<sub>3</sub>), 2.17 (s, 6H, ArCH<sub>3</sub>), 2.15 (s, 3H, ArCH<sub>3</sub>).  $^{13}\text{C}$  NMR (101 MHz,  $\text{CDCl}_3$ )  $\delta$  153.3, 152.2, 130.9, 130.7, 128.5, 128.3, 127.4, 127.2, 124.9, 124.4, 121.7, 121.1 (Ar-C), 57.6, 56.2, 55.5 (ArCH<sub>2</sub>N), 50.5 (NCH<sub>2</sub>CH<sub>2</sub>N), 49.5 (NCH<sub>2</sub>CH<sub>2</sub>N), 48.7(NCH<sub>2</sub>CH<sub>2</sub>N(CH<sub>3</sub>)<sub>2</sub>), 45.4 (CH<sub>2</sub>N(CH<sub>3</sub>)<sub>2</sub>), 31.6 (N(CH<sub>3</sub>)<sub>2</sub>), 22.7, 20.5, 15.9 (Ar-CH<sub>3</sub>).

### General procedures for the synthesis of rare-earth metal complexes.

**Synthesis of complex 1.** LaCp<sub>3</sub>(THF) (0.41 g, 1 mmol) and L<sup>1</sup>H<sub>3</sub> (0.79 g, 1 mmol) were dissolved with THF (10 mL), which was heated at 50 °C for 12 hours. After reaction, the solvent (THF) was removed under vacuum and the crude product was recrystallized from THF (3 mL). Colorless crystals were obtained at room temperature after 1 day (0.85 g, 0.86 mmol, 86%). Complex **1** is sensitive to air and moisture.

$^1\text{H}$  NMR (400 MHz, C<sub>6</sub>D<sub>6</sub>)  $\delta$  7.64 (d,  $J = 2.6$  Hz, 1H, ArH), 7.57 (d,  $J = 2.6$  Hz, 1H, ArH), 7.52 (d,  $J = 2.6$  Hz, 1H, ArH), 7.32 (d,  $J = 2.6$  Hz, 1H, ArH), 6.98 (d,  $J = 2.5$  Hz, 1H, ArH), 6.78 (d,  $J = 2.6$  Hz, 1H, ArH), 4.15 (d,  $J = 11.7$  Hz, 4H, THF), 4.06 (d,  $J = 12.9$  Hz, 1H, ArCH<sub>2</sub>N), 3.41-3.31 (m, 1H, ArCH<sub>2</sub>N), 2.92 (d,  $J = 12.7$  Hz, 1H, ArCH<sub>2</sub>N), 2.85 (d,  $J = 14.4$  Hz, 1H, ArCH<sub>2</sub>N), 2.75 (d,  $J = 14.0$  Hz, 1H, ArCH<sub>2</sub>N), 2.70 (s, 1H, ArCH<sub>2</sub>N), 2.10-2.00 (m, 2H, NCH<sub>2</sub>CH<sub>2</sub>N), 1.94-1.89 (m, 2H, NCH<sub>2</sub>CH<sub>2</sub>N), 1.87-1.86 (d,  $J = 5.2$  Hz, 1H, NCH<sub>2</sub>CH<sub>2</sub>N(CH<sub>3</sub>)<sub>2</sub>), 1.82-1.80 (d,  $J = 6.28$  Hz, 1H, NCH<sub>2</sub>CH<sub>2</sub>N(CH<sub>3</sub>)<sub>2</sub>), 1.78-1.77 (m, 2H, CH<sub>2</sub>N(CH<sub>3</sub>)<sub>2</sub>), 1.71 (s, 9H, C(CH<sub>3</sub>)<sub>3</sub>), 1.66 (s, 9H, C(CH<sub>3</sub>)<sub>3</sub>), 1.63 (s, 6H, N(CH<sub>3</sub>)<sub>2</sub>), 1.60 (d,  $J = 13.6$  Hz, 4H, THF), 1.55 (s, 9H, C(CH<sub>3</sub>)<sub>3</sub>), 1.52 (s, 9H, C(CH<sub>3</sub>)<sub>3</sub>), 1.44 (s, 9H, C(CH<sub>3</sub>)<sub>3</sub>), 1.39 (s, 9H, C(CH<sub>3</sub>)<sub>3</sub>).

$^{13}\text{C}$  NMR (101 MHz, C<sub>6</sub>D<sub>6</sub>)  $\delta$  163.5, 163.2, 161.0, 137.5, 135.9, 135.87, 135.0, 134.7, 134.6, 129.0, 128.2, 126.1, 125.8, 125.6, 125.3, 124.56, 123.7, 123.5, 123.4, 123.0

(Ar-C), 69.3 (THF), 62.2, 61.3, 59.7 (ArCH<sub>2</sub>N), 57.6 (NCH<sub>2</sub>CH<sub>2</sub>N), 51.8 (NCH<sub>2</sub>CH<sub>2</sub>N), 35.13 (NCH<sub>2</sub>CH<sub>2</sub>N(CH<sub>3</sub>)<sub>2</sub>), 35.05 (CH<sub>2</sub>N(CH<sub>3</sub>)<sub>2</sub>), 35.03 (N(CH<sub>3</sub>)<sub>2</sub>), 33.90, 33.85, 33.82 (C(CH<sub>3</sub>)<sub>3</sub>), 32.1, 32.01, 31.98, 30.2, 30.1, 29.8 (C(CH<sub>3</sub>)<sub>3</sub>), 25.4 (THF).

Anal. Calcd. for C<sub>61</sub>H<sub>102</sub>LaN<sub>3</sub>O<sub>4</sub> (complex **1**·Hex): C, 67.81; H, 9.52; N, 3.89. Found: C, 67.28; H, 9.17; N, 3.92.

IR (Selected absorbance, cm<sup>-1</sup>), stretching vibration of C-H bond (-CH<sub>2</sub>-, -CH<sub>3</sub>): 2949, 2901, 2839; in-plane bending vibration of C-H bond (-CH<sub>2</sub>-, -CH<sub>3</sub>, -C(CH<sub>3</sub>)<sub>3</sub>): 1470, 1365, 1201, 1166; stretching vibration of -Ar: 1437, 1412; stretching vibrations of C-N bond: 1302, 1276; stretching vibrations of C-O bond: 1240, 1133; Out-of-plane bending vibration of -Ar: 832, 809.

**Synthesis of complex 2.** NdCp<sub>3</sub>(THF) (0.41g, 1 mmol) and L<sup>1</sup>H<sub>3</sub> (0.79 g, 1 mmol) were dissolved with THF (10 mL), which was heated at 50 °C for 12 hours. After reaction, the solvent (THF) was removed under vacuum and the crude product was recrystallized from THF (2 mL). Purple crystals were obtained at room temperature after 2 h (0.83 g, 0.83 mmol, 83%). Complex **2** is sensitive to air and moisture.

Anal. Calcd. for C<sub>59</sub>H<sub>96</sub>N<sub>3</sub>NdO<sub>5</sub> (complex **2**·THF): C, 66.13; H, 9.03; N, 3.92. Found: C, 66.20; H, 9.43; N, 3.89.

IR (Selected absorbance, cm<sup>-1</sup>), stretching vibration of C-H bond (-CH<sub>2</sub>-, -CH<sub>3</sub>): 2950, 2901, 2865; in-plane bending vibration of C-H bond (-CH<sub>2</sub>-, -CH<sub>3</sub>, -C(CH<sub>3</sub>)<sub>3</sub>): 1468, 1384, 1202, 1166; stretching vibration of -Ar: 1437, 1413; stretching vibrations of C-N bond: 1361, 1301, 1278; stretching vibrations of C-O bond: 1241, 1134; Out-of-plane bending vibration of -Ar: 833, 809.

**Synthesis of complex 3.** SmCp<sub>3</sub>(THF) (0.42 g, 1 mmol) and L<sup>1</sup>H<sub>3</sub> (0.79 g, 1 mmol) were dissolved with toluene (10 mL), which was heated at 50 °C for 12 hours. After reaction, the solvent (toluene) was removed under vacuum and the crude product was recrystallized from toluene (3 mL) and *n*-hexane (2 mL). Colorless crystals were obtained at room temperature after 1 day (0.64 g, 0.64 mmol, 64%). Complex **3** is sensitive to air and moisture.

Anal. Calcd. for C<sub>61</sub>H<sub>102</sub>N<sub>3</sub>SmO<sub>4</sub> (complex **3**·Hex): C, 67.10; H, 9.42; N, 3.85. Found:

C, 66.96; H, 9.27; N, 3.95.

IR (Selected absorbance,  $\text{cm}^{-1}$ ), stretching vibration of C-H bond (-CH<sub>2</sub>-, -CH<sub>3</sub>): 2949, 2900, 2843; in-plane bending vibration of C-H bond (-CH<sub>2</sub>-, -CH<sub>3</sub>, -C(CH<sub>3</sub>)<sub>3</sub>): 1469, 1367, 1202, 1166; stretching vibration of -Ar: 1437, 1412; stretching vibrations of C-N bond: 1302, 1276; stretching vibrations of C-O bond: 1240, 1133; Out-of-plane bending vibration of -Ar: 833, 809.

**Synthesis of complex 4.** YCp<sub>3</sub>(THF) (0.36 g, 1 mmol) and L<sup>1</sup>H<sub>3</sub> (0.79 g, 1 mmol) were dissolved with THF (10 mL), which was heated at 50 °C for 12 hours. After reaction, the solvent (THF) was removed under vacuum and the crude product were recrystallized from THF (3 mL) and *n*-hexane (1 mL). Colorless crystals were obtained at room temperature after several days (0.52 g, 0.55 mmol, 55%). Complex **4** is sensitive to air and moisture.

<sup>1</sup>H NMR (400 MHz, C<sub>6</sub>D<sub>6</sub>)  $\delta$  7.60-7.53 (m, 3H, ArH), 7.18 (s, 1H, ArH), 7.00 (s, 1H, ArH), 6.76 (d, *J* = 2.4 Hz, 1H, ArH), 4.26 (d, *J* = 12.4 Hz, 1H, ArCH<sub>2</sub>N), 4.09-4.03 (m, 4H, THF), 2.85 (d, *J* = 12.5 Hz, 1H, ArCH<sub>2</sub>N), 2.48-2.27 (m, 3H, ArCH<sub>2</sub>N), 1.93 (s, 1H, ArCH<sub>2</sub>N), 1.81 (s, 6H, N(CH<sub>3</sub>)<sub>2</sub>), 1.78 (s, 9H, C(CH<sub>3</sub>)<sub>3</sub>), 1.74 (s, 1H, NCH<sub>2</sub>CH<sub>2</sub>N), 1.71 (d, *J* = 4.36 Hz, 1H, NCH<sub>2</sub>CH<sub>2</sub>N), 1.63 (s, 9H, C(CH<sub>3</sub>)<sub>3</sub>), 1.59 (s, 1H, NCH<sub>2</sub>CH<sub>2</sub>N), 1.57 (s, 1H, NCH<sub>2</sub>CH<sub>2</sub>N), 1.53 (s, 9H, C(CH<sub>3</sub>)<sub>3</sub>), 1.51 (s, 4H, THF), 1.50 (s, 2H, NCH<sub>2</sub>CH<sub>2</sub>N(CH<sub>3</sub>)<sub>2</sub>), 1.47 (s, 9H, C(CH<sub>3</sub>)<sub>3</sub>), 1.44 (s, 9H, C(CH<sub>3</sub>)<sub>3</sub>), 1.39 (s, 9H, C(CH<sub>3</sub>)<sub>3</sub>), 1.37 (s, 1H), CH<sub>2</sub>N(CH<sub>3</sub>)<sub>2</sub>, 1.34 (s, 1H, CH<sub>2</sub>N(CH<sub>3</sub>)<sub>2</sub>).

<sup>13</sup>C NMR (101 MHz, C<sub>6</sub>D<sub>6</sub>)  $\delta$  161.9, 160.7, 136.3, 136.1, 135.5, 135.3, 125.8, 125.5, 124.8, 124.7, 124.2, 124.1, 123.5, 123.1, 122.9 (Ar-C), 69.8 (THF), 63.5 (ArCH<sub>2</sub>N), 46.6 (N(CH<sub>3</sub>)<sub>2</sub>), 35.2 (NCH<sub>2</sub>CH<sub>2</sub>N), 35.10 (NCH<sub>2</sub>CH<sub>2</sub>N), 35.09 (NCH<sub>2</sub>CH<sub>2</sub>N(CH<sub>3</sub>)<sub>2</sub>), 33.9 (CH<sub>2</sub>N(CH<sub>3</sub>)<sub>2</sub>), 33.84, 33.77, 32.0 (C(CH<sub>3</sub>)<sub>3</sub>), 31.9, 31.8, 31.6, 30.6, 30.3, 30.2, 30.1 (C(CH<sub>3</sub>)<sub>3</sub>), 25.2, 22.7 (THF).

Anal. Calcd. for C<sub>62</sub>H<sub>105</sub>YN<sub>3</sub>O<sub>4</sub> (complex **4**·Hex): C, 71.23; H, 10.12; N, 4.02. Found: C, 71.15; H, 10.46; N, 3.84.

IR (Selected absorbance,  $\text{cm}^{-1}$ ), stretching vibration of C-H bond (-CH<sub>2</sub>-, -CH<sub>3</sub>): 2950, 2900, 2865; in-plane bending vibration of C-H bond (-CH<sub>2</sub>-, -CH<sub>3</sub>, -C(CH<sub>3</sub>)<sub>3</sub>): 1470, 1391, 1201, 1168; stretching vibration of -Ar: 1413, 1440; stretching vibrations of C-

N bond: 1361, 1305, 1277; stretching vibrations of C-O bond: 1238, 1132; Out-of-plane bending vibration of -Ar: 835, 806.

**Synthesis of complex 5.** LaCp<sub>3</sub>(THF) (0.41 g, 1 mmol) and L<sup>2</sup>H<sub>3</sub> (0.66 g, 1 mmol) were dissolved with toluene (10 mL), which was heated at 50 °C for 12 hours. After reaction, the solvent (toluene) was removed under vacuum and the crude product was recrystallized from toluene (3 mL) and *n*-hexane (1 mL). Colorless crystals were obtained at room temperature after 3 days (0.42 g, 0.48 mmol, 48%). Complex **5** is sensitive to air and moisture.

<sup>1</sup>H NMR (400 MHz, C<sub>6</sub>D<sub>6</sub>) δ 7.37-7.35 (m, 1H, ArH), 7.31-7.28 (m, 1H, ArH), 7.26-7.23 (m, 1H, ArH), 7.04 (s, 1H, ArH), 6.70-6.67 (m, 1H, ArH), 6.62-6.58 (m, 1H, ArH), 4.19-4.12 (m, 4H, THF), 4.11 (d, *J* = 3.6 Hz, 1H, ArCH<sub>2</sub>N), 4.08 (d, *J* = 5.4 Hz, 1H, ArCH<sub>2</sub>N), 3.31-3.20 (m, 1H, ArCH<sub>2</sub>N), 2.77 (d, *J* = 12.6 Hz, 2H, ArCH<sub>2</sub>N), 2.70 (d, *J* = 12.1 Hz, 1H, ArCH<sub>2</sub>N), 2.61 (d, *J* = 11.7 Hz, 1H, NCH<sub>2</sub>CH<sub>2</sub>), 2.49 (s, 3H, ArCH<sub>3</sub>), 2.36 (s, 3H, ArCH<sub>3</sub>), 2.33 (s, 3H, ArCH<sub>3</sub>), 2.23-2.19 (m, 1H, NCH<sub>2</sub>CH<sub>2</sub>), 2.02 (d, *J* = 12.3 Hz, 1H, NCH<sub>2</sub>CH<sub>2</sub>N), 1.95 (d, *J* = 11.8 Hz, 2H, NCH<sub>2</sub>CH<sub>2</sub>N and NCH<sub>2</sub>CH<sub>2</sub>N(CH<sub>3</sub>)<sub>2</sub>), 1.91 (d, *J* = 7.4 Hz, 2H, NCH<sub>2</sub>CH<sub>2</sub>N(CH<sub>3</sub>)<sub>2</sub>), 1.88 (s, 1H, CH<sub>2</sub>N(CH<sub>3</sub>)<sub>2</sub>), 1.66 (s, 9H, C(CH<sub>3</sub>)<sub>3</sub>), 1.62 (s, 9H, C(CH<sub>3</sub>)<sub>3</sub>), 1.61 (s, 6H, N(CH<sub>3</sub>)<sub>3</sub>), 1.56 (s, 9H, C(CH<sub>3</sub>)<sub>3</sub>), 1.48 (d, *J* = 14.4 Hz, 4H, THF).

<sup>13</sup>C NMR (101 MHz, C<sub>6</sub>D<sub>6</sub>) δ 163.5, 163.3, 161.1, 154.3, 152.7, 136.71, 136.5, 135.5, 135.4, 130.2, 130.0, 129.7, 129.0, 128.9, 128.2, 125.31, 125.0, 123.9, 123.5, 122.4, 122.2, 121.4, 121.1 (Ar-C), 69.1 (THF), 61.6, 60.9, 59.0 (ArCH<sub>2</sub>N), 57.8 (NCH<sub>2</sub>CH<sub>2</sub>N), 56.9 (NCH<sub>2</sub>CH<sub>2</sub>N), 56.7 (NCH<sub>2</sub>CH<sub>2</sub>N(CH<sub>3</sub>)<sub>2</sub>), 55.5 (CH<sub>2</sub>N(CH<sub>3</sub>)<sub>2</sub>), 51.7, 49.7, 45.0 (Ar-CH<sub>3</sub>), 34.8 (N(CH<sub>3</sub>)<sub>2</sub>), 34.73, 34.68, 34.6 (C(CH<sub>3</sub>)<sub>3</sub>), 30.2, 29.8, 29.7, 29.6 (C(CH<sub>3</sub>)<sub>3</sub>), 25.4 (THF).

Anal. Calcd. for C<sub>50</sub>H<sub>78</sub>LaN<sub>3</sub>O<sub>5</sub> (complex **5**·THF): C, 63.88; H, 8.36; N, 4.47. Found: C, 63.51; H, 8.75; N, 4.63.

IR (Selected absorbance, cm<sup>-1</sup>), stretching vibration of C-H bond (-CH<sub>2</sub>-, -CH<sub>3</sub>): 2999, 2948, 2911, 2856; in-plane bending vibration of C-H bond (-CH<sub>2</sub>-, -CH<sub>3</sub>, -C(CH<sub>3</sub>)<sub>3</sub>): 1467, 1373, 1207, 1148; stretching vibration of -Ar: 1434, 1416; stretching vibrations of C-N bond: 1363, 1303, 1279; stretching vibrations of C-O bond: 1207, 1148; Out-



of-plane bending vibration of -Ar: 860, 817.

**Synthesis of complex 6.** LaCp<sub>3</sub>(THF) (0.41 g, 1 mmol) and L<sup>3</sup>H<sub>3</sub> (0.53 g, 1 mmol) were dissolved with toluene (10 mL), which was heated at 50 °C for 12 hours. After reaction, the solvent (toluene) was removed under vacuum and the crude product was recrystallized from toluene (4.5 mL) and *n*-hexane (1.5 mL). Colorless crystals were obtained at room temperature after 3 days (0.63 g, 0.47 mmol, 47%). Complex **6** is sensitive to air and moisture.

<sup>1</sup>H NMR (400 MHz, C<sub>6</sub>D<sub>6</sub>) δ 7.03 (s, 2H, ArH), 6.97-6.95 (m, 2H, ArH), 6.84 (s, 2H, ArH), 6.76 (s, 2H, ArH), 6.62 (s, 2H, ArH), 6.41-6.37 (m, 2H, ArH), 5.09 (d, *J* = 11.7 Hz, 2H, ArCH<sub>2</sub>N), 4.38 (d, *J* = 11.7 Hz, 2H, ArCH<sub>2</sub>N), 3.39 (d, *J* = 11.9 Hz, 2H, ArCH<sub>2</sub>N), 3.25 (t, *J* = 13.6 Hz, 2H, ArCH<sub>2</sub>N), 3.03 (d, *J* = 12.3 Hz, 2H, ArCH<sub>2</sub>N), 2.97 (s, 6H, Ar-CH<sub>3</sub>), 2.92-2.83 (m, 2H, ArCH<sub>2</sub>N), 2.78 (d, *J* = 12.7 Hz, 2H, NCH<sub>2</sub>CH<sub>2</sub>), 2.73 (d, *J* = 12.0 Hz, 2H, NCH<sub>2</sub>CH<sub>2</sub>), 2.59 (s, 2H, NCH<sub>2</sub>CH<sub>2</sub>N), 2.54 (s, 6H, Ar-CH<sub>3</sub>), 2.28 (s, 6H, Ar-CH<sub>3</sub>), 2.26 (s, 12H, N(CH<sub>3</sub>)<sub>2</sub>), 2.18 (s, 6H, Ar-CH<sub>3</sub>), 2.16 (s, 2H, NCH<sub>2</sub>CH<sub>2</sub>N), 2.11 (s, 6H, Ar-CH<sub>3</sub>), 2.03 (s, 6H, Ar-CH<sub>3</sub>), 1.96 (d, *J* = 12.0 Hz, 2H, NCH<sub>2</sub>CH<sub>2</sub>N(CH<sub>3</sub>)<sub>2</sub>), 1.56 (s, 4H, NCH<sub>2</sub>CH<sub>2</sub>N(CH<sub>3</sub>)<sub>2</sub>), 1.31 (d, *J* = 12.8 Hz, 2H, CH<sub>2</sub>N(CH<sub>3</sub>)<sub>2</sub>).

<sup>13</sup>C NMR (101 MHz, C<sub>6</sub>D<sub>6</sub>) δ 163.0, 161.7, 156.7, 137.5, 132.8, 132.2, 131.6, 130.1, 129.2, 129.0, 128.2, 126.6, 125.3, 124.8, 124.7, 124.5, 123.6, 122.5, 121.7, 121.4 (Ar-C), 65.1 (ArCH<sub>2</sub>N), 61.4 (NCH<sub>2</sub>CH<sub>2</sub>N), 58.3 (NCH<sub>2</sub>CH<sub>2</sub>N), 55.2 (NCH<sub>2</sub>CH<sub>2</sub>N(CH<sub>3</sub>)<sub>2</sub>), 50.4 (CH<sub>2</sub>N(CH<sub>3</sub>)<sub>2</sub>), 44.65, N(CH<sub>3</sub>)<sub>2</sub>, 20.4, 20.3, 19.3, 19.03, 19.01, 17.36 (Ar-CH<sub>3</sub>).

Anal. Calcd. for C<sub>72</sub>H<sub>102</sub>La<sub>2</sub>N<sub>6</sub>O<sub>6</sub> (complex **6**·Hex): C, 60.67; H, 7.21; N, 5.90. Found: C, 60.62; H, 7.02; N, 6.07.

IR (Selected absorbance, cm<sup>-1</sup>), stretching vibration of C-H bond (-CH<sub>2</sub>-, -CH<sub>3</sub>): 2909, 2834; in-plane bending vibration of C-H bond (-CH<sub>2</sub>-, -CH<sub>3</sub>, -C(CH<sub>3</sub>)<sub>3</sub>): 1471, 1372, 1218, 1159; stretching vibration of -Ar: 1439; stretching vibrations of C-N bond: 1311, 1269, 1244; stretching vibrations of C-O bond: 1218, 1159; Out-of-plane bending vibration of -Ar: 858, 807.

## Typical procedures for cycloaddition reaction

**Condition screening.** 1,2-Epoxyhexane (700  $\mu$ L, 6.0 mmol), complex **1** (29.8 mg, 0.5 mol%) and TBAI (22.2 mg, 1.0 mol%) were added into a 5 mL reaction flask, which was connected to a CO<sub>2</sub> balloon (1 bar). After 12 h reaction at 25  $^{\circ}$ C, mesitylene (101.0 mg, 0.84 mmol) was added as an internal standard. The yield of the cyclic carbonate (4-butyl-1,3-dioxolane-2-one, **2a**) was determined by <sup>1</sup>H NMR spectroscopy of the reaction mixture with added mesitylene (Figure S1).<sup>3</sup>

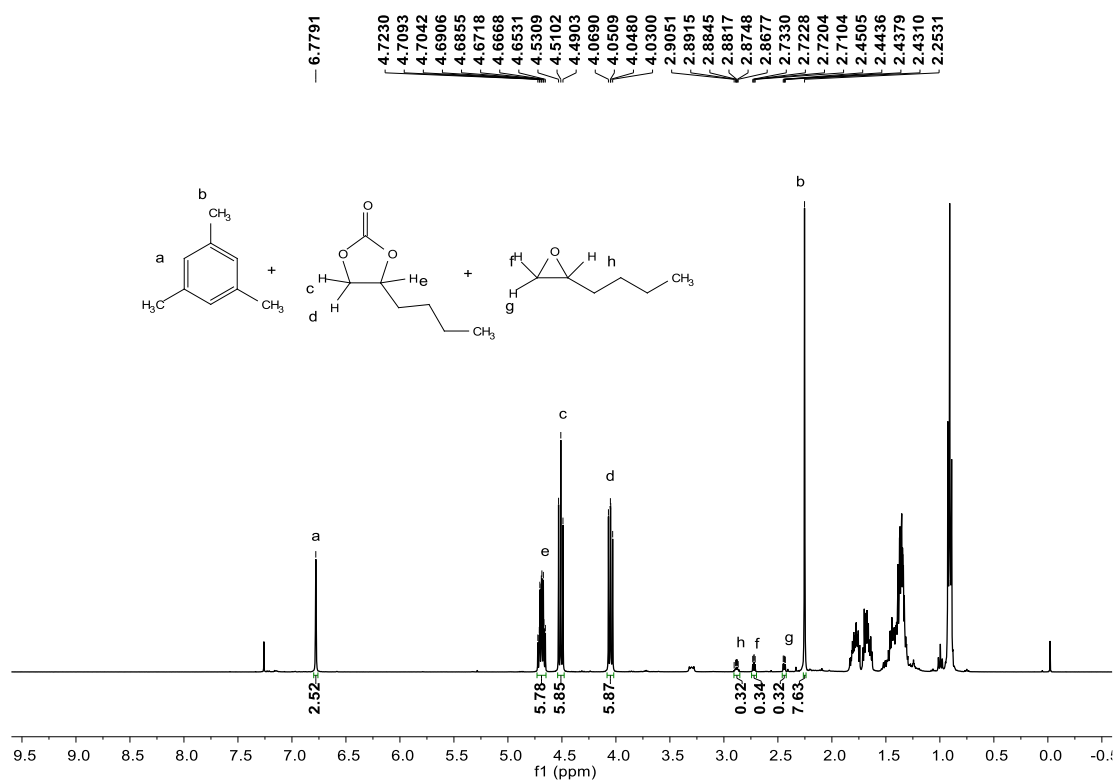

**Figure S1.** A representative <sup>1</sup>H NMR spectrum of reaction mixture of 1,2-epoxyhexane and CO<sub>2</sub> (Table 1, entry 1).

### Cycloaddition of CO<sub>2</sub> with mono-substituted epoxides

Procedure 1: mono-substituted epoxides **1a-r** (6.0 mmol), complex **1** (17.9 mg, 0.3 mol%) and TBAI (13.3 mg, 0.6 mol%) were added in a 5 mL reaction flask, which was connected to a CO<sub>2</sub> balloon (1 bar). After 18 h reaction at 25  $^{\circ}$ C, crude products were purified through column chromatography using petroleum ether/ethyl acetate (3:7 to 1:1) as eluents. After vacuum removal of all volatiles, the products **2a-r** were obtained.

## Comparison of this work with selected organometallic catalysts.

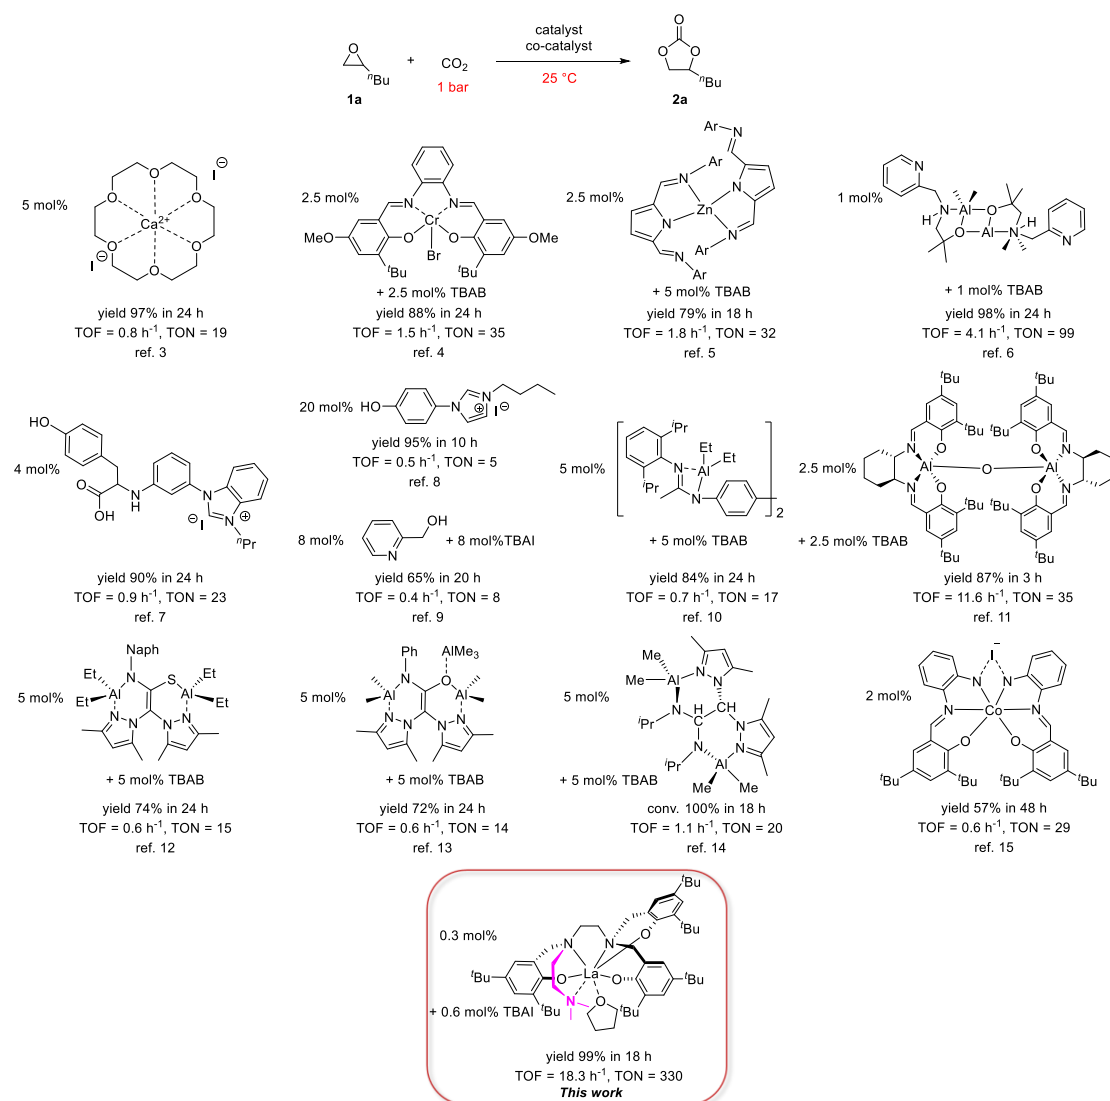

**Scheme S1** Reported catalysts for the formation of 4-butyl-1,3-dioxolan-2-one (**2a**) under 1 bar CO<sub>2</sub> and 25 °C.

### Cycloaddition of CO<sub>2</sub> with di-substituted epoxides

Procedure 2: di-substituted epoxides **3a-h** (3.0 mmol), complex **1** (59.7 mg, 2 mol%), and TBAI (44.3 mg, 4 mol%) were added in a 5 mL reaction flask, which was connected to a CO<sub>2</sub> balloon (1 bar). After 18-24 h reaction at 25 °C, crude products were purified through column chromatography using petroleum ether/ethyl acetate (3:7 to 1:1) as eluents. After removal of all volatiles in vacuo, products **4a-f** were obtained. Reactions of **3g** and **3h** required elevating the temperature to 120 °C to generate cyclic carbonates (**4g** and **4h**).

## Condition optimization for cycloaddition of CO<sub>2</sub> and CHO

**Table S1.** condition optimization <sup>a</sup>

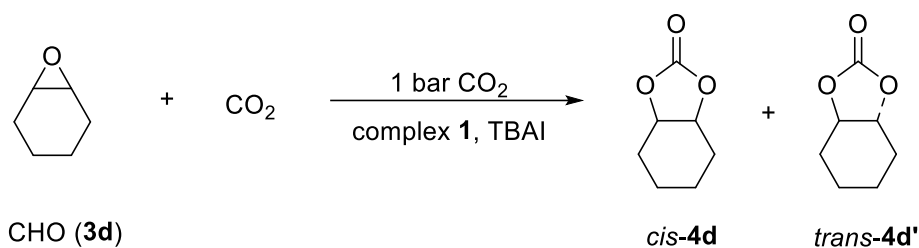

| Entry | Catalyst (mol%) | Co-catalyst (mol%) | Temp. (°C) | Time (h) | Yield (%) <sup>b,c</sup> | TOF (h <sup>-1</sup> ) |
|-------|-----------------|--------------------|------------|----------|--------------------------|------------------------|
| 1     | <b>1</b> (0.3)  | TBAI (0.6)         | 25         | 24       | 41                       | 5.7                    |
| 2     | <b>1</b> (0.3)  | TBAI (0.6)         | 60         | 24       | 73                       | 10.1                   |
| 3     | <b>1</b> (0.5)  | TBAI (1)           | 60         | 24       | 78                       | 6.5                    |
| 4     | <b>1</b> (1)    | TBAI (2)           | 60         | 24       | 86                       | 3.6                    |
| 5     | <b>1</b> (2)    | TBAI (2)           | 60         | 24       | 92                       | 1.9                    |
| 6     | <b>1</b> (2)    | TBAI (3)           | 60         | 24       | 95                       | 2.0                    |
| 7     | <b>1</b> (2)    | TBAI (4)           | 60         | 24       | 99                       | 2.1                    |
| 8     | <b>1</b> (2)    | TBAI (4)           | 60         | 18       | 96                       | 2.7                    |
| 9     | <b>1</b> (2)    | TBAI (4)           | 25         | 18       | 88                       | 2.4                    |
| 10    | <b>1</b> (2)    | TBAI (4)           | 25         | 24       | 94 (91 <sup>d</sup> )    | 2.0                    |
| 11    | <b>1</b> (2)    | --                 | 60         | 24       | 0                        | 0                      |
| 12    | --              | TBAI (4)           | 60         | 24       | 0                        | 0                      |

<sup>a</sup> Reaction conditions: 1 bar CO<sub>2</sub>. <sup>b</sup> Yield was determined by <sup>1</sup>H NMR spectroscopy using mesitylene as an internal standard. <sup>c</sup> 99% *cis* and 1% *trans* isomers. <sup>d</sup> Isolated yield.

## Reaction of CO<sub>2</sub> and di-substituted epoxides catalysed using LaL<sup>B</sup>THF (**b**)

**Table S2.** Conversion of di-substituted epoxides **3a-h** into cyclic carbonates **4a-h** using LaL<sup>B</sup>THF (**b**) and TBAI <sup>a,b</sup>

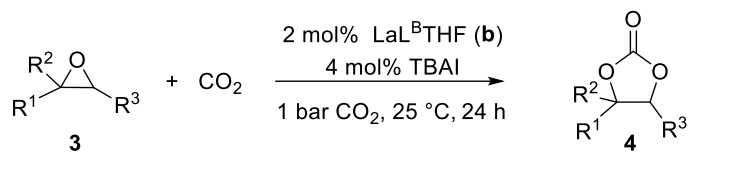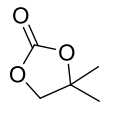

**4a**, 99%  
ref. 2

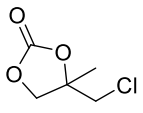

**4b**, 18%

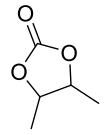

*cis*-**4c**, 91%  
*cis:trans* > 99:1

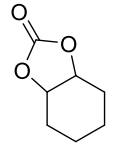

*cis*-**4d**, 14%  
*cis:trans* > 99:1

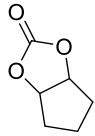

*cis*-**4e**, 11%  
*cis:trans* > 99:1

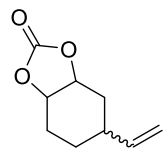

*cis*-**4f**, 23%  
*cis:trans* > 99:1

<sup>a</sup> Reaction conditions: 2 mol% LaL<sup>B</sup>THF (**b**), 4 mol% TBAI, 25 °C, 24 h, 1 bar CO<sub>2</sub> pressure, neat. <sup>b</sup> Isolated yield.

### Characterization data of cyclic carbonates

#### 4-butyl-1,3-dioxolan-2-one (**2a**).<sup>3</sup>

Following Procedure 1, 1,2-epoxyhexane **1a** (700 μL, 6.0 mmol) reacted with CO<sub>2</sub> and generated **2a** as light yellow liquid (856.5 mg, 5.94 mmol, 99%). <sup>1</sup>H NMR (400 MHz, CDCl<sub>3</sub>) δ 4.73-4.64 (m, 1H, OCH), 4.50 (d, *J* = 8.3 Hz, 1H, OCH<sub>2</sub>), 4.04 (t, *J* = 7.8 Hz, 1H, OCH<sub>2</sub>), 1.78 (d, *J* = 7.7 Hz, 1H, CH<sub>2</sub>), 1.71-1.61 (m, 1H, CH<sub>2</sub>), 1.47-1.40 (m, 1H, CH<sub>2</sub>), 1.40-1.36 (m, 1H, CH<sub>2</sub>), 1.35-1.30 (m, 2H, CH<sub>2</sub>), 0.90 (t, *J* = 6.4 Hz, 3H, CH<sub>3</sub>).

#### 4-ethyl-1,3-dioxolan-2-one (**2b**).<sup>3</sup>

Following Procedure 1, 1,2-epoxybutane **1b** (522 μL, 6.0 mmol) reacted with CO<sub>2</sub> and generated **2b** as light yellow liquid (689.7 mg, 5.94 mmol, 99%). <sup>1</sup>H NMR (400 MHz, CDCl<sub>3</sub>) δ 4.65-4.56 (m, 1H, OCH), 4.46 (t, *J* = 8.2 Hz, 1H, OCH<sub>2</sub>), 4.01 (m, 1H, OCH<sub>2</sub>), 1.70 (m, 2H, CH<sub>2</sub>), 0.93 (t, *J* = 7.5 Hz, 3H, CH<sub>3</sub>).

#### 4-decylalkyl-1,3-dioxolan-2-one (**2c**).<sup>16</sup>

Following Procedure 1, 1,2-epoxydodecane **1c** (1318 μL, 6.0 mmol) reacted with CO<sub>2</sub> and generated **2c** as light yellow liquid (1356.3 mg, 5.97 mmol, 99%). <sup>1</sup>H NMR (400

MHz, CDCl<sub>3</sub>) δ 4.64 (m, 1H, OCH), 4.52-4.39 (m, 1H, OCH<sub>2</sub>), 4.00 (dd, *J* = 8.4 and 7.2 Hz, 1H, OCH<sub>2</sub>), 1.81-1.67 (m, 1H, CH<sub>2</sub>), 1.66-1.55 (m, 1H, CH<sub>2</sub>), 1.40 (m, 1H, CH<sub>2</sub>), 1.34-1.15 (m, 15H, CH<sub>2</sub>), 0.81 (t, *J* = 6.9 Hz, 3H, CH<sub>3</sub>).

4-methyl-1,3-dioxolan-2-one (**2d**).<sup>3</sup>

Following Procedure 1, 1,2-epoxypropane **1d** (420 μL, 6.0 mmol) reacted with CO<sub>2</sub> and generated **2d** as light yellow liquid (606.4 mg, 2.97 mmol, 99%). <sup>1</sup>H NMR (400 MHz, CDCl<sub>3</sub>) δ 4.85 (dd, *J* = 13.6 and 6.5 Hz, 1H, OCH), 4.56 (t, *J* = 8.1 Hz, 1H, OCH<sub>2</sub>), 4.06-3.96 (m, 1H, OCH<sub>2</sub>), 1.48 (d, *J* = 6.3 Hz, 3H, CH<sub>3</sub>).

4-(3-butenyl)-1,3-dioxolan-2-one (**2e**).<sup>17</sup>

Following Procedure 1, 1,2-epoxy-5-hexene **1e** (676 μL, 6.0 mmol) reacted with CO<sub>2</sub> and generated **2e** as light yellow liquid (844.4 mg, 2.97 mmol, 99%). <sup>1</sup>H NMR (400 MHz, CDCl<sub>3</sub>) δ 5.72 (m, 6.7 Hz, 1H, CH=CH<sub>2</sub>), 5.06-4.93 (m, 2H, CH=CH<sub>2</sub>), 4.68 (m, 1H, OCH), 4.51-4.44 (m, 1H, OCH<sub>2</sub>), 4.02 (dd, *J* = 8.5 and 7.2 Hz, 1H, OCH<sub>2</sub>), 2.22-2.05 (m, 2H, CH<sub>2</sub>CH<sub>2</sub>), 1.84 (m, 1H, CH<sub>2</sub>CH<sub>2</sub>), 1.72 (m, 1H, CH<sub>2</sub>CH<sub>2</sub>).

4-chloromethyl-1,3-dioxolan-2-one (**2f**).<sup>3</sup>

Following Procedure 1, epichlorohydrin **1f** (470 μL, 6.0 mmol) reacted with CO<sub>2</sub> and generated **2f** as light yellow liquid (704.5 mg, 5.16 mmol, 86%). <sup>1</sup>H NMR (400 MHz, CDCl<sub>3</sub>) δ 5.02-4.93 (m, 1H, OCH), 4.58 (t, *J* = 8.6 Hz, 1H, OCH<sub>2</sub>), 4.39 (dd, *J* = 8.9 and 5.7 Hz, 1H, OCH<sub>2</sub>), 3.79 (dd, *J* = 12.2 and 5.2 Hz, 1H, ClCH<sub>2</sub>), 3.71 (dd, *J* = 12.2 and 3.7 Hz, 1H, ClCH<sub>2</sub>).

4-bromomethyl-1,3-dioxolan-2-one (**2g**).<sup>18</sup>

Following Procedure 1, epibromohydrin **1g** (492 μL, 6.0 mmol) reacted with CO<sub>2</sub> and generated **2g** as light yellow liquid (1075.1 mg, 5.94 mmol, 99%). <sup>1</sup>H NMR (400 MHz, CDCl<sub>3</sub>) δ 4.94 (m, 1H, OCH), 4.56 (t, *J* = 8.6 Hz, 1H, OCH<sub>2</sub>), 4.29 (dd, *J* = 8.9 and 5.9 Hz, 1H, OCH<sub>2</sub>), 3.63-3.51 (m, 2H, BrCH<sub>2</sub>).

4-phenyl-1,3-dioxolan-2-one (**2h**).<sup>3</sup>

Following Procedure 1, styrene oxide **1h** (684 μL, 6.0 mmol) reacted with CO<sub>2</sub> and generated **2h** as white solids (788.0 mg, 4.80 mmol, 80%). <sup>1</sup>H NMR (400 MHz, CDCl<sub>3</sub>) δ 7.47-7.40 (m, 3H, ArH), 7.38-7.33 (t, *J* = 7.4 Hz, 2H, ArH), 5.67 (t, *J* = 8.0 Hz, 1H, OCH), 4.83-4.76 (m, 1H, OCH<sub>2</sub>), 4.33 (dd, *J* = 8.6 and 7.9 Hz, 1H, OCH<sub>2</sub>).

4-(methoxymethyl)-1,3-dioxolan-2-one (**2i**).<sup>17</sup>

Following Procedure 1, methyl glycidyl ether **1i** (540  $\mu$ L, 6.0 mmol) reacted with CO<sub>2</sub> and generated **2i** as light yellow liquid (650.0 mg, 4.92 mmol, 82%). <sup>1</sup>H NMR (400 MHz, CDCl<sub>3</sub>)  $\delta$  4.78 (m, 1H, OCH), 4.45 (t,  $J$  = 8.4 Hz, 1H, OCH<sub>2</sub>), 4.31 (dd,  $J$  = 8.4 and 6.1 Hz, 1H, OCH<sub>2</sub>), 3.59 (dd,  $J$  = 11.2 and 3.4 Hz, 1H, OCHCH<sub>2</sub>O), 3.50 (dd,  $J$  = 11.2 and 3.8 Hz, 1H, OCHCH<sub>2</sub>O), 3.35 (s, 3H, OCH<sub>3</sub>).

4-(*n*-butoxymethyl)-1,3-dioxolan-2-one (**2j**).<sup>17</sup>

Following Procedure 1, *n*-butyl glycidyl ether **1j** (828  $\mu$ L, 6.0 mmol) reacted with CO<sub>2</sub> and generated **2j** as light yellow liquid (951.1 mg, 5.46 mmol, 91%). <sup>1</sup>H NMR (400 MHz, CDCl<sub>3</sub>)  $\delta$  4.79 (m, 1H, OCH), 4.48 (t,  $J$  = 8.3 Hz, 1H, OCH<sub>2</sub>), 4.38 (dd,  $J$  = 8.3 and 6.1 Hz, 1H, OCH<sub>2</sub>), 3.66 (dd,  $J$  = 11.0 and 4.0 Hz, 1H, OCHCH<sub>2</sub>O), 3.60 (dd,  $J$  = 11.0 and 3.7 Hz, 1H, OCHCH<sub>2</sub>O), 3.50 (t,  $J$  = 6.5 Hz, 2H, OCH<sub>2</sub>CH<sub>2</sub>), 1.55 (p,  $J$  = 6.6 Hz, 2H, OCH<sub>2</sub>CH<sub>2</sub>), 1.35 (h,  $J$  = 7.3 Hz, 2H, CH<sub>2</sub>CH<sub>2</sub>), 0.91 (t,  $J$  = 7.4 Hz, 3H, CH<sub>3</sub>).

4-((allyloxy)methyl)-1,3-dioxolan-2-one (**2k**).<sup>16</sup>

Following Procedure 1, ((2-propenyloxy)-methyl) oxirane **1k** (712  $\mu$ L, 6.0 mmol) reacted with CO<sub>2</sub> and generated **2k** as light yellow liquid (816.1 mg, 5.16 mmol, 86%). <sup>1</sup>H NMR (400 MHz, CDCl<sub>3</sub>)  $\delta$  5.84 (m, 1H, CH=CH<sub>2</sub>), 5.22 (dd,  $J$  = 26.8 and 13.8 Hz, 2H, CH=CH<sub>2</sub>), 4.80 (m, 1H, OCH), 4.52-4.33 (m, 2H, OCH<sub>2</sub>), 4.02 (d,  $J$  = 5.5 Hz, 2H, OCH<sub>2</sub>), 3.69-3.56 (m, 2H, OCH<sub>2</sub>).

4-((prop-2-yn-1-yloxy) methyl)-1,3-dioxolan-2-one(**2l**).<sup>3</sup>

Following Procedure 1, 2-((prop-2-yn-1-yloxy)methyl)oxirane **1l** (646  $\mu$ L, 6.0 mmol) reacted with CO<sub>2</sub> and generated **2l** as light yellow liquid (571.5 mg, 3.66 mmol, 61%). <sup>1</sup>H NMR (400 MHz, CDCl<sub>3</sub>)  $\delta$  4.88-4.79 (m, 1H, OCH), 4.48 (t,  $J$  = 8.5 Hz, 1H, OCH<sub>2</sub>), 4.34 (dd,  $J$  = 8.4 and 6.0 Hz, 1H, OCH<sub>2</sub>), 4.25-4.11 (m, 2H, CH<sub>2</sub>O), 3.79-3.63 (m, 2H, CH<sub>2</sub>C), 2.48 (t,  $J$  = 2.4 Hz, 1H, C $\equiv$ CH).

4-((phenyl-2-ylmethoxy) methyl)-1,3-dioxolan-2-one (**2m**).<sup>16</sup>

Following Procedure 1, 2-(benzyloxymethyl) oxirane **1m** (914  $\mu$ L, 6.0 mmol) reacted with CO<sub>2</sub> and generated **2m** as light yellow liquid (824.5 mg, 3.96 mmol, 66%). <sup>1</sup>H NMR (400 MHz, CDCl<sub>3</sub>)  $\delta$  7.37-7.22 (m, 5H, ArH), 4.75 (m, 1H, OCH), 4.61-4.48 (m,

2H, OCH<sub>2</sub>), 4.44-4.26 (m, 2H, OCHCH<sub>2</sub>O), 3.66 (dd, *J* = 11.1 and 3.4 Hz, 1H, OCH<sub>2</sub>Ar), 3.54 (dd, *J* = 11.1 and 3.7 Hz 1H, OCH<sub>2</sub>Ar).

4-(phoxymethyl)-1,3-dioxolan-2-one (**2n**).<sup>17</sup>

Following Procedure 1, glycidyl phenyl ether **1n** (812 μL, 6.0 mmol) reacted with CO<sub>2</sub> and generated **2n** as white solids (745.7 mg, 3.84 mmol, 64%). <sup>1</sup>H NMR (400 MHz, CDCl<sub>3</sub>) δ 7.35-7.27 (m, 2H, ArH), 7.01 (t, *J* = 7.4 Hz, 1H, ArH), 6.94-6.87 (m, 2H, ArH), 5.02 (m, 1H, OCH), 4.60 (t, *J* = 8.4 Hz, 1H, OCH<sub>2</sub>), 4.52 (dd, *J* = 8.5 and 5.9 Hz, 1H, OCH<sub>2</sub>), 4.23 (dd, *J* = 10.6 and 4.1 Hz, 1H, CHCH<sub>2</sub>OPh), 4.13 (dd, *J* = 10.6 and 3.6 Hz, 1H, CHCH<sub>2</sub>OPh).

(2-oxo-1,3-dioxolan-4-yl)-methyl 4-(*tert*-butyl) benzoate (**2o**).<sup>17</sup>

Following Procedure 1, 4-*tert*-butylbenzoic acid 2,3-epoxypropyl ester **1o** (1302 μL, 6.0 mmol) reacted with CO<sub>2</sub> and generated **2o** as light yellow liquid (834.9 mg, 3 mmol, 50%). <sup>1</sup>H NMR (400 MHz, CDCl<sub>3</sub>) δ 7.96 (d, *J* = 8.5 Hz, 2H, ArH), 7.48 (d, *J* = 8.5 Hz, 2H, ArH), 5.08-4.99 (m, 1H, OCH), 4.65-4.55 (m, 2H, OCH<sub>2</sub>), 4.52 (dd, *J* = 12.6 and 3.8 Hz, 1H, OCH<sub>2</sub>), 4.42 (dd, *J* = 8.7 and 5.6 Hz, 1H, OCH<sub>2</sub>), 1.34 (s, 9H, C(CH<sub>3</sub>)<sub>3</sub>).

4,4-(butane-1,4-diyl)-bis-1,3-dioxolan-2-one (**2p**).<sup>17</sup>

Following Procedure 1, 1,2,7,8-diepoxyoctane **1p** (856 μL, 6.0 mmol) reacted with CO<sub>2</sub> and generated **2p** as generate light yellow liquid (994.5 mg, 4.32 mmol, 72%). <sup>1</sup>H NMR (400 MHz, CDCl<sub>3</sub>) δ 4.70 (m, 2H, OCH), 4.53 (t, *J* = 8.1 Hz, 2H, OCH<sub>2</sub>), 4.06 (t, *J* = 7.8 Hz, 2H, OCH<sub>2</sub>), 1.85-1.66 (m, 4H, CH<sub>2</sub>CH<sub>2</sub>), 1.51 (m, 4H, CH<sub>2</sub>CH<sub>2</sub>).

4-(7-oxabicyclo[4.1.0]heptan-3-yl)-1,3-dioxolan-2-one (**2q**).<sup>3</sup>

Following Procedure 1, 1,2-epoxy-2-(epoxyethyl) cyclohexane **1q** (768 μL, 6.0 mmol) reacted with CO<sub>2</sub> and generated **2q** as light yellow liquid (862.0 mg, 4.68 mmol, 78%). <sup>1</sup>H NMR (400 MHz, CDCl<sub>3</sub>) δ 4.47-4.29 (m, 2H, OCH<sub>2</sub>), 4.05 (m, 1H, OCH), 3.13-2.98 (m, 2H, OCH), 2.20-1.89 (m, 2H, OCHCH<sub>2</sub>), 1.76-1.64 (m, 1H, OCHCH<sub>2</sub>), 1.55 (m, 1H, OCHCH<sub>2</sub>), 1.49-1.36 (m, 1H, OCHCH<sub>2</sub>), 1.30-0.92 (m, 2H, CH<sub>2</sub>CH<sub>2</sub>).

4-(morpholinomethyl)-1,3-dioxolan-2-one (**2r**).<sup>3</sup>

Following Procedure 1, 4-(oxiran-2-ylmethyl) morpholine **1r** (820 μL, 6.0 mmol) reacted with CO<sub>2</sub> and generated **2r** as light yellow liquid (988.4 mg, 5.28 mmol, 88%).



$^1\text{H}$  NMR (400 MHz,  $\text{CDCl}_3$ )  $\delta$  4.79 (dt,  $J = 12.8$  and  $5.7$  Hz, 1H, OCH), 4.50 (t,  $J = 8.3$  Hz, 1H, OCH<sub>2</sub>), 4.25-4.17 (m, 1H, OCH<sub>2</sub>), 3.65 (t,  $J = 4.6$  Hz, 4H, OCH<sub>2</sub>CH<sub>2</sub>N), 2.64 (d,  $J = 5.6$  Hz, 2H, CH<sub>2</sub>), 2.52 (h,  $J = 7.0$  Hz, 4H, OCH<sub>2</sub>CH<sub>2</sub>N).

4,4-dimethyl-1,3-dioxolan-2-one (**4a**).<sup>3</sup>

Following Procedure 2, 2,2-dimethyloxirane **3a** (266  $\mu\text{L}$ , 3.0 mmol) reacted with  $\text{CO}_2$  and generated **4a** as light yellow liquid (344.8 mg, 2.97 mmol, 99%).  $^1\text{H}$  NMR (400 MHz,  $\text{CDCl}_3$ )  $\delta$  4.14 (s, 2H, OCH<sub>2</sub>), 1.52 (s, 6H, CH<sub>3</sub>).

4-(chloromethyl)-4-methyl-1,3-dioxolan-2-one (**4b**).<sup>3</sup>

Following Procedure 2, 2-(chloromethyl)-2-methyloxirane **3b** (290  $\mu\text{L}$ , 6.0 mmol) reacted with  $\text{CO}_2$  and generated **4b** as light yellow liquid (370.4 mg, 2.46 mmol, 82%).  $^1\text{H}$  NMR (400 MHz,  $\text{CDCl}_3$ )  $\delta$  4.50 (d,  $J = 8.8$  Hz, 1H, OCH<sub>2</sub>), 4.15 (d,  $J = 8.8$  Hz, 1H, OCH<sub>2</sub>), 3.72 (d,  $J = 11.9$  Hz, 1H, CH<sub>2</sub>Cl), 3.59 (d,  $J = 11.9$  Hz, 1H, CH<sub>2</sub>Cl), 1.61 (s, 3H, CH<sub>3</sub>).

*cis*-4,5-dimethyl-1,3-dioxolan-2-one (*cis*-**4c**).<sup>3</sup>

Following Procedure 2, *cis*-2,3-dimethyloxirane **3c** (262  $\mu\text{L}$ , 3.0 mmol) reacted with  $\text{CO}_2$  and generated *cis*-**4c** as light yellow liquid (334.4 mg, 2.88 mmol, 99%).  $^1\text{H}$  NMR (400 MHz,  $\text{CDCl}_3$ )  $\delta$  4.82 (m, 2H, OCH), 1.35-1.31 (m, 6H, CH<sub>3</sub>).

*cis*-cyclohexene carbonate (*cis*-**4d**).<sup>3</sup>

Following Procedure 2, cyclohexene oxide (**3d**) (305  $\mu\text{L}$ , 3.0 mmol) reacted with  $\text{CO}_2$  and generated *cis*-**4d** as light yellow liquid (387.8 mg, 2.73 mmol, 91%).  $^1\text{H}$  NMR (400 MHz,  $\text{CDCl}_3$ )  $\delta$  4.64 (m, 2H, OCH), 1.83 (m, 4H, CH<sub>2</sub>CH<sub>2</sub>), 1.60-1.49 (m, 2H, CH<sub>2</sub>CH<sub>2</sub>), 1.42-1.32 (m, 2H, CH<sub>2</sub>CH<sub>2</sub>).

*cis*-tetrahydro-8H-cyclopenta-1,3-dioxol-2-one (*cis*-**4e**).<sup>3</sup>

Following Procedure 2, cyclopentene oxide **3e** (262  $\mu\text{L}$ , 3.0 mmol) reacted with  $\text{CO}_2$  and generated *cis*-**4e** as light yellow liquid (326.7 mg, 2.55 mmol, 85%).  $^1\text{H}$  NMR (400 MHz,  $\text{CDCl}_3$ )  $\delta$  5.09 (s, 2H, OCH), 2.13 (dd,  $J = 14.2$  and  $5.1$  Hz, 2H, OCHCH<sub>2</sub>CH<sub>2</sub>), 1.82-1.60 (m, 4H, CH<sub>2</sub>CH<sub>2</sub>).

*cis*-5-vinylhexahydrobenzo[d][1,3]dioxol-2-one (*cis*-**4f**).<sup>3</sup>

Following Procedure 2, 3-vinyl-7-oxabicyclo-[4.1.0]heptane **3f** (391  $\mu\text{L}$ , 3.0 mmol) reacted with  $\text{CO}_2$  and generated *cis*-**4f** as light yellow liquid (449.1 mg, 2.67 mmol,

89%). <sup>1</sup>H NMR (400 MHz, CDCl<sub>3</sub>) δ 5.75-5.62 (m, 1H, CH=CH<sub>2</sub>), 5.03-4.91 (m, 2H, CH=CH<sub>2</sub>), 4.78-4.60 (m, 2H, OCH), 2.30-2.19 (m, 1H, CH-CH=CH<sub>2</sub>), 2.18-2.06 (m, 1H, OCHCH<sub>2</sub>), 1.79-1.69 (m, 1H, OCHCH<sub>2</sub>), 1.65-1.49 (m, 2H, OCHCH<sub>2</sub>), 1.41-1.28 (m, 1H, CH<sub>2</sub>CH<sub>2</sub>), 1.23-1.09 (m, 1H, CH<sub>2</sub>CH<sub>2</sub>).

*trans*-4,5-diphenyl-1,3-dioxolan-2-one (*trans*-**4g**).<sup>3</sup>

Following Procedure 2, *trans* stilbene oxide **3g** (589 mg, 3.0 mmol) reacted with CO<sub>2</sub> and generated *trans*-**4e** as white solids (468.5 mg, 1.95 mmol, 65%). <sup>1</sup>H NMR (400 MHz, CDCl<sub>3</sub>) δ 7.40-7.37 (m, 5H, ArH), 7.26 (m, 5H, ArH), 5.39 (s, 2H, OCH).

*cis*-tetrahydro-4H-cyclopenta[d][1,3]dioxol-2-one (*cis*-**4h**).<sup>3</sup>

Following Procedure 2, 3,6-dioxabicyclo[3.1.0]hexane **3h** (209 μL, 3.0 mmol) reacted with CO<sub>2</sub> and generated *cis*-**4h** as light yellow liquid (386.4 mg, 2.97 mmol, 99%). <sup>1</sup>H NMR (400 MHz, CDCl<sub>3</sub>) δ 5.20 (dd, *J* = 2.1 and 1.2 Hz, 2H, OCH), 4.27-4.22 (m, 2H, OCH<sub>2</sub>), 3.59-3.51 (m, 2H, OCH<sub>2</sub>).

## 2. Structures and crystallographic data of complexes

### Molecular structures of complexes

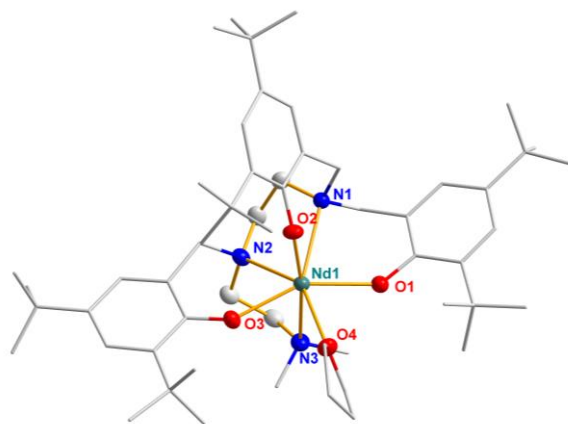

**Figure S2.** Solid state structure of complex **2·2 THF**. Thermal ellipsoids are drawn at the 50% probability level, and hydrogen atoms and solvent molecules are omitted for clarity.

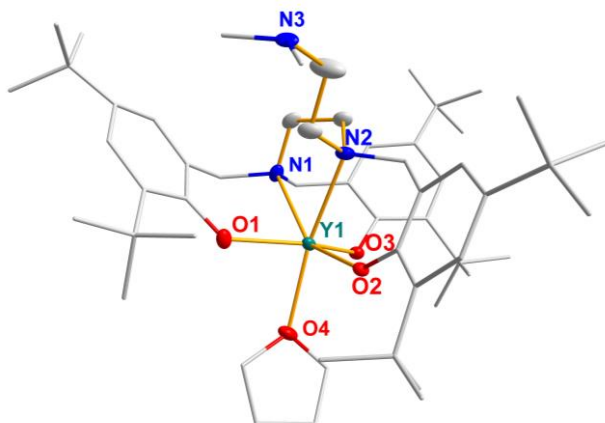

**Figure S3.** Solid state structure of complex **4**. Thermal ellipsoids are drawn at the 50% probability level, and hydrogen atoms and solvent molecules are omitted for clarity.

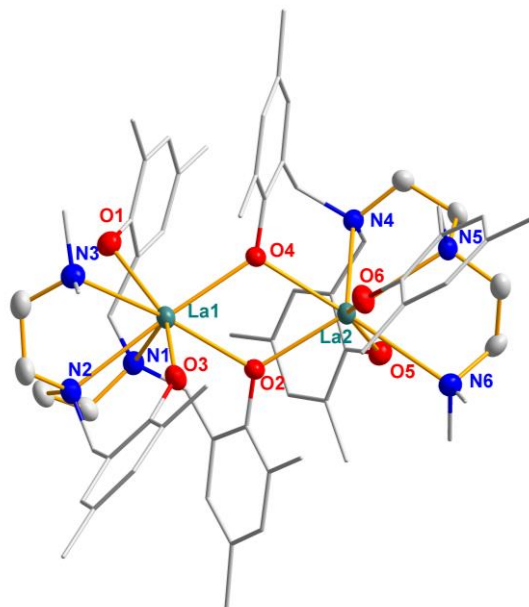

**Figure S4.** Solid state structure of complex **6**·2.5 toluene. Thermal ellipsoids are drawn at the 50% probability level, and hydrogen atoms and solvent molecules are omitted for clarity.

### Crystallographic data of the complexes

**Table S3.** Crystallographic data of complexes

| Complexes                           | <b>1</b> · 5THF                                                  | <b>2</b> · 2THF                                                  | <b>4</b>                                                        | <b>6</b> · 2.5Toluene                                                         |
|-------------------------------------|------------------------------------------------------------------|------------------------------------------------------------------|-----------------------------------------------------------------|-------------------------------------------------------------------------------|
| Empirical formula                   | C <sub>75</sub> H <sub>128</sub> LaN <sub>3</sub> O <sub>9</sub> | C <sub>63</sub> H <sub>104</sub> N <sub>3</sub> NdO <sub>6</sub> | C <sub>55</sub> H <sub>88</sub> N <sub>3</sub> O <sub>4</sub> Y | C <sub>66</sub> H <sub>88</sub> La <sub>2</sub> N <sub>6</sub> O <sub>6</sub> |
| Formula weight                      | 1354.71                                                          | 1143.73                                                          | 944.19                                                          | 1339.24                                                                       |
| Temperature/K                       | 119.97                                                           | 296.15                                                           | 120.04                                                          | 296.15                                                                        |
| Crystal system                      | monoclinic                                                       | monoclinic                                                       | triclinic                                                       | orthorhombic                                                                  |
| Space group                         | P2 <sub>1</sub> /n                                               | P2 <sub>1</sub> /n                                               | P-1                                                             | Pbca                                                                          |
| a/Å                                 | 22.9709(10)                                                      | 22.9052(12)                                                      | 14.5830(5)                                                      | 19.0891(11)                                                                   |
| b/Å                                 | 13.9182(6)                                                       | 14.0471(8)                                                       | 14.8404(5)                                                      | 26.9744(15)                                                                   |
| c/Å                                 | 23.5460(10)                                                      | 23.7817(13)                                                      | 17.3526(6)                                                      | 31.1806(19)                                                                   |
| α/°                                 | 90                                                               | 90                                                               | 69.7290(10)                                                     | 90                                                                            |
| β/°                                 | 111.1090(10)                                                     | 111.0970(10)                                                     | 89.4670(10)                                                     | 90                                                                            |
| γ/°                                 | 90                                                               | 90                                                               | 65.6800(10)                                                     | 90                                                                            |
| Volume/Å <sup>3</sup>               | 7022.8(5)                                                        | 7138.9(7)                                                        | 3170.88(19)                                                     | 16055.4(16)                                                                   |
| Z                                   | 4                                                                | 4                                                                | 2                                                               | 8                                                                             |
| ρ <sub>calc</sub> g/cm <sup>3</sup> | 1.281                                                            | 1.064                                                            | 0.989                                                           | 1.108                                                                         |
| μ/mm <sup>-1</sup>                  | 0.666                                                            | 0.770                                                            | 0.957                                                           | 1.093                                                                         |

|                                                |                                                                              |                                                                              |                                                                              |                                                                              |
|------------------------------------------------|------------------------------------------------------------------------------|------------------------------------------------------------------------------|------------------------------------------------------------------------------|------------------------------------------------------------------------------|
| F(000)                                         | 2912.0                                                                       | 2444.0                                                                       | 1020.0                                                                       | 5504.0                                                                       |
| Crystal size/mm <sup>3</sup>                   | 0.3×0.2×0.2                                                                  | 0.2×0.15×0.1                                                                 | 0.2×0.2×0.2                                                                  | 0.25×0.2×0.15                                                                |
| Radiation                                      | MoK $\alpha$<br>( $\lambda = 0.71073$ )                                      | MoK $\alpha$ ( $\lambda =$<br>0.71073)                                       | MoK $\alpha$ ( $\lambda =$<br>0.71073)                                       | MoK $\alpha$ ( $\lambda =$<br>0.71073)                                       |
| Reflections collected                          | 140333                                                                       | 157820                                                                       | 59783                                                                        | 368618                                                                       |
| 2 $\Theta$ range for data<br>collection/°      | 3.464 to 55.054                                                              | 4.526 to 55.19                                                               | 4.302 to 51.364                                                              | 4.528 to 55.218                                                              |
| Index ranges                                   | -29 $\leq$ h $\leq$ 29,<br>-18 $\leq$ k $\leq$ 18,<br>-30 $\leq$ l $\leq$ 30 | -29 $\leq$ h $\leq$ 29,<br>-17 $\leq$ k $\leq$ 18,<br>-30 $\leq$ l $\leq$ 30 | -17 $\leq$ h $\leq$ 17,<br>-18 $\leq$ k $\leq$ 18,<br>-21 $\leq$ l $\leq$ 21 | -24 $\leq$ h $\leq$ 24,<br>-35 $\leq$ k $\leq$ 35,<br>-40 $\leq$ l $\leq$ 40 |
| Independent reflections                        | 16119<br>[R <sub>int</sub> = 0.1139]                                         | 16447<br>[R <sub>int</sub> = 0.0685]                                         | 12017<br>[R <sub>int</sub> = 0.0972]                                         | 18584<br>[R <sub>int</sub> = 0.1161]                                         |
| Data/restraints/parameters                     | 16119/0/588                                                                  | 16447/1348/619                                                               | 12017/1725/678                                                               | 18584/0/737                                                                  |
| Goodness-of-fit on F <sup>2</sup>              | 1.008                                                                        | 1.074                                                                        | 1.041                                                                        | 1.066                                                                        |
| Final R indexes [I $\geq$ 2 $\sigma$<br>(I)]   | R <sub>1</sub> = 0.0437, wR <sub>2</sub><br>= 0.1272                         | R <sub>1</sub> = 0.0365,<br>wR <sub>2</sub> = 0.1008                         | R <sub>1</sub> = 0.0803,<br>wR <sub>2</sub> = 0.2118                         | R <sub>1</sub> = 0.0424,<br>wR <sub>2</sub> = 0.0907                         |
| Final R indexes [all data]                     | R <sub>1</sub> = 0.0570, wR <sub>2</sub><br>= 0.1406                         | R <sub>1</sub> = 0.0571,<br>wR <sub>2</sub> = 0.1086                         | R <sub>1</sub> = 0.0942,<br>wR <sub>2</sub> = 0.2219                         | R <sub>1</sub> = 0.0759,<br>wR <sub>2</sub> = 0.1013                         |
| Largest diff. peak/hole/e<br>$\text{\AA}^{-3}$ | 1.45/-1.15                                                                   | 0.87/-0.72                                                                   | 1.43/-1.30                                                                   | 1.15/-0.83                                                                   |

**Table S4. Selected bond lengths [ $\text{\AA}$ ] and bond angles [deg] of complex 1**

**Bond lengths**

|            |          |            |          |
|------------|----------|------------|----------|
| La(1)-O(1) | 2.334(2) | La(1)-N(1) | 2.721(2) |
| La(1)-O(2) | 2.277(2) | La(1)-N(2) | 2.713(2) |
| La(1)-O(3) | 2.357(2) | La(1)-N(3) | 2.836(3) |
| La(1)-O(4) | 2.607(2) |            |          |

**Bond angles**

|                 |           |                 |           |
|-----------------|-----------|-----------------|-----------|
| O(1)-La(1)-O(2) | 103.50(7) | O(1)-La(1)-O(3) | 155.53(7) |
| O(1)-La(1)-O(4) | 80.24(7)  | O(1)-La(1)-N(1) | 73.14(7)  |
| O(1)-La(1)-N(2) | 119.81(7) | O(1)-La(1)-N(3) | 83.16(7)  |
| O(2)-La(1)-O(4) | 94.40(7)  | O(2)-La(1)-N(1) | 72.10(7)  |
| O(2)-La(1)-N(2) | 103.97(7) | O(2)-La(1)-N(3) | 169.00(7) |
| O(3)-La(1)-O(2) | 93.39(7)  | O(3)-La(1)-O(4) | 80.94(7)  |
| O(3)-La(1)-N(1) | 129.76(7) | O(3)-La(1)-N(2) | 71.65(7)  |
| O(3)-La(1)-N(3) | 83.19(7)  | O(4)-La(1)-N(1) | 145.90(7) |

|                 |           |                 |           |
|-----------------|-----------|-----------------|-----------|
| O(4)-La(1)-N(2) | 147.59(7) | O(4)-La(1)-N(3) | 95.37(7)  |
| N(1)-La(1)-N(2) | 66.27(7)  | N(1)-La(1)-N(3) | 102.08(7) |
| N(2)-La(1)-N(3) | 65.04(7)  |                 |           |

**Table S5. Selected bond lengths [ $\text{\AA}$ ] and bond angles [deg] of complex 2**

| <b>Bond lengths</b> |            |                 |            |
|---------------------|------------|-----------------|------------|
| Nd(1)-O(1)          | 2.2718(16) | Nd(1)-N(1)      | 2.6591(19) |
| Nd(1)-O(2)          | 2.2320(16) | Nd(1)-N(2)      | 2.6560(2)  |
| Nd(1)-O(3)          | 2.2875(17) | Nd(1)-N(3)      | 2.8280(2)  |
| Nd(1)-O(4)          | 2.5767(18) |                 |            |
| <b>Bond angles</b>  |            |                 |            |
| O(1)-Nd(1)-O(2)     | 103.78(6)  | O(1)-Nd(1)-O(3) | 152.72(6)  |
| O(1)-Nd(1)-O(4)     | 79.80(6)   | O(1)-Nd(1)-N(1) | 74.36(6)   |
| O(1)-Nd(1)-N(2)     | 121.62(6)  | O(1)-Nd(1)-N(3) | 82.65(6)   |
| O(2)-Nd(1)-O(4)     | 91.14(6)   | O(2)-Nd(1)-N(1) | 73.71(6)   |
| O(2)-Nd(1)-N(2)     | 105.05(6)  | O(2)-Nd(1)-N(3) | 171.05(7)  |
| O(2)-Nd(1)-O(3)     | 93.14(6)   | O(3)-Nd(1)-O(4) | 78.60(6)   |
| O(3)-Nd(1)-N(1)     | 131.74(6)  | O(3)-Nd(1)-N(2) | 72.67(6)   |
| O(3)-Nd(1)-N(3)     | 83.29(7)   | O(4)-Nd(1)-N(1) | 145.58(6)  |
| O(4)-Nd(1)-N(2)     | 147.52(6)  | O(4)-Nd(1)-N(3) | 96.17(7)   |
| N(2)-Nd(1)-N(1)     | 66.87(6)   | N(1)-Nd(1)-N(3) | 102.57(7)  |
| N(2)-Nd(1)-N(3)     | 66.06(7)   |                 |            |

**Table S6. Selected bond lengths [ $\text{\AA}$ ] and bond angles [deg] of complex 4**

| <b>Bond lengths</b> |            |                |            |
|---------------------|------------|----------------|------------|
| Y(1)-O(1)           | 2.175(3)   | Y(1)-O(2)      | 2.172(3)   |
| Y(1)-O(3)           | 2.127(3)   | Y(1)-O(4)      | 2.357(3)   |
| Y(1)-N(1)           | 2.541(4)   | Y(1)-N(2)      | 2.511(4)   |
| <b>Bond angles</b>  |            |                |            |
| O(1)-Y(1)-O(3)      | 104.11(12) | O(1)-Y(1)-O(4) | 83.38(12)  |
| O(1)-Y(1)-N(1)      | 79.94(12)  | O(1)-Y(1)-N(2) | 99.50(12)  |
| O(2)-Y(1)-O(1)      | 144.61(12) | O(2)-Y(1)-O(3) | 108.70(12) |
| O(2)-Y(1)-O(4)      | 83.87(13)  | O(2)-Y(1)-N(1) | 79.29(12)  |
| O(2)-Y(1)-N(2)      | 100.33(13) | O(3)-Y(1)-O(4) | 89.72(11)  |
| O(3)-Y(1)-N(1)      | 148.04(12) | O(3)-Y(1)-N(2) | 77.19(12)  |
| O(4)-Y(1)-N(1)      | 122.18(13) | O(4)-Y(1)-N(2) | 166.91(12) |
| N(2)-Y(1)-N(1)      | 70.90(13)  |                |            |

**Table S7. Selected bond lengths [ $\text{\AA}$ ] and bond angles [deg] of complex 6**

| <b>Bond lengths</b> |           |                   |           |
|---------------------|-----------|-------------------|-----------|
| La(1)-O(1)          | 2.352(2)  | La(1)-O(2)        | 2.466(2)  |
| La(1)-O(3)          | 2.288(2)  | La(1)-O(4)        | 2.465(2)  |
| La(1)-N(1)          | 2.761(3)  | La(1)-N(2)        | 2.727(3)  |
| La(1)-N(3)          | 2.905(3)  | La(2)-O(2)        | 2.443(2)  |
| La(2)-O(4)          | 2.463(2)  | La(2)-O(5)        | 2.357(2)  |
| La(2)-O(6)          | 2.293(2)  | La(2)-N(4)        | 2.748(3)  |
| La(2)-N(5)          | 2.744(3)  | La(2)-N(6)        | 2.883(3)  |
| <b>Bond angles</b>  |           |                   |           |
| O(1)-La (1)-O(4)    | 91.28(7)  | O(1)-La (1)-N(1)  | 74.10(8)  |
| O(1)-La (1)-N(2)    | 91.34(8)  | O(2)-La (1)-O(1)  | 129.57(7) |
| O(2)-La (1)-N(1)    | 75.24(7)  | O(2)-La (1)-N(2)  | 111.49(8) |
| O(3)-La (1)-O(2)    | 84.14(7)  | O(3)-La (1)-O(1)  | 146.26(8) |
| O(3)-La (1)-O(4)    | 107.99(7) | O(3)-La (1)-N(1)  | 120.75(8) |
| O(3)-La (1)-N(2)    | 71.24(8)  | O(4)-La (1)-O(2)  | 64.42(7)  |
| O(3)-La(1)-N(3)     | 77.13(8)  | O(2)-La(1)-N(3)   | 160.81(8) |
| O(4)-La(1)-N(3)     | 117.55(7) | O(1)-La(1)-N(3)   | 69.36(8)  |
| N(2)-La(1)-N(3)     | 66.38(8)  | N(1)-La(1)-N(3)   | 118.11(8) |
| O(4)-La (1)-N(1)    | 111.31(7) | O(4)-La(1)-N(2)   | 175.89(8) |
| O(2)-La(2)-O(4)     | 64.76(7)  | O(2)-La (2)-N(4)  | 113.40(7) |
| O(2)-La(2)-N(5)     | 177.78(7) | O(4)-La (2)-N(4)  | 76.26(7)  |
| O(4)-La (2)-N(5)    | 113.48(7) | O(5)-La(2)-N (4)  | 73.91(8)  |
| O(5)-La(2)-N(5)     | 91.51(8)  | O(6)-La(2)-O(2)   | 106.92(7) |
| O(6)-La (2)-O(4)    | 83.72(7)  | O(6)-La(2)-O(5)   | 147.50(8) |
| O(6)-La (2)-N(4)    | 120.35(8) | O(6)-La(2)-N(5)   | 71.30(8)  |
| O(5)-La(2)-O(2)     | 90.68(7)  | O(5)-La(2)-O(4)   | 128.78(7) |
| N(5)-La (2)-N(4)    | 66.95(7)  | La(2)-O (2)-La(1) | 114.97(8) |
| La(2)-O(4)-La(1)    | 114.29(8) | N(1)-La (1)-N(3)  | 118.11(8) |
| N(2)-La(1)-N(1)     | 66.45(8)  | N(2)-La(1)-N(3)   | 66.38(8)  |
| O(2)-La(2)-N(6)     | 114.54(7) | O(4)-La(2)-N(6)   | 161.44(7) |
| O(5)-La(2)-N(6)     | 68.96(8)  | O(6)-La(2)-N(6)   | 78.82(8)  |
| N(4)-La(2)-N(6)     | 118.22(7) | N(5)-La(2)-N(6)   | 66.64(8)  |

### 3. Kinetic study of *cis*-4d formation from CO<sub>2</sub> and CHO catalysed by 1/TBAI

#### Reaction order with respect to P(CO<sub>2</sub>)

**Table S8.** Complex 1/TBAI catalysed cycloaddition of CO<sub>2</sub> (1-20 bar) and CHO <sup>a</sup>

| Entry | Pressure (bar) | Yield <sup>b</sup> (%) |
|-------|----------------|------------------------|
| 1     | 1              | 43                     |
| 2     | 7              | 43                     |
| 3     | 10             | 44                     |
| 4     | 15             | 46                     |
| 5     | 20             | 47                     |

<sup>a</sup> Reaction conditions: [CHO]<sub>0</sub> = 9.84 M, 2 mol% complex **1** (196.9 mM), 4 mol% TBAI (393.2 mM), 25 °C. <sup>b</sup> Yield was determined by <sup>1</sup>H NMR spectroscopy of the reaction mixture.

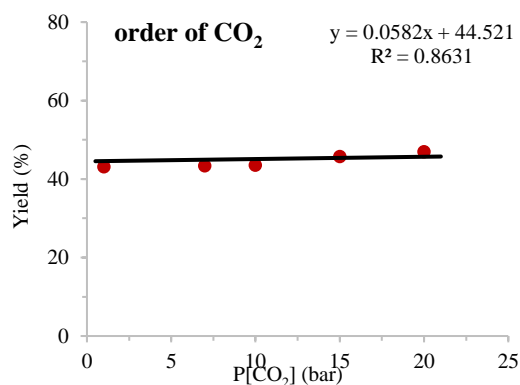

**Figure S5.** Plot of the yield of *cis*-4d versus different CO<sub>2</sub> pressure

#### Reaction order with respect to [CHO]

**Table S9.** Complex 1/TBAI catalysed cycloaddition of CO<sub>2</sub> (1 bar) and CHO <sup>a</sup>

| Entry | Time (h) | Yield <sup>b</sup> (%) | [CHO] <sub>0</sub> /[CHO] <sub>t</sub> | ln([CHO] <sub>0</sub> /[CHO] <sub>t</sub> ) |
|-------|----------|------------------------|----------------------------------------|---------------------------------------------|
| 1     | 2        | 16                     | 1.19                                   | 0.174353                                    |
| 2     | 4        | 30                     | 1.43                                   | 0.356675                                    |
| 3     | 6        | 44                     | 1.79                                   | 0.579818                                    |
| 4     | 8        | 57                     | 2.33                                   | 0.843970                                    |
| 5     | 10       | 63                     | 2.70                                   | 0.994252                                    |
| 6     | 12       | 69                     | 3.23                                   | 1.171183                                    |



<sup>a</sup> Reaction conditions:  $[\text{CHO}]_0 = 9.84 \text{ M}$ , 2 mol% complex **1** (196.9 mM), 4 mol% TBAI (393.2 mM), 1 bar  $\text{CO}_2$ , 25 °C. <sup>b</sup> Yield was determined by  $^1\text{H}$  NMR spectroscopy of the reaction mixture.

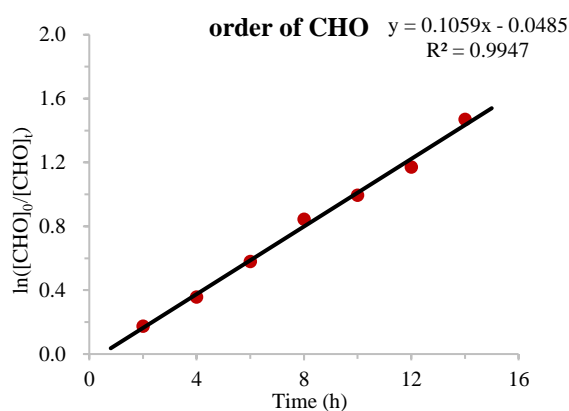

**Figure S6.** Plot of the  $([\text{CHO}]_0/[\text{CHO}]_t)$  versus time.

### Reaction order with respect to [1]

**Table S10.** Complex **1** (0.5 mol%)/TBAI catalysed cycloaddition of  $\text{CO}_2$  and CHO <sup>a</sup>

| Entry | Time (h) | Yield <sup>b</sup> (%) | $[\text{CHO}]_0/[\text{CHO}]_t$ | $\ln([\text{CHO}]_0/[\text{CHO}]_t)$ |
|-------|----------|------------------------|---------------------------------|--------------------------------------|
| 1     | 4        | 6                      | 1.06                            | 0.061875                             |
| 2     | 8        | 8                      | 1.09                            | 0.083382                             |
| 3     | 10       | 10                     | 1.11                            | 0.105361                             |
| 4     | 12       | 13                     | 1.15                            | 0.138113                             |
| 5     | 14       | 15                     | 1.18                            | 0.162519                             |
| 6     | 16       | 16                     | 1.19                            | 0.174353                             |

<sup>a</sup> Reaction conditions:  $[\text{CHO}]_0 = 9.84 \text{ M}$ , 0.5 mol% complex **1** (49.1 mM), 4 mol% TBAI (393.2 mM), 1 bar  $\text{CO}_2$ , 25 °C. <sup>b</sup> Yield was determined by  $^1\text{H}$  NMR spectroscopy of the reaction mixture.

**Table S11.** Complex **1** (1 mol%)/TBAI catalysed cycloaddition of  $\text{CO}_2$  and CHO <sup>a</sup>

| Entry | Time (h) | Yield <sup>b</sup> (%) | $[\text{CHO}]_0/[\text{CHO}]_t$ | $\ln([\text{CHO}]_0/[\text{CHO}]_t)$ |
|-------|----------|------------------------|---------------------------------|--------------------------------------|
| 1     | 2        | 9                      | 1.10                            | 0.094311                             |
| 2     | 4        | 13                     | 1.15                            | 0.139262                             |
| 3     | 6        | 20                     | 1.25                            | 0.223144                             |
| 4     | 8        | 24                     | 1.32                            | 0.274437                             |
| 5     | 10       | 28                     | 1.39                            | 0.328504                             |
| 6     | 12       | 30                     | 1.43                            | 0.356675                             |

<sup>a</sup> Reaction conditions:  $[\text{CHO}]_0 = 9.84 \text{ M}$ , 1 mol% complex **1** (98.3 mM), 4 mol% TBAI (393.2

mM), 1 bar CO<sub>2</sub>, 25 °C. <sup>b</sup> Yield was determined by <sup>1</sup>H NMR spectroscopy of the reaction mixture.

**Table S12.** Complex **1** (2 mol%)/TBAI catalysed cycloaddition of CO<sub>2</sub> and CHO <sup>a</sup>

| Entry | Time (h) | Yield <sup>b</sup> (%) | [CHO] <sub>0</sub> /[CHO] <sub>t</sub> | ln([CHO] <sub>0</sub> /[CHO] <sub>t</sub> ) |
|-------|----------|------------------------|----------------------------------------|---------------------------------------------|
| 1     | 1        | 9                      | 1.10                                   | 0.094311                                    |
| 2     | 2        | 16                     | 1.19                                   | 0.174353                                    |
| 3     | 3        | 22                     | 1.28                                   | 0.248461                                    |
| 4     | 4        | 30                     | 1.43                                   | 0.356675                                    |
| 5     | 5        | 36                     | 1.56                                   | 0.446287                                    |

<sup>a</sup> Reaction conditions: [CHO]<sub>0</sub> = 9.84 M, 2 mol% complex **1** (196.9 mM), 4 mol% TBAI (393.2 mM), 1 bar CO<sub>2</sub>, 25 °C. <sup>b</sup> Yield was determined by <sup>1</sup>H NMR spectroscopy of the reaction mixture.

**Table S13.** Complex **1** (3 mol%)/TBAI catalysed cycloaddition of CO<sub>2</sub> and CHO <sup>a</sup>

| Entry | Time (h) | Yield <sup>b</sup> (%) | [CHO] <sub>0</sub> /[CHO] <sub>t</sub> | ln([CHO] <sub>0</sub> /[CHO] <sub>t</sub> ) |
|-------|----------|------------------------|----------------------------------------|---------------------------------------------|
| 1     | 1        | 10                     | 1.11                                   | 0.105361                                    |
| 2     | 2        | 19                     | 1.23                                   | 0.210721                                    |
| 3     | 3        | 26                     | 1.35                                   | 0.301105                                    |
| 4     | 4        | 36                     | 1.56                                   | 0.446287                                    |
| 5     | 5        | 42                     | 1.72                                   | 0.544727                                    |

<sup>a</sup> Reaction conditions: [CHO]<sub>0</sub> = 9.84 M, 3 mol% complex **1** (295.1 mM), 4 mol% TBAI (393.2 mM), 1 bar CO<sub>2</sub>, 25 °C. <sup>b</sup> Yield was determined by <sup>1</sup>H NMR spectroscopy of the reaction mixture.

**Table S14.** Complex **1** (4 mol%)/TBAI catalysed cycloaddition of CO<sub>2</sub> and CHO <sup>a</sup>

| Entry | Time (h) | Yield <sup>b</sup> (%) | [CHO] <sub>0</sub> /[CHO] <sub>t</sub> | ln([CHO] <sub>0</sub> /[CHO] <sub>t</sub> ) |
|-------|----------|------------------------|----------------------------------------|---------------------------------------------|
| 1     | 1        | 9                      | 1.10                                   | 0.094311                                    |
| 2     | 2        | 19                     | 1.23                                   | 0.210721                                    |
| 3     | 3        | 28                     | 1.39                                   | 0.328504                                    |
| 4     | 4        | 37                     | 1.59                                   | 0.462035                                    |
| 5     | 5        | 49                     | 1.96                                   | 0.673345                                    |

<sup>a</sup> Reaction conditions: [CHO]<sub>0</sub> = 9.84 M, 4 mol% complex **1** (393.4 mM), 4 mol% TBAI (393.2 mM), 1 bar CO<sub>2</sub>, 25 °C. <sup>b</sup> Yield was determined by <sup>1</sup>H NMR spectroscopy of the reaction mixture.

**Table S15.**  $k_{\text{obs}}$  data

| <b>1 (M)</b> | <b>ln[1]</b> | <b><math>k_{\text{obs}}</math></b> | <b>ln<math>k_{\text{obs}}</math></b> |
|--------------|--------------|------------------------------------|--------------------------------------|
| 0.0491       | -3.013896    | 0.0102                             | -4.585368                            |
| 0.0983       | -2.319731    | 0.0276                             | -3.589940                            |
| 0.1967       | -1.625059    | 0.0886                             | -2.423623                            |
| 0.2951       | -1.220441    | 0.1114                             | -2.194628                            |
| 0.3934       | -0.932928    | 0.1409                             | -1.959705                            |

**Determination the rate order of complex 1**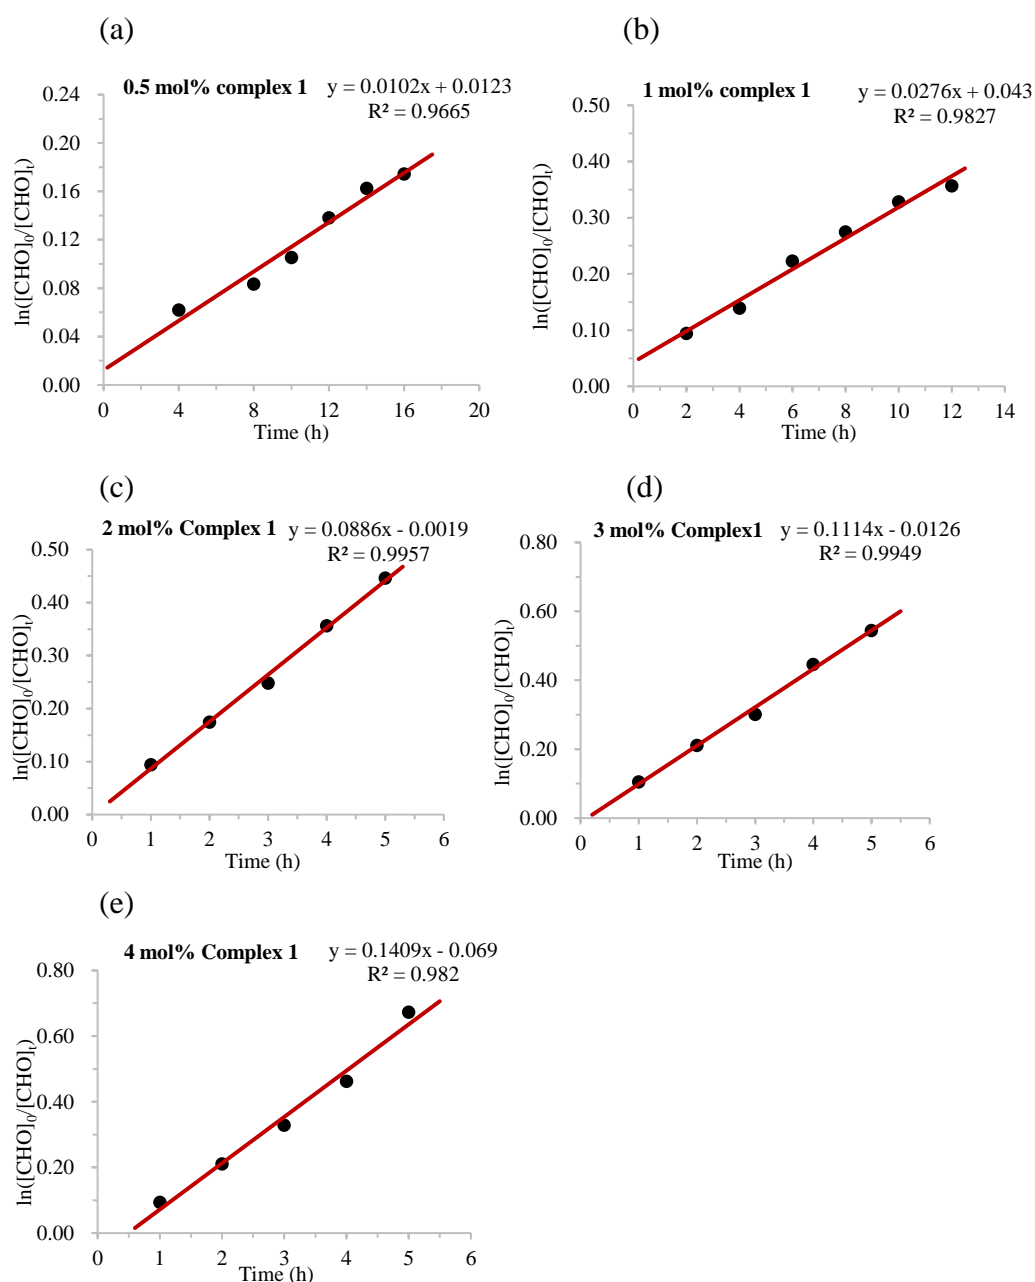**Figure S7.** Plot of  $\ln([\text{CHO}]_0/[\text{CHO}]_t)$  versus time in the range 0.5-4 mol% [1] (a-e).

## Reaction order with respect to [TBAI]

**Table S16.** Complex **1** /TBAI (0.5 mol%) catalysed cycloaddition of CO<sub>2</sub> and CHO<sup>a</sup>

| Entry | Time (h) | Yield <sup>b</sup> (%) | [CHO] <sub>0</sub> /[CHO] <sub>t</sub> | ln([CHO] <sub>0</sub> /[CHO] <sub>t</sub> ) |
|-------|----------|------------------------|----------------------------------------|---------------------------------------------|
| 1     | 1        | 2                      | 1.02                                   | 0.020203                                    |
| 2     | 2        | 3                      | 1.03                                   | 0.030459                                    |
| 3     | 3        | 4                      | 1.04                                   | 0.040822                                    |
| 4     | 4        | 6                      | 1.06                                   | 0.061875                                    |
| 5     | 5        | 7                      | 1.08                                   | 0.072571                                    |
| 6     | 6        | 9                      | 1.10                                   | 0.094311                                    |

<sup>a</sup> Reaction conditions: [CHO]<sub>0</sub> = 9.84 M, 2 mol% complex **1** (196.9 mM), 0.5 mol% TBAI (49.3 mM), 1 bar CO<sub>2</sub>, 25 °C. <sup>b</sup> Yield was determined by <sup>1</sup>H NMR spectroscopy of the reaction mixture.

**Table S17.** Complex **1** /TBAI (0.8 mol%) catalysed cycloaddition of CO<sub>2</sub> and CHO<sup>a</sup>

| Entry | Time (h) | Yield <sup>b</sup> (%) | [CHO] <sub>0</sub> /[CHO] <sub>t</sub> | ln([CHO] <sub>0</sub> /[CHO] <sub>t</sub> ) |
|-------|----------|------------------------|----------------------------------------|---------------------------------------------|
| 1     | 1        | 9                      | 1.10                                   | 0.094311                                    |
| 2     | 2        | 12                     | 1.14                                   | 0.127833                                    |
| 3     | 3        | 16                     | 1.19                                   | 0.174353                                    |
| 4     | 4        | 20                     | 1.25                                   | 0.223144                                    |
| 5     | 5        | 25                     | 1.33                                   | 0.287682                                    |
| 6     | 6        | 30                     | 1.43                                   | 0.356675                                    |

<sup>a</sup> Reaction conditions: [CHO]<sub>0</sub> = 9.84 M, 2 mol% complex **1** (196.9 mM), 0.8 mol% TBAI (78.7 mM), 1 bar CO<sub>2</sub>, 25 °C. <sup>b</sup> Yield was determined by <sup>1</sup>H NMR spectroscopy of the reaction mixture.

**Table S18.** Complex **1** /TBAI (1 mol%) catalysed cycloaddition of CO<sub>2</sub> and CHO<sup>a</sup>

| Entry | Time (h) | Yield <sup>b</sup> (%) | [CHO] <sub>0</sub> /[CHO] <sub>t</sub> | ln([CHO] <sub>0</sub> /[CHO] <sub>t</sub> ) |
|-------|----------|------------------------|----------------------------------------|---------------------------------------------|
| 1     | 1        | 7                      | 1.08                                   | 0.072571                                    |
| 2     | 2        | 12                     | 1.14                                   | 0.127833                                    |
| 3     | 3        | 17                     | 1.20                                   | 0.186330                                    |
| 4     | 4        | 24                     | 1.32                                   | 0.274437                                    |
| 5     | 5        | 29                     | 1.41                                   | 0.342490                                    |
| 6     | 6        | 35                     | 1.54                                   | 0.430783                                    |

<sup>a</sup> Reaction conditions: [CHO]<sub>0</sub> = 9.84 M, 2 mol% complex **1** (196.9 mM), 1 mol% TBAI (98.5 mM), 1 bar CO<sub>2</sub>, 25 °C. <sup>b</sup> Yield was determined by <sup>1</sup>H NMR spectroscopy of the reaction mixture.

**Table S19.** Complex **1** /TBAI (1.5 mol%) catalysed cycloaddition of CO<sub>2</sub> and CHO <sup>a</sup>

| Entry | Time (h) | Yield <sup>b</sup> (%) | [CHO] <sub>0</sub> /[CHO] <sub>t</sub> | ln([CHO] <sub>0</sub> /[CHO] <sub>t</sub> ) |
|-------|----------|------------------------|----------------------------------------|---------------------------------------------|
| 1     | 1        | 7                      | 1.08                                   | 0.072571                                    |
| 2     | 2        | 13                     | 1.15                                   | 0.139262                                    |
| 3     | 3        | 19                     | 1.23                                   | 0.210721                                    |
| 4     | 4        | 24                     | 1.32                                   | 0.274437                                    |
| 5     | 5        | 32                     | 1.47                                   | 0.385662                                    |
| 6     | 6        | 37                     | 1.59                                   | 0.462035                                    |

<sup>a</sup> Reaction conditions: [CHO]<sub>0</sub> = 9.84 M, 2 mol% complex **1** (196.9 mM), 1.5 mol% TBAI (147.3 mM), 1 bar CO<sub>2</sub>, 25 °C. <sup>b</sup> Yield was determined by <sup>1</sup>H NMR spectroscopy of the reaction mixture.

**Table S20.** Complex **1** /TBAI (2 mol%) catalysed cycloaddition of CO<sub>2</sub> and CHO <sup>a</sup>

| Entry | Time (h) | Yield <sup>b</sup> (%) | [CHO] <sub>0</sub> /[CHO] <sub>t</sub> | ln([CHO] <sub>0</sub> /[CHO] <sub>t</sub> ) |
|-------|----------|------------------------|----------------------------------------|---------------------------------------------|
| 1     | 1        | 8                      | 1.09                                   | 0.083382                                    |
| 2     | 2        | 14                     | 1.16                                   | 0.150823                                    |
| 3     | 3        | 22                     | 1.28                                   | 0.248461                                    |
| 4     | 4        | 26                     | 1.35                                   | 0.301105                                    |
| 5     | 5        | 34                     | 1.52                                   | 0.415515                                    |
| 6     | 6        | 40                     | 1.67                                   | 0.510826                                    |

<sup>a</sup> Reaction conditions: [CHO]<sub>0</sub> = 9.84 M, 2 mol% complex **1** (196.9 mM), 2 mol% TBAI (197.1 mM), 1 bar CO<sub>2</sub>, 25 °C. <sup>b</sup> Yield was determined by <sup>1</sup>H NMR spectroscopy of the reaction mixture.

**Table S21.** Complex **1** /TBAI (3 mol%) catalysed cycloaddition of CO<sub>2</sub> and CHO <sup>a</sup>

| Entry | Time (h) | Yield <sup>b</sup> (%) | [CHO] <sub>0</sub> /[CHO] <sub>t</sub> | ln([CHO] <sub>0</sub> /[CHO] <sub>t</sub> ) |
|-------|----------|------------------------|----------------------------------------|---------------------------------------------|
| 1     | 1        | 9                      | 1.10                                   | 0.094311                                    |
| 2     | 2        | 14                     | 1.16                                   | 0.150823                                    |
| 3     | 3        | 24                     | 1.32                                   | 0.274437                                    |
| 4     | 4        | 30                     | 1.43                                   | 0.356675                                    |
| 5     | 5        | 36                     | 1.56                                   | 0.446287                                    |
| 6     | 6        | 43                     | 1.75                                   | 0.562119                                    |

<sup>a</sup> Reaction conditions: [CHO]<sub>0</sub> = 9.84 M, 2 mol% complex **1** (196.9 mM), 3 mol% TBAI (294.7 mM), 1 bar CO<sub>2</sub>, 25 °C. <sup>b</sup> Yield was determined by <sup>1</sup>H NMR spectroscopy of the reaction mixture.

**Table S22.** Complex **1** /TBAI (4 mol%) catalysed cycloaddition of CO<sub>2</sub> and CHO <sup>a</sup>

| Entry | Time (h) | Yield <sup>b</sup> (%) | [CHO] <sub>0</sub> /[CHO] <sub>t</sub> | ln([CHO] <sub>0</sub> /[CHO] <sub>t</sub> ) |
|-------|----------|------------------------|----------------------------------------|---------------------------------------------|
| 1     | 1        | 9                      | 1.10                                   | 0.094311                                    |
| 2     | 2        | 16                     | 1.19                                   | 0.174353                                    |
| 3     | 3        | 22                     | 1.28                                   | 0.248461                                    |
| 4     | 4        | 30                     | 1.43                                   | 0.356675                                    |
| 5     | 5        | 36                     | 1.56                                   | 0.446287                                    |
| 6     | 6        | 44                     | 1.79                                   | 0.579818                                    |

<sup>a</sup> Reaction conditions: [CHO]<sub>0</sub> = 9.84 M, 2 mol% complex **1** (196.9 mM), 4 mol% TBAI (393.2 mM), 1 bar CO<sub>2</sub>, 25 °C. <sup>b</sup> Yield was determined by <sup>1</sup>H NMR spectroscopy of the reaction mixture.

**Table S23.** Complex **1** /TBAI (5 mol%) catalysed cycloaddition of CO<sub>2</sub> and CHO <sup>a</sup>

| Entry | Time (h) | Yield <sup>b</sup> (%) | [CHO] <sub>0</sub> /[CHO] <sub>t</sub> | ln([CHO] <sub>0</sub> /[CHO] <sub>t</sub> ) |
|-------|----------|------------------------|----------------------------------------|---------------------------------------------|
| 1     | 1        | 8                      | 1.09                                   | 0.083382                                    |
| 2     | 2        | 12                     | 1.14                                   | 0.127833                                    |
| 3     | 3        | 24                     | 1.32                                   | 0.274437                                    |
| 4     | 4        | 30                     | 1.43                                   | 0.356675                                    |
| 5     | 5        | 35                     | 1.54                                   | 0.430783                                    |
| 6     | 6        | 43                     | 1.75                                   | 0.562119                                    |

<sup>a</sup> Reaction conditions: [CHO]<sub>0</sub> = 9.84 M, 2 mol% complex **1** (196.9 mM), 5 mol% TBAI (491.8 mM), 1 bar CO<sub>2</sub>, 25 °C. <sup>b</sup> Yield was determined by <sup>1</sup>H NMR spectroscopy of the reaction mixture.

**Table S24.** Complex **1** /TBAI (6 mol%) catalysed cycloaddition of CO<sub>2</sub> and CHO <sup>a</sup>

| Entry | Time (h) | Yield <sup>b</sup> (%) | [CHO] <sub>0</sub> /[CHO] <sub>t</sub> | ln([CHO] <sub>0</sub> /[CHO] <sub>t</sub> ) |
|-------|----------|------------------------|----------------------------------------|---------------------------------------------|
| 1     | 1        | 9                      | 1.10                                   | 0.094311                                    |
| 2     | 2        | 14                     | 1.16                                   | 0.150823                                    |
| 3     | 3        | 26                     | 1.35                                   | 0.301105                                    |
| 4     | 4        | 31                     | 1.45                                   | 0.371064                                    |
| 5     | 5        | 35                     | 1.54                                   | 0.430783                                    |
| 6     | 6        | 44                     | 1.79                                   | 0.579818                                    |

<sup>a</sup> Reaction conditions: [CHO]<sub>0</sub> = 9.84 M, 2 mol% complex **1** (196.9 mM), 6 mol% TBAI (590.2 mM), 1 bar CO<sub>2</sub>, 25 °C. <sup>b</sup> Yield was determined by <sup>1</sup>H NMR spectroscopy of the reaction mixture.

**Table S25.**  $k_{\text{obs}}$  data

| [TBAI] (M) | ln[TBAI]  | $k_{\text{obs}}$ | ln $k_{\text{obs}}$ |
|------------|-----------|------------------|---------------------|
| 0.0493     | -3.009831 | 0.0148           | -4.213128           |
| 0.0787     | -2.542112 | 0.0526           | -2.945039           |
| 0.0985     | -2.317699 | 0.0721           | -2.629701           |
| 0.1473     | -1.915284 | 0.0786           | -2.543384           |
| 0.1971     | -1.624044 | 0.0853           | -2.461581           |
| 0.2947     | -1.221797 | 0.0945           | -2.359155           |
| 0.3932     | -0.933437 | 0.0958           | -2.345493           |
| 0.4918     | -0.709683 | 0.0967           | -2.336142           |
| 0.5902     | -0.527294 | 0.0954           | -2.349677           |

**Determination of rate order of TBAI**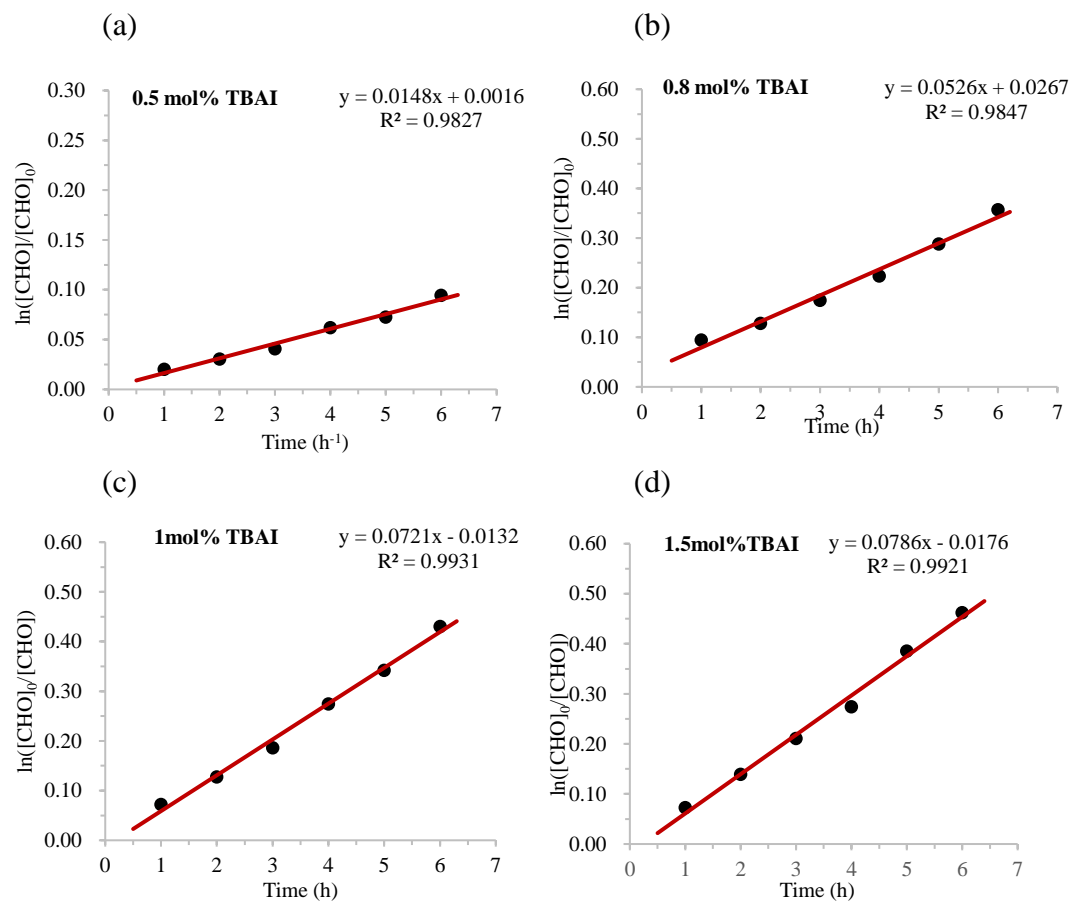

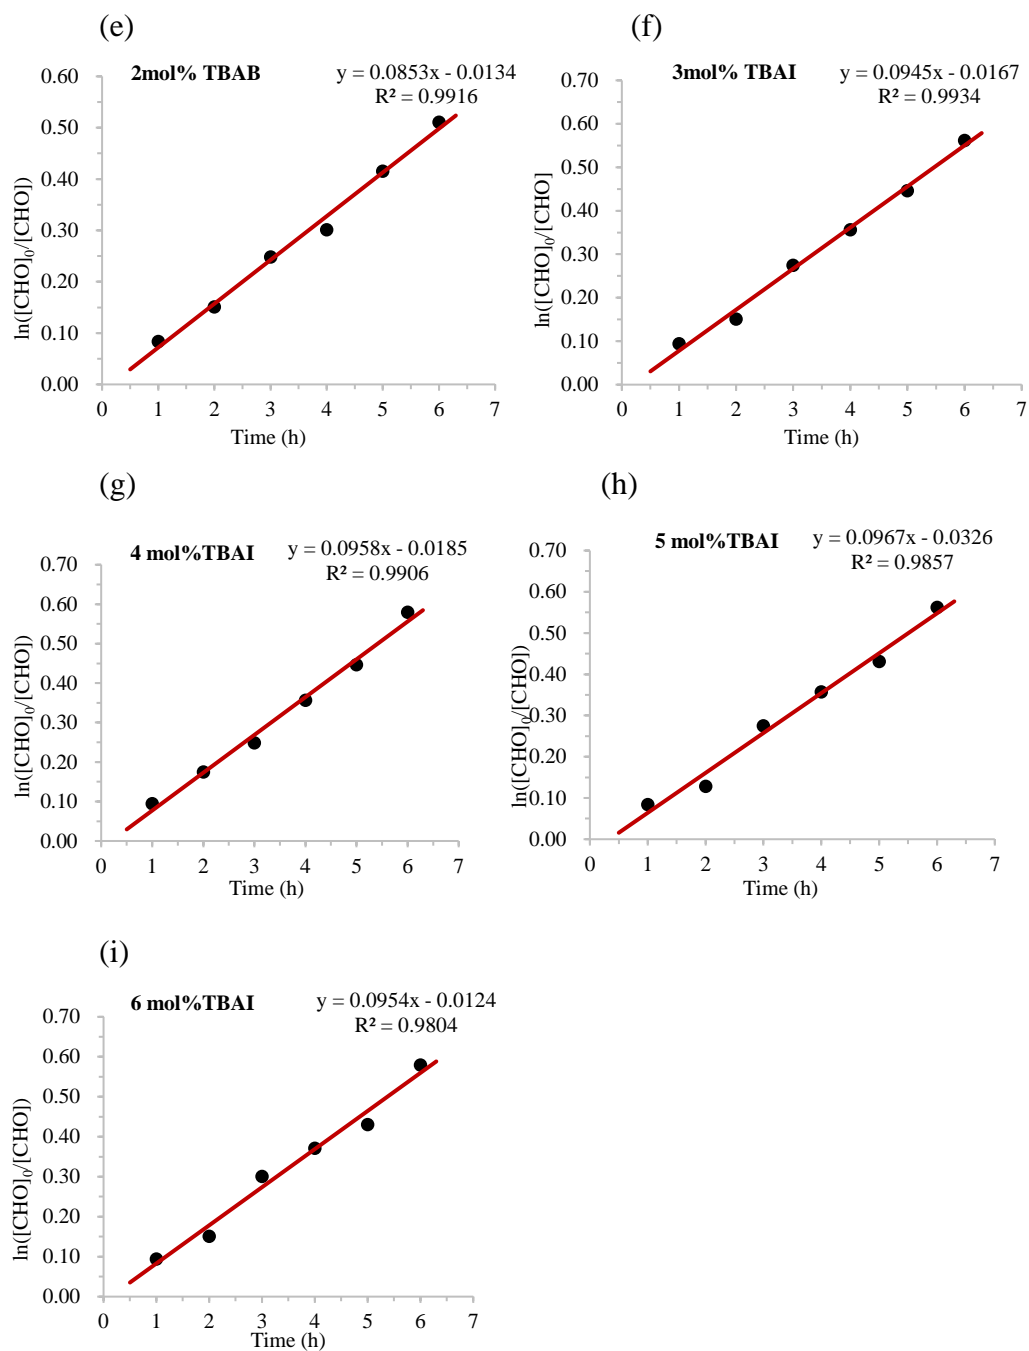

**Figure S8.** Plot of  $\ln([\text{CHO}]_0/[\text{CHO}]_t)$  versus time in the range 0.5-6 mol% [TBAI] (49.3-590.2 mM) (a-i).

### Eyring plot

**Table S26.** Complex 1/TBAI catalysed cycloaddition of  $\text{CO}_2$  and CHO at 25-110 °C <sup>a</sup>

| Entry | T (°C) | Time (h) | Yield <sup>b</sup> (%) | $[\text{CHO}]_0/[\text{CHO}]$ | $\ln([\text{CHO}]_0/[\text{CHO}]_t)$ |
|-------|--------|----------|------------------------|-------------------------------|--------------------------------------|
| 1     | 25     | 1        | 9                      | 1.10                          | 0.094311                             |
| 2     | 25     | 2        | 16                     | 1.19                          | 0.174353                             |
| 3     | 25     | 3        | 22                     | 1.28                          | 0.248461                             |



|    |     |   |    |      |          |
|----|-----|---|----|------|----------|
| 4  | 25  | 4 | 30 | 1.43 | 0.356675 |
| 5  | 25  | 5 | 36 | 1.56 | 0.446287 |
| 6  | 50  | 1 | 12 | 1.14 | 0.127833 |
| 7  | 50  | 2 | 26 | 1.35 | 0.301105 |
| 8  | 50  | 3 | 35 | 1.54 | 0.430783 |
| 9  | 50  | 4 | 42 | 1.72 | 0.544727 |
| 10 | 50  | 5 | 50 | 2.00 | 0.693147 |
| 11 | 70  | 1 | 14 | 1.16 | 0.150823 |
| 12 | 70  | 2 | 28 | 1.39 | 0.328504 |
| 13 | 70  | 3 | 36 | 1.56 | 0.446287 |
| 14 | 70  | 4 | 44 | 1.79 | 0.579818 |
| 15 | 70  | 5 | 57 | 2.33 | 0.843970 |
| 16 | 90  | 1 | 15 | 1.18 | 0.162519 |
| 17 | 90  | 2 | 30 | 1.43 | 0.356675 |
| 18 | 90  | 3 | 42 | 1.72 | 0.544727 |
| 19 | 90  | 4 | 57 | 2.33 | 0.843970 |
| 20 | 90  | 5 | 61 | 2.56 | 0.941609 |
| 21 | 110 | 1 | 17 | 1.20 | 0.186330 |
| 22 | 110 | 2 | 35 | 1.54 | 0.430783 |
| 23 | 110 | 3 | 45 | 1.82 | 0.597837 |
| 24 | 110 | 4 | 61 | 2.56 | 0.941609 |
| 25 | 110 | 5 | 70 | 3.33 | 1.203973 |

<sup>a</sup> Reactions were performed under solvent-free conditions with [CHO]<sub>0</sub> = 9.84 M, 2 mol% complex **1** (196.9 mM), 4 mol% TBAI (393.2 mM), 1 bar CO<sub>2</sub>, 25-110 °C. <sup>b</sup> Yield was determined by <sup>1</sup>H NMR spectroscopy of the reaction mixture.

**Table S27.** *k*<sub>obs</sub> and temperature data

| Entry | T(K) | <i>k</i> <sub>obs</sub> (h <sup>-1</sup> ) | <i>k</i> <sub>obs</sub> (*10 <sup>-3</sup> s <sup>-1</sup> ) | <i>k</i> <sup>a</sup> (*10 <sup>-3</sup> ) | <i>k</i> /T(*10 <sup>-6</sup> ) | ln( <i>k</i> /T) | 1/T      |
|-------|------|--------------------------------------------|--------------------------------------------------------------|--------------------------------------------|---------------------------------|------------------|----------|
| 1     | 298  | 0.0886                                     | 0.024611                                                     | 0.249918                                   | 0.838650                        | -13.991473       | 0.003356 |
| 2     | 323  | 0.1374                                     | 0.038167                                                     | 0.387570                                   | 1.199906                        | -13.633267       | 0.003096 |
| 3     | 343  | 0.1638                                     | 0.045500                                                     | 0.462037                                   | 1.347047                        | -13.517595       | 0.002915 |
| 4     | 363  | 0.2045                                     | 0.056806                                                     | 0.576841                                   | 1.589095                        | -13.352346       | 0.002755 |
| 5     | 383  | 0.2546                                     | 0.070722                                                     | 0.718161                                   | 1.875093                        | -13.186852       | 0.002611 |

<sup>a</sup> Calculated on the basis of the kinetic equation  $k_{\text{obs}} = k [\mathbf{1}]^{1.30} [\text{TBAI}]^{0.22}$

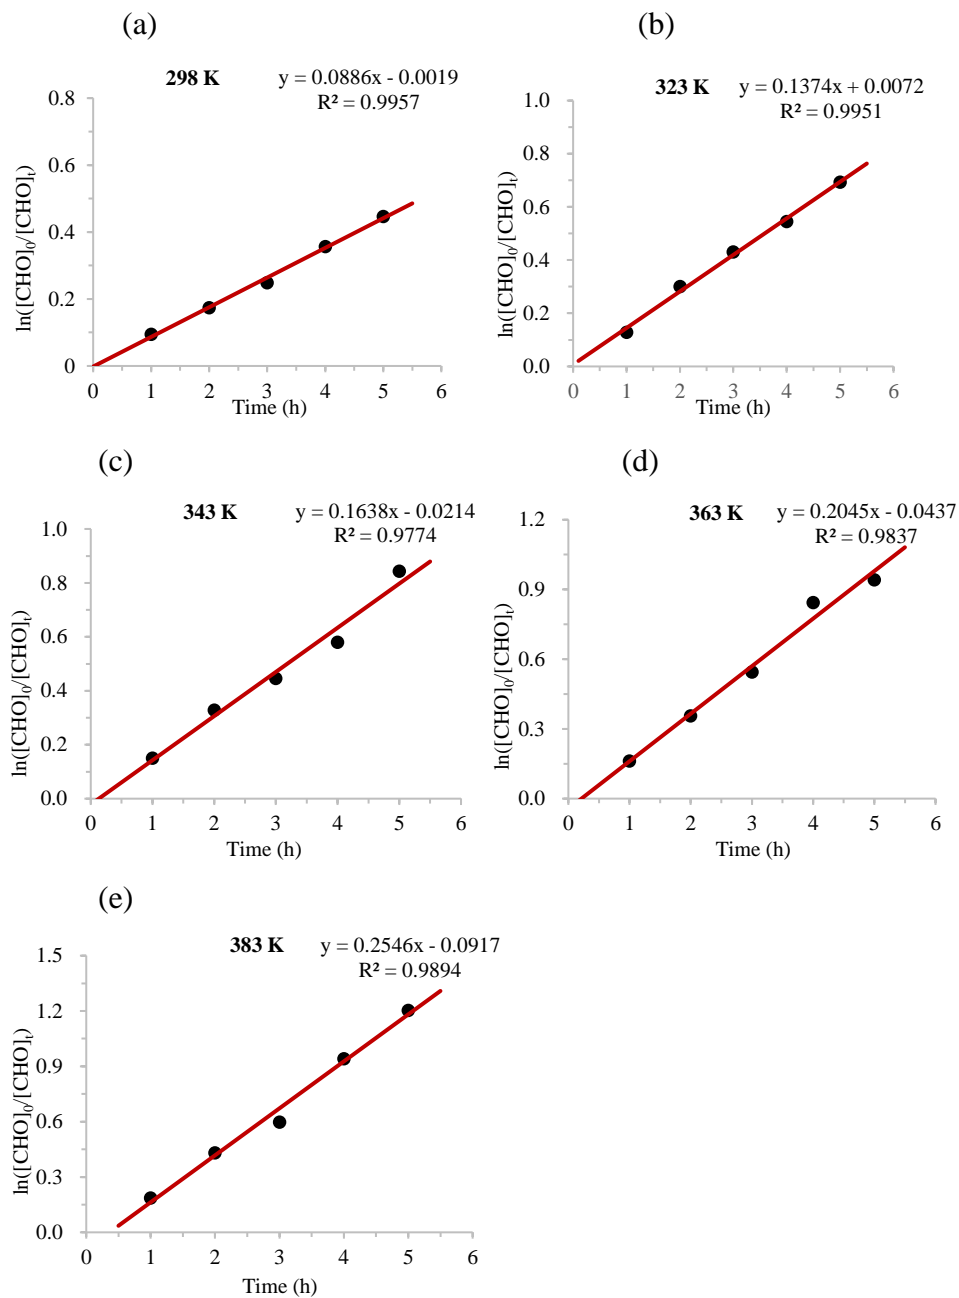

**Figure S9.** Plot of  $\ln([\text{CHO}]_0/[\text{CHO}]_t)$  versus time at 25-110 °C (a-e)

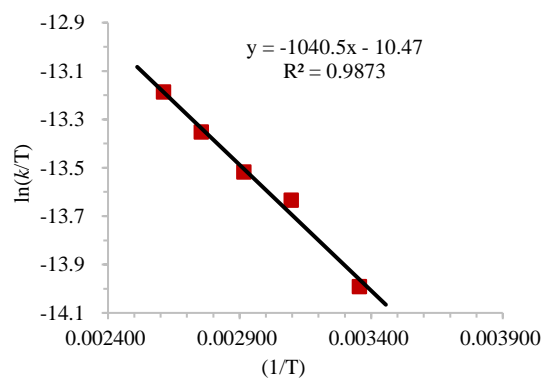

**Figure S10.** Plot of  $\ln(k/T)$  versus  $1/T$  in the range from 25 to 110 °C

## 4. NMR spectra of ligand precursors, complexes and cyclic carbonates

### NMR spectra of ligand precursors

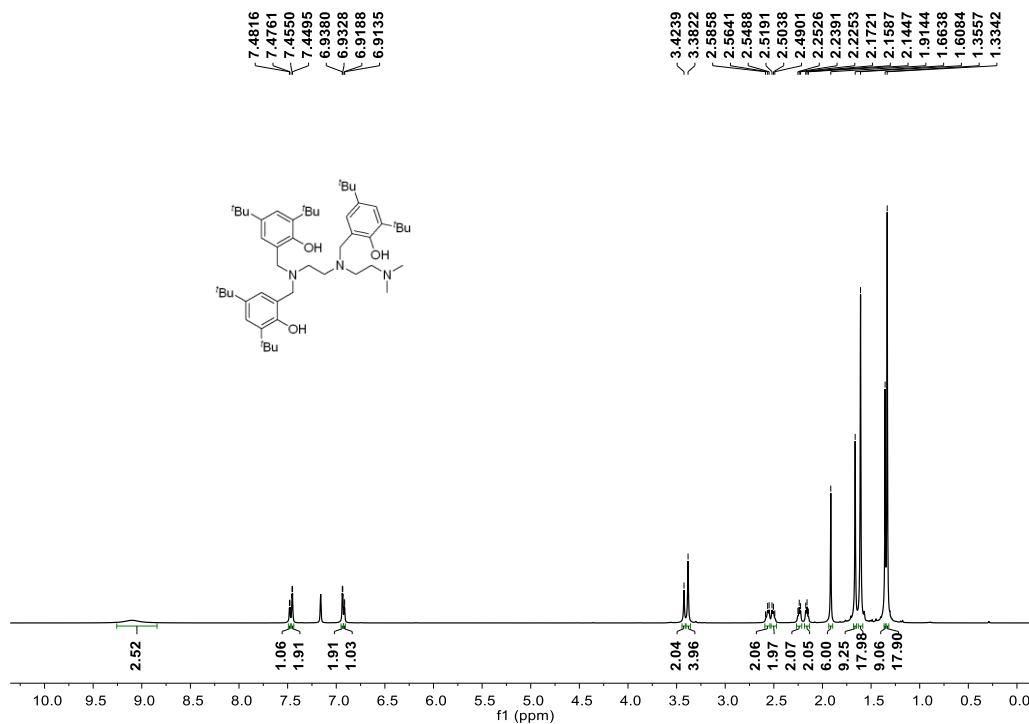

Figure S11.  $^1\text{H}$  NMR spectrum of  $\text{L}^1\text{H}_3$  in  $\text{C}_6\text{D}_6$

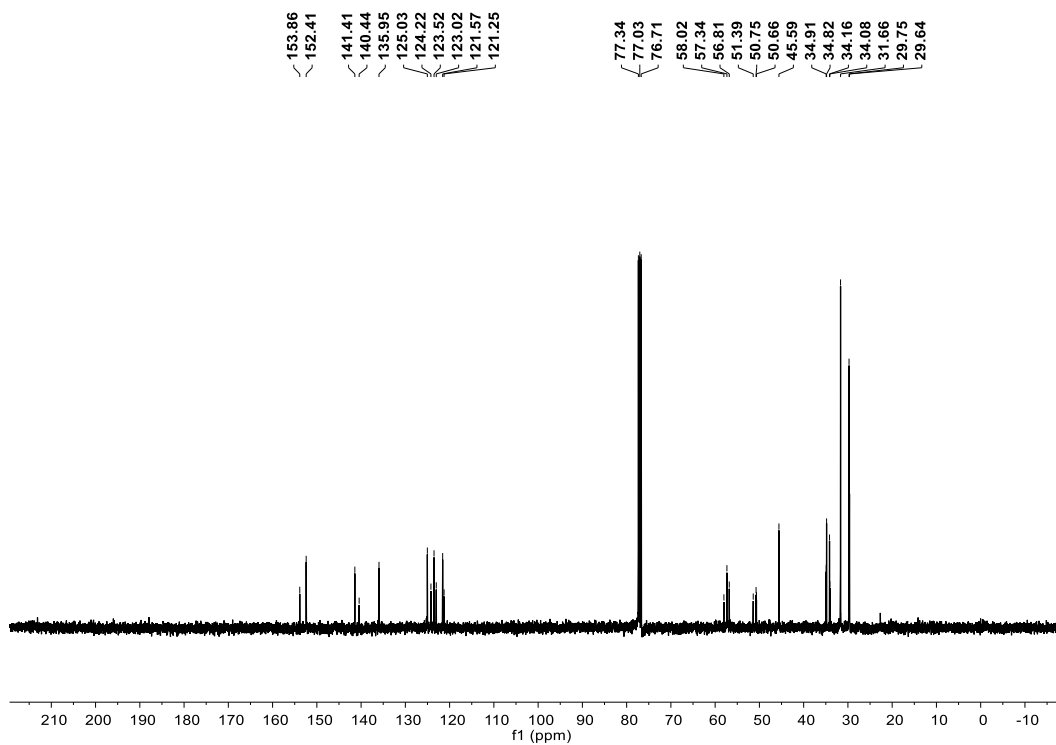

Figure S12.  $^{13}\text{C}$  NMR spectrum of  $\text{L}^1\text{H}_3$  in  $\text{CDCl}_3$

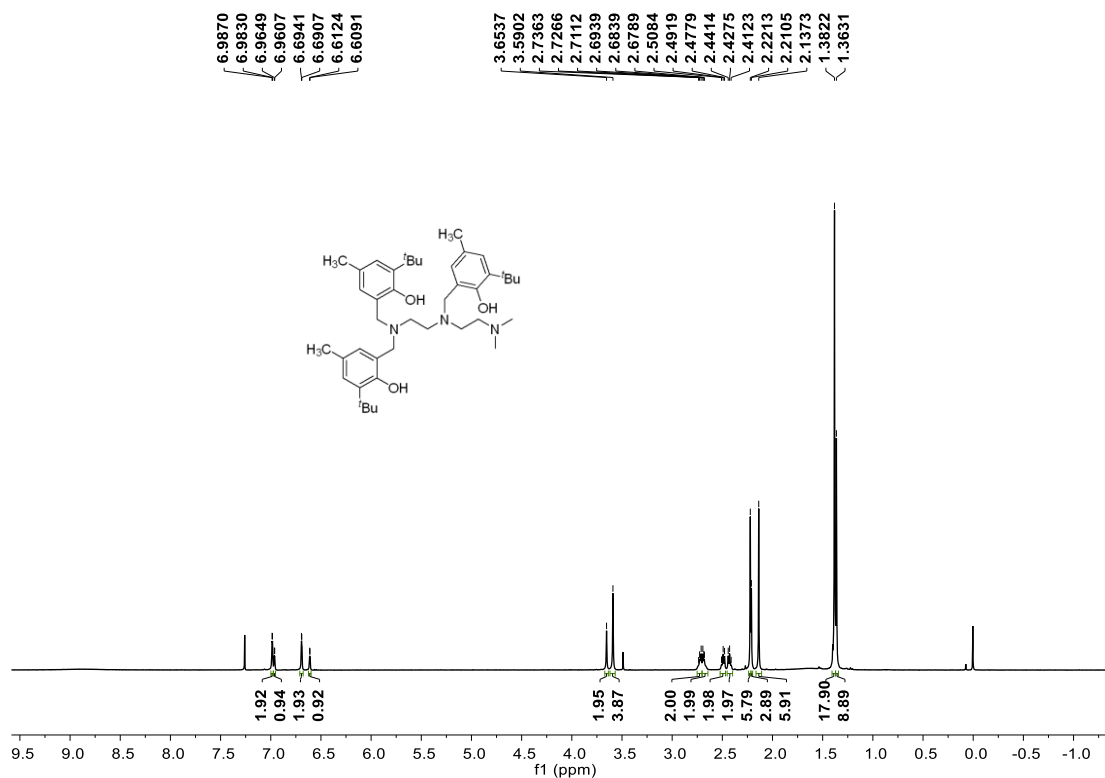

Figure S13.  $^1H$  NMR spectrum of  $L^2H_3$  in  $CDCl_3$

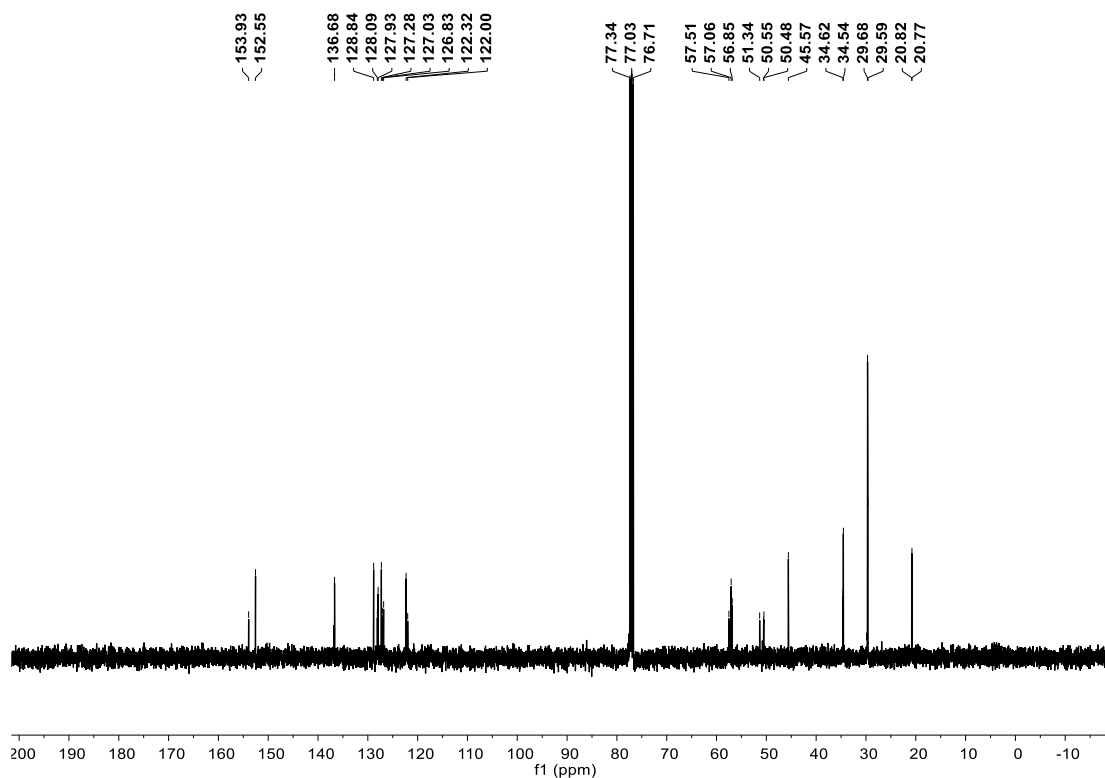

Figure S14  $^{13}C$  NMR spectrum of  $L^2H_3$  in  $CDCl_3$

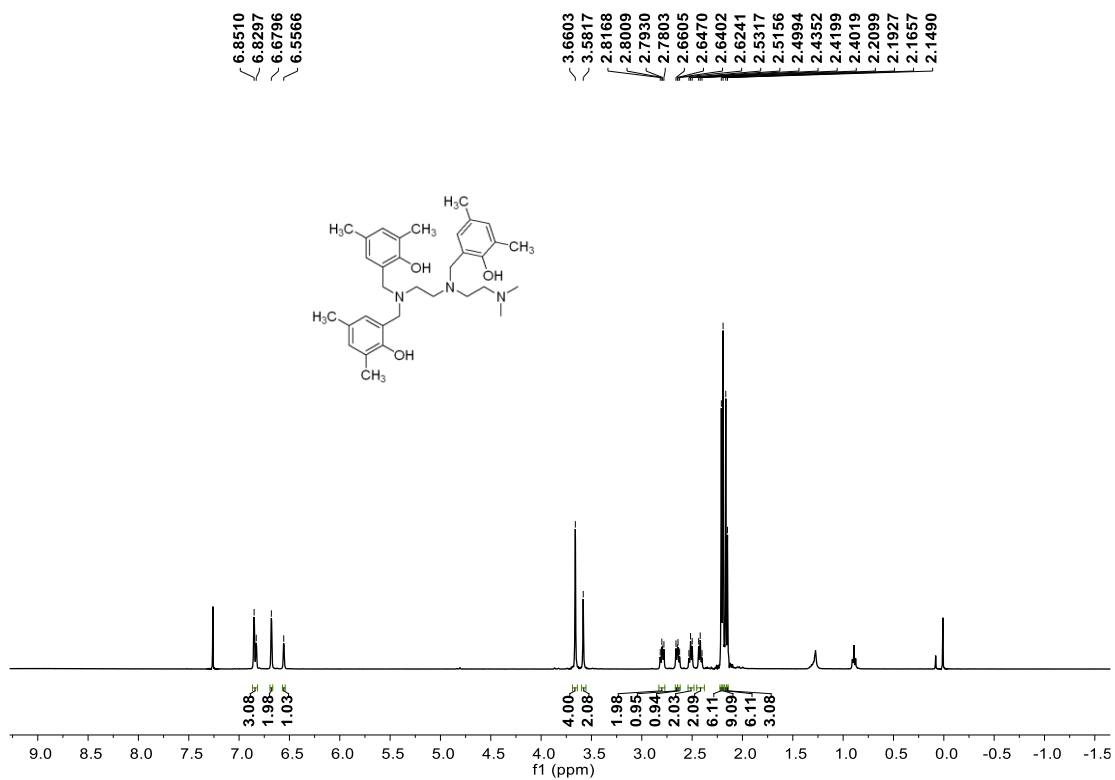

Figure S15.  $^1H$  NMR spectrum of  $L^3H_3$  in  $CDCl_3$

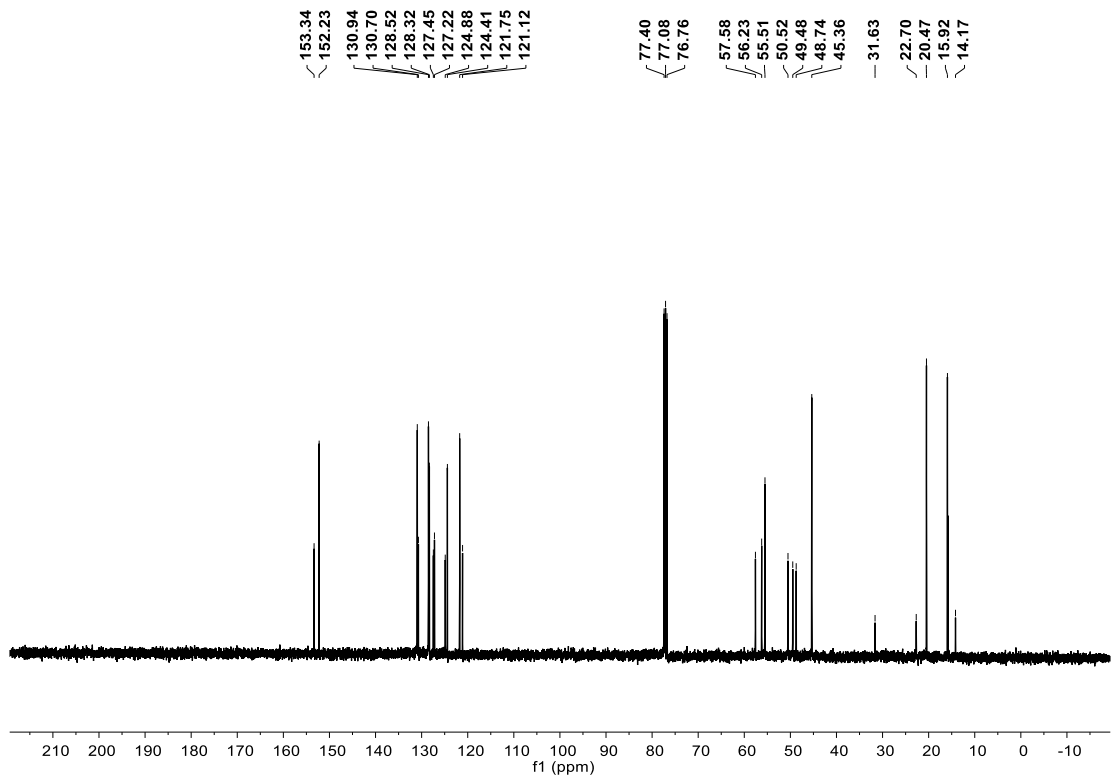

Figure S16.  $^{13}C$  NMR spectrum of  $L^3H_3$  in  $CDCl_3$

## NMR spectra of diamagnetic complexes

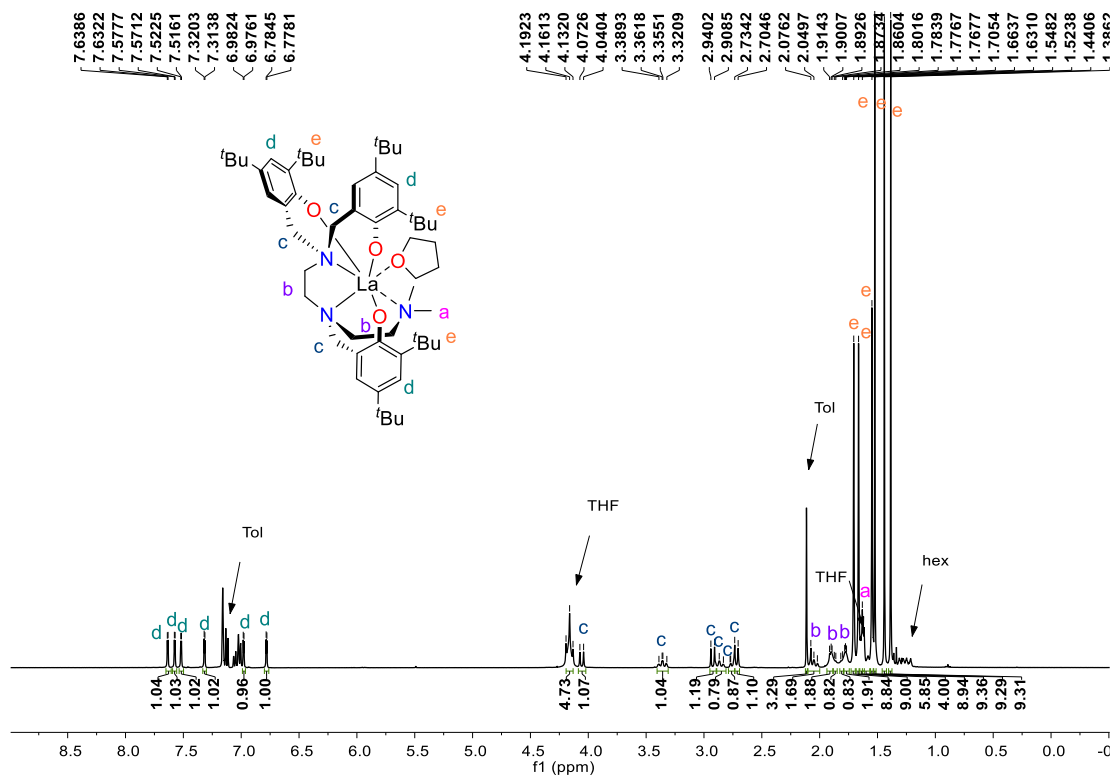

Figure S17. <sup>1</sup>H NMR spectrum of complex 1 in C<sub>6</sub>D<sub>6</sub>

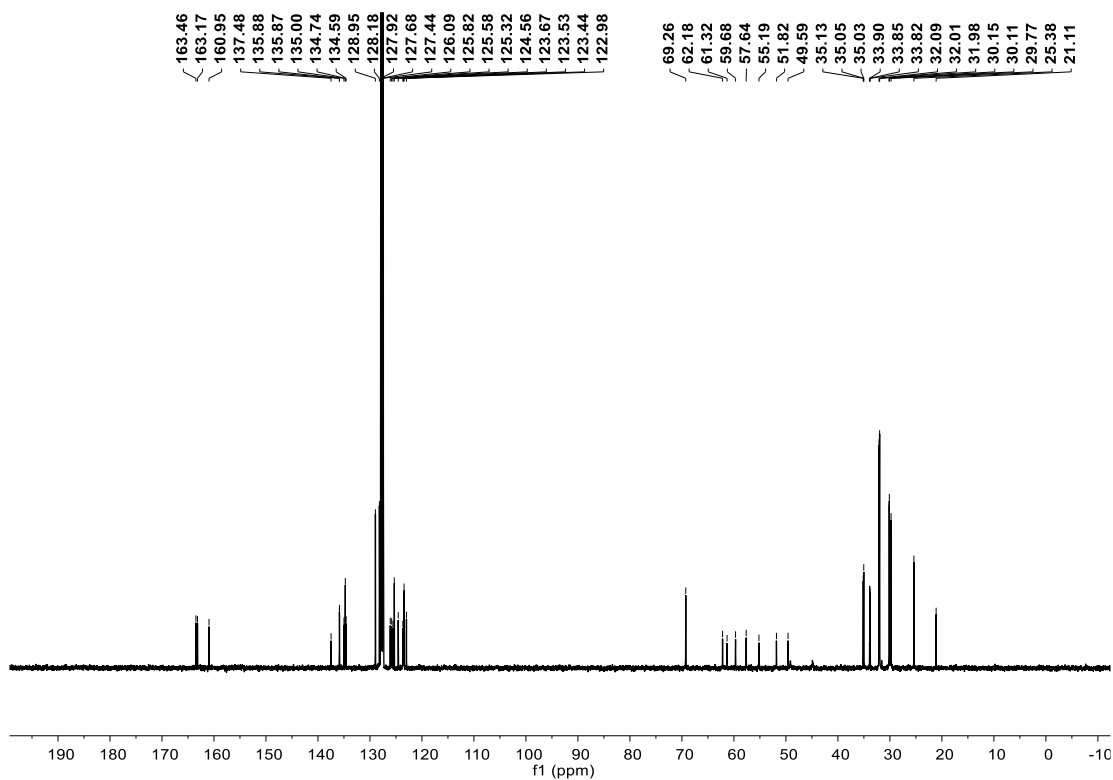

Figure S18. <sup>13</sup>C NMR spectrum of complex 1 in C<sub>6</sub>D<sub>6</sub>

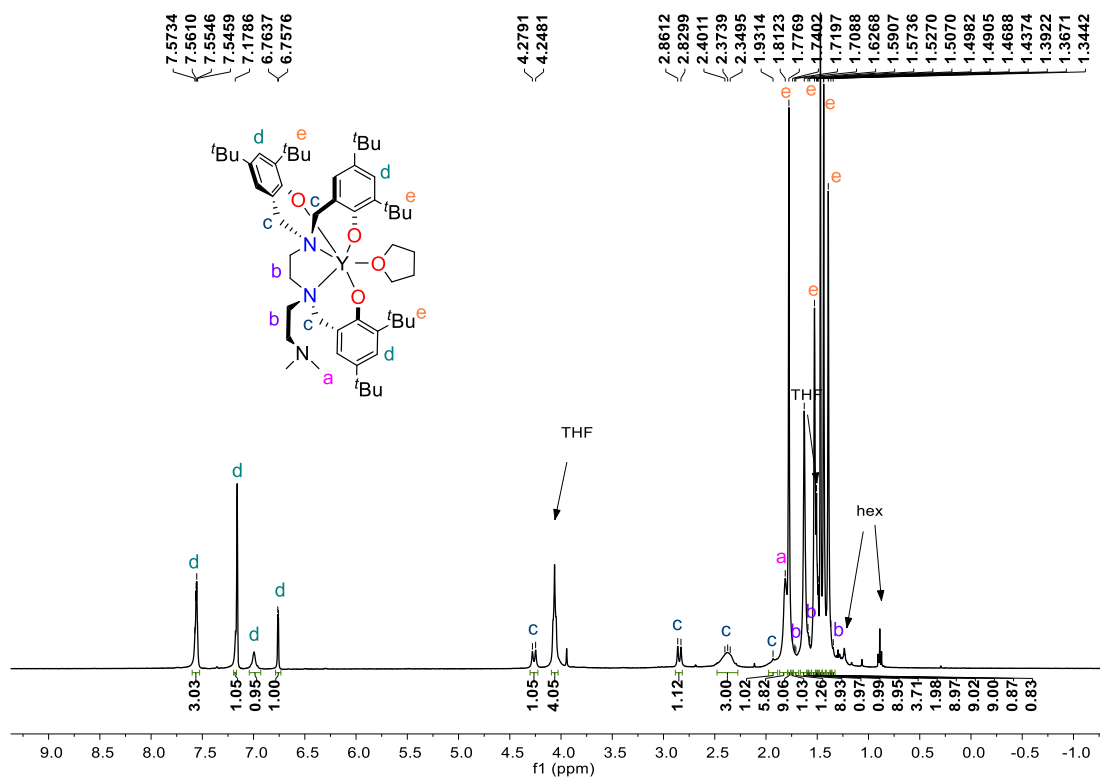

**Figure S19.**  $^1\text{H}$  NMR spectrum of complex **4** in  $\text{C}_6\text{D}_6$

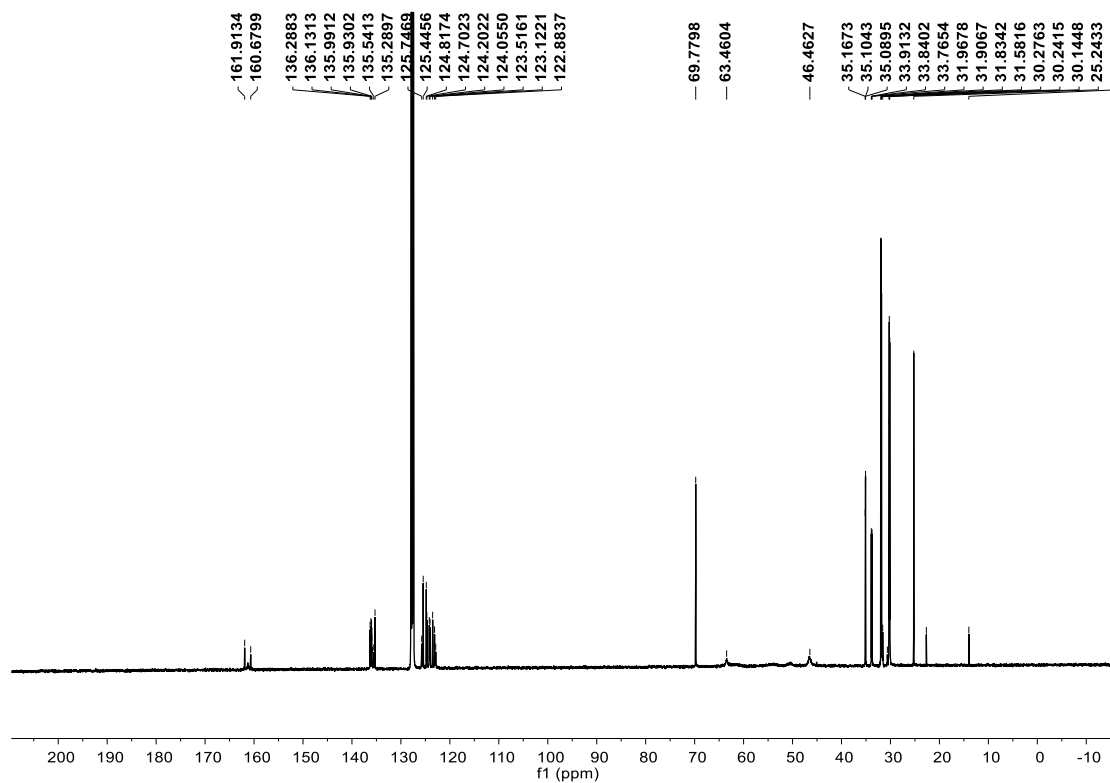

**Figure S20.**  $^{13}\text{C}$  NMR spectrum of complex **4** in  $\text{C}_6\text{D}_6$

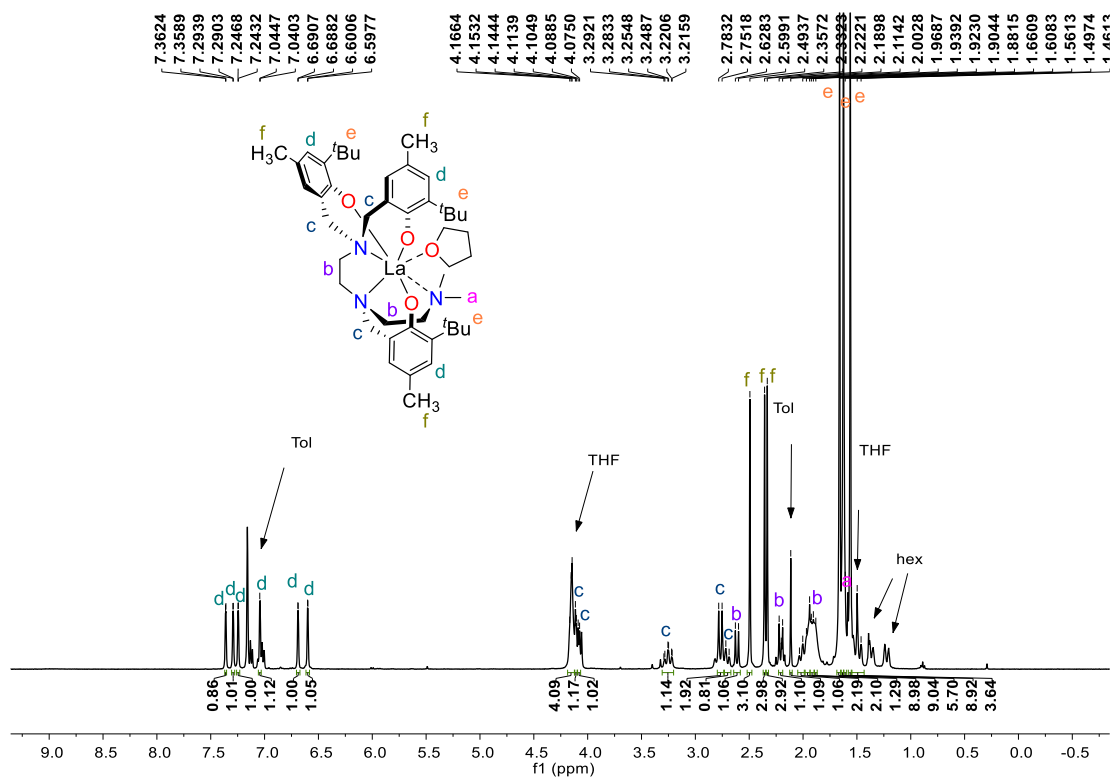

**Figure S21.  $^1\text{H}$  NMR spectrum of complex 5 in  $\text{C}_6\text{D}_6$**

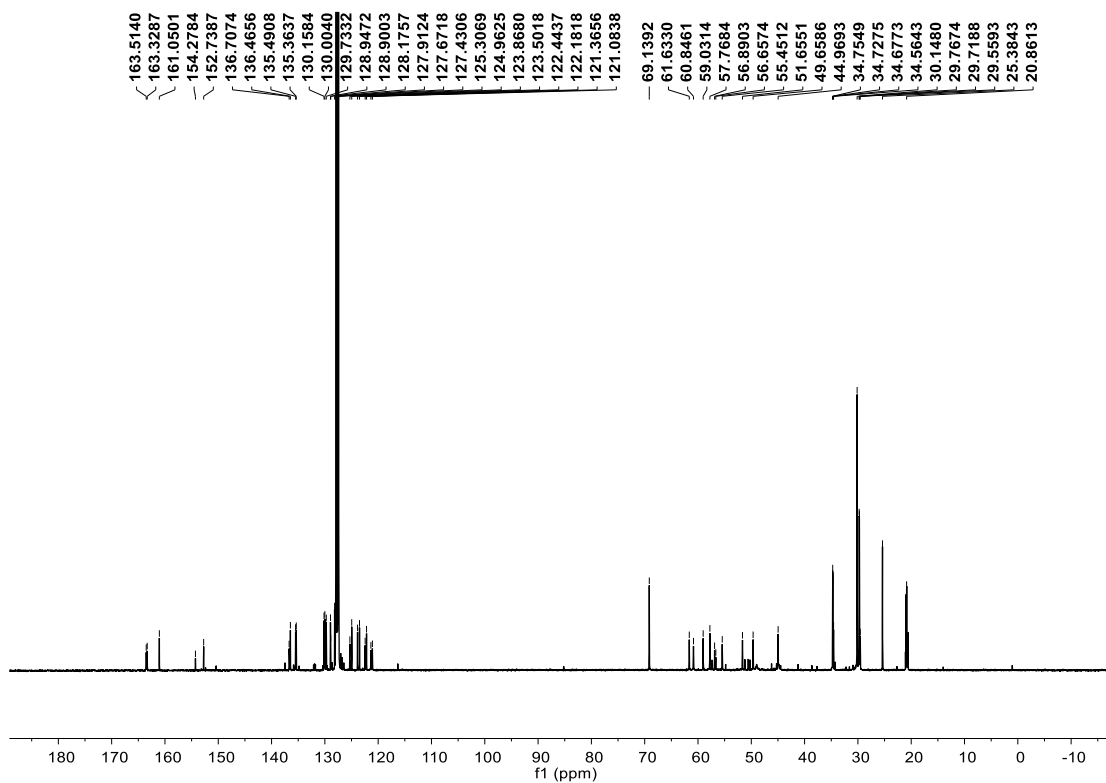

**Figure S22.  $^{13}\text{C}$  NMR spectrum of complex 5 in  $\text{C}_6\text{D}_6$**



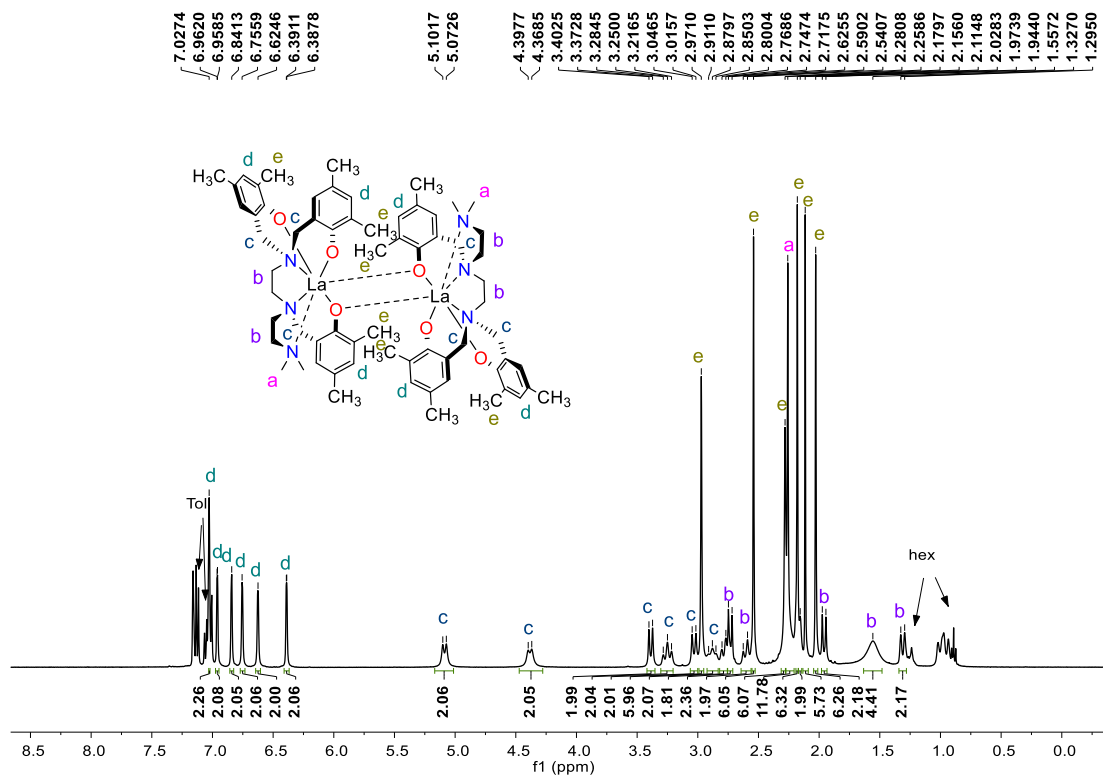

Figure S23.  $^1\text{H}$  NMR spectrum of complex 6 in  $\text{C}_6\text{D}_6$

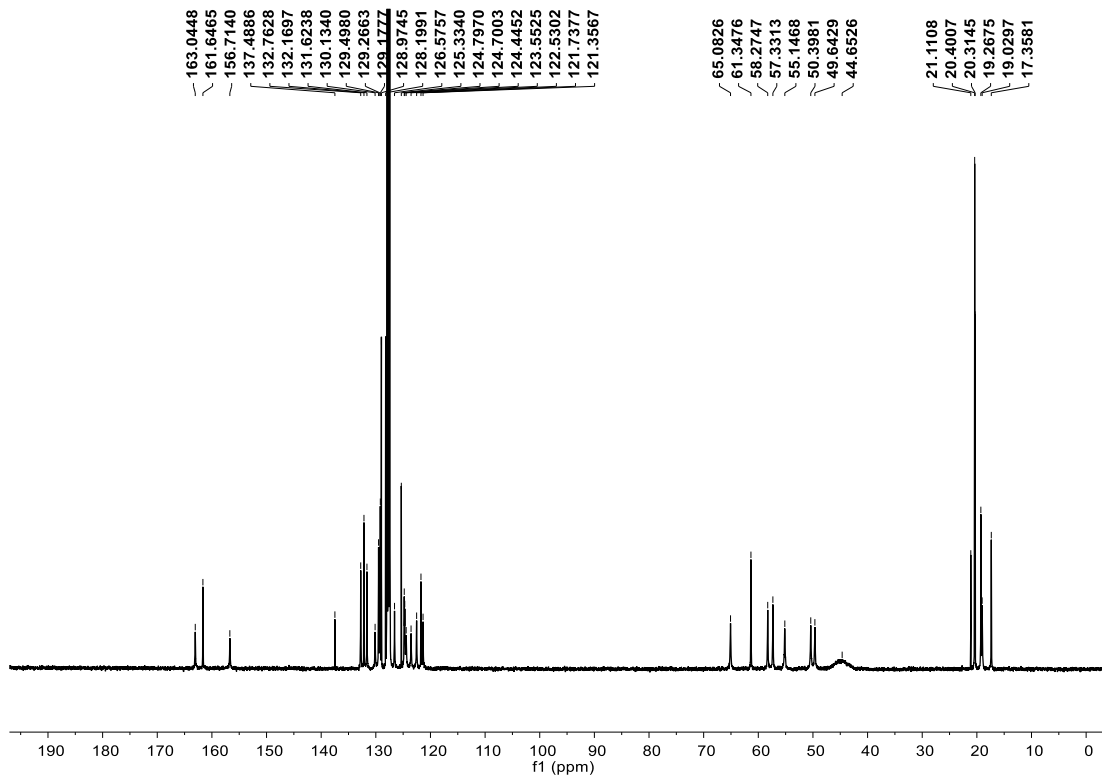

Figure S24.  $^{13}\text{C}$  NMR spectrum of complex 6 in  $\text{C}_6\text{D}_6$

## NMR spectra of cyclic carbonates

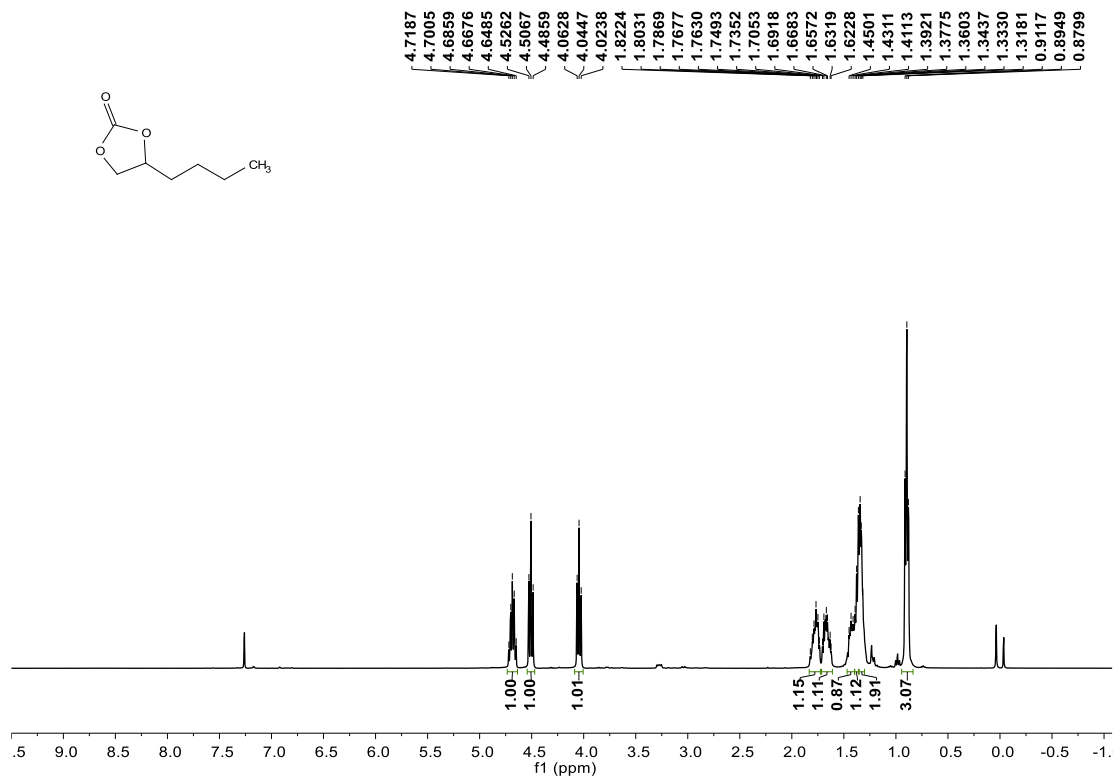

Figure S25. <sup>1</sup>H NMR spectrum of **2a** in CDCl<sub>3</sub>

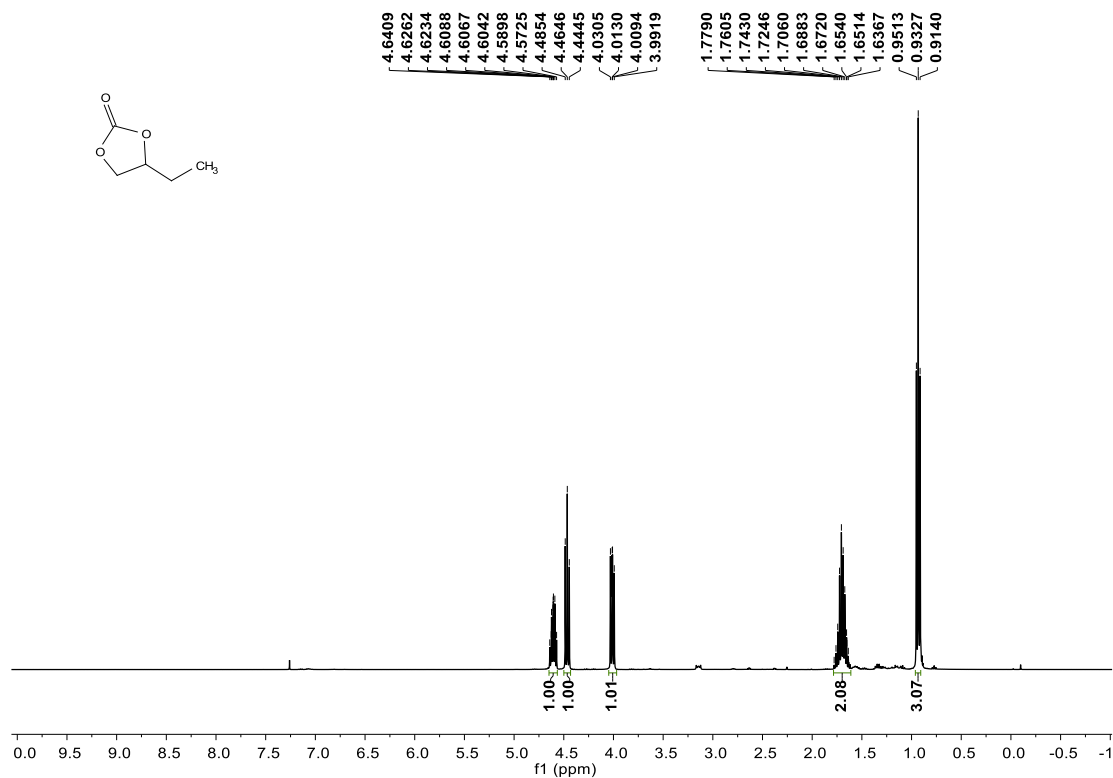

Figure S26. <sup>1</sup>H NMR spectrum of **2b** in CDCl<sub>3</sub>

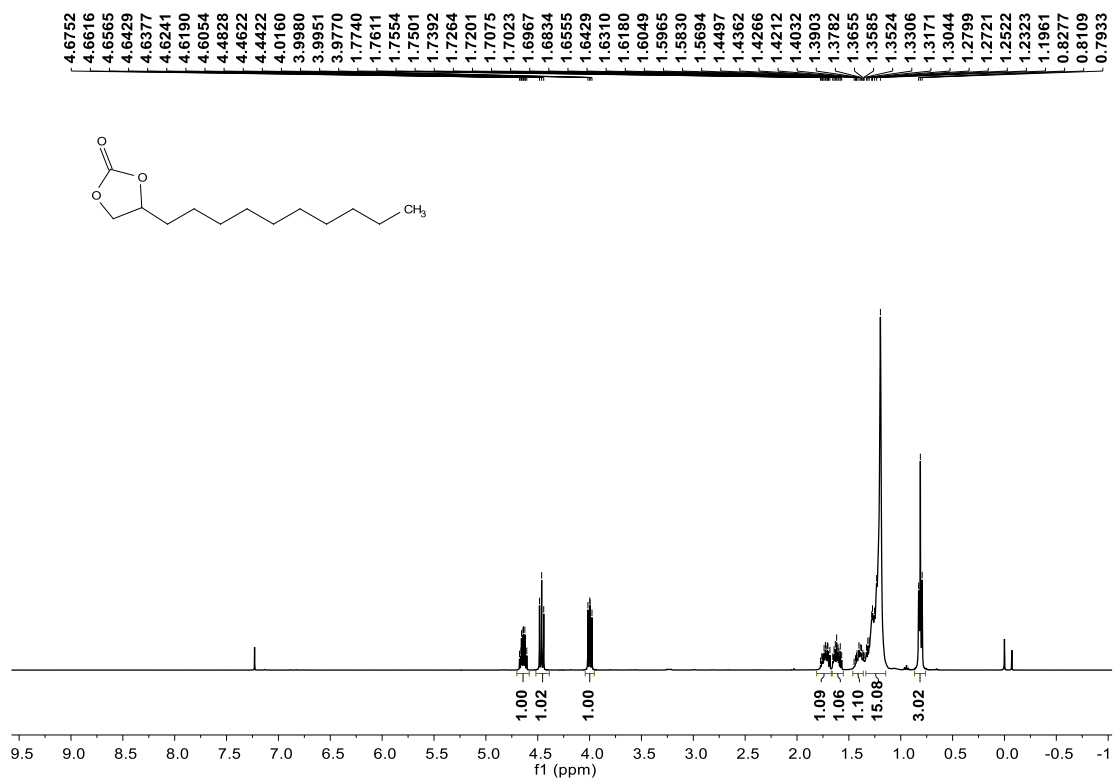

Figure S27. <sup>1</sup>H NMR spectrum of **2c** in CDCl<sub>3</sub>

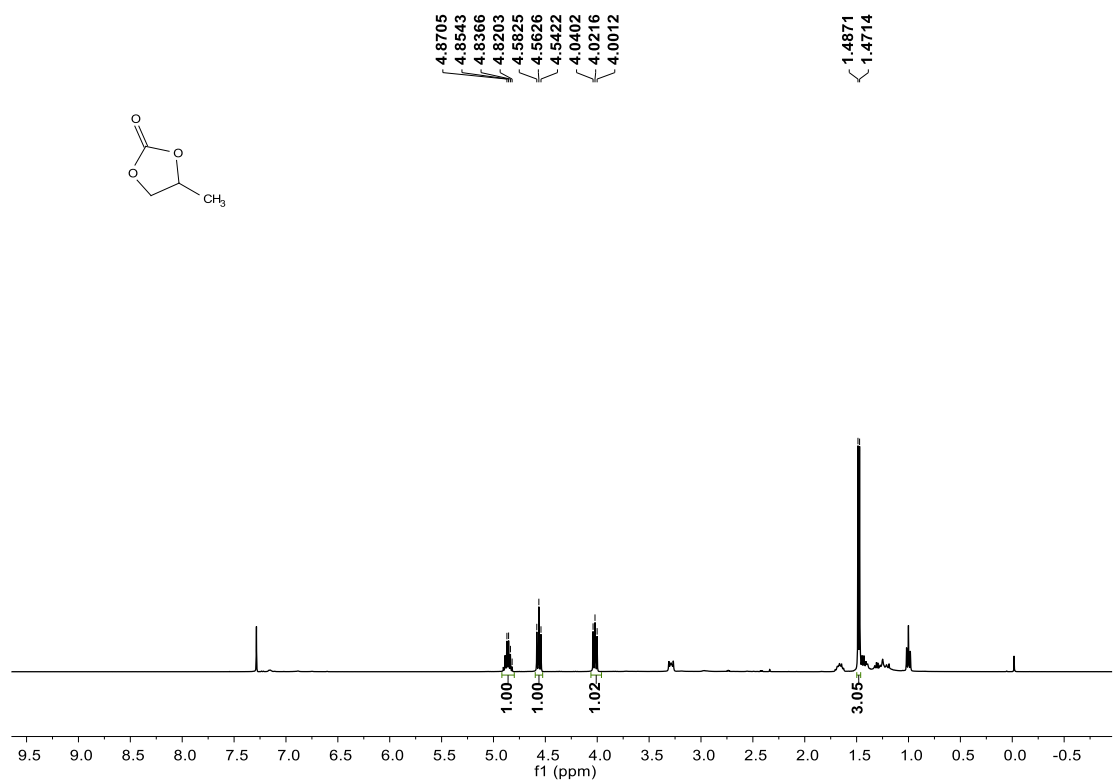

Figure S28. <sup>1</sup>H NMR spectrum of **2d** in CDCl<sub>3</sub>

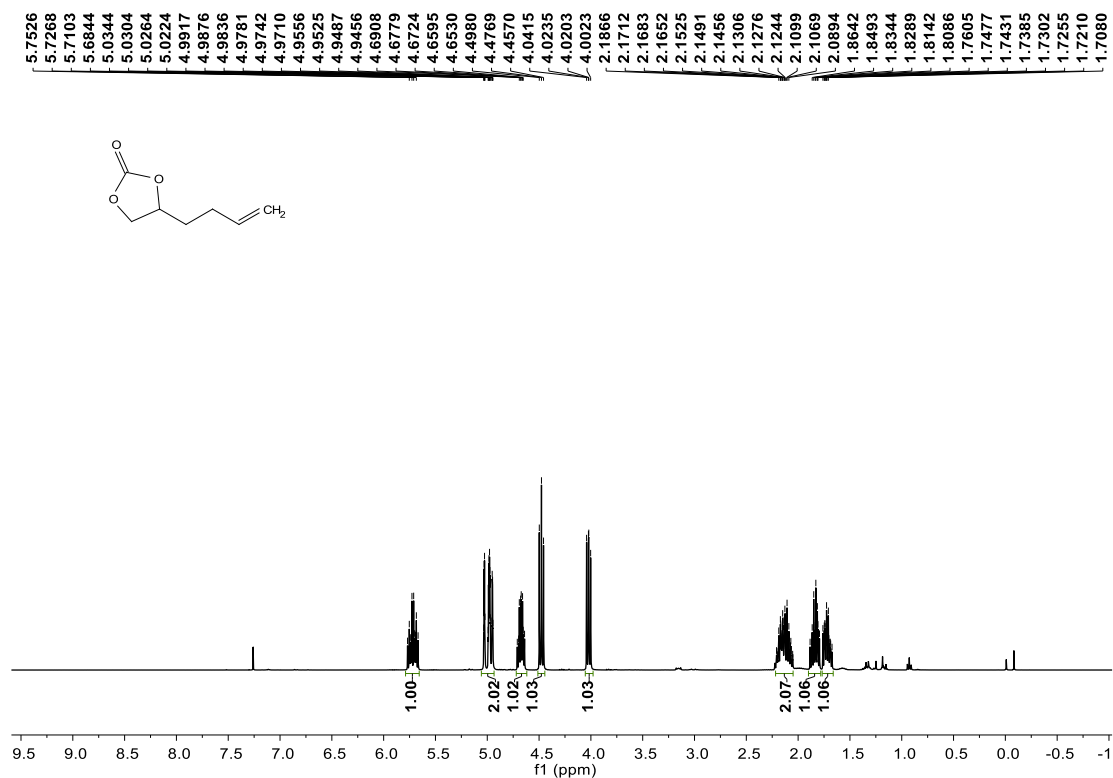

Figure S29. <sup>1</sup>H NMR spectrum of 2e in CDCl<sub>3</sub>

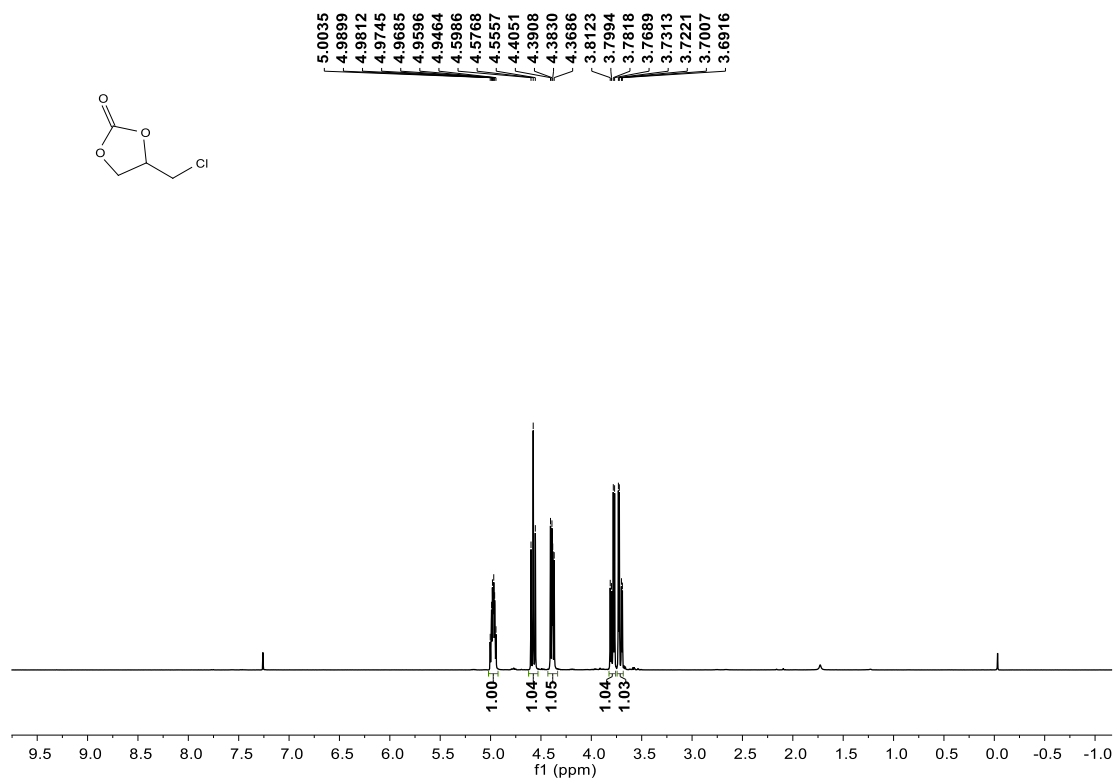

Figure S30. <sup>1</sup>H NMR spectrum of 2f in CDCl<sub>3</sub>

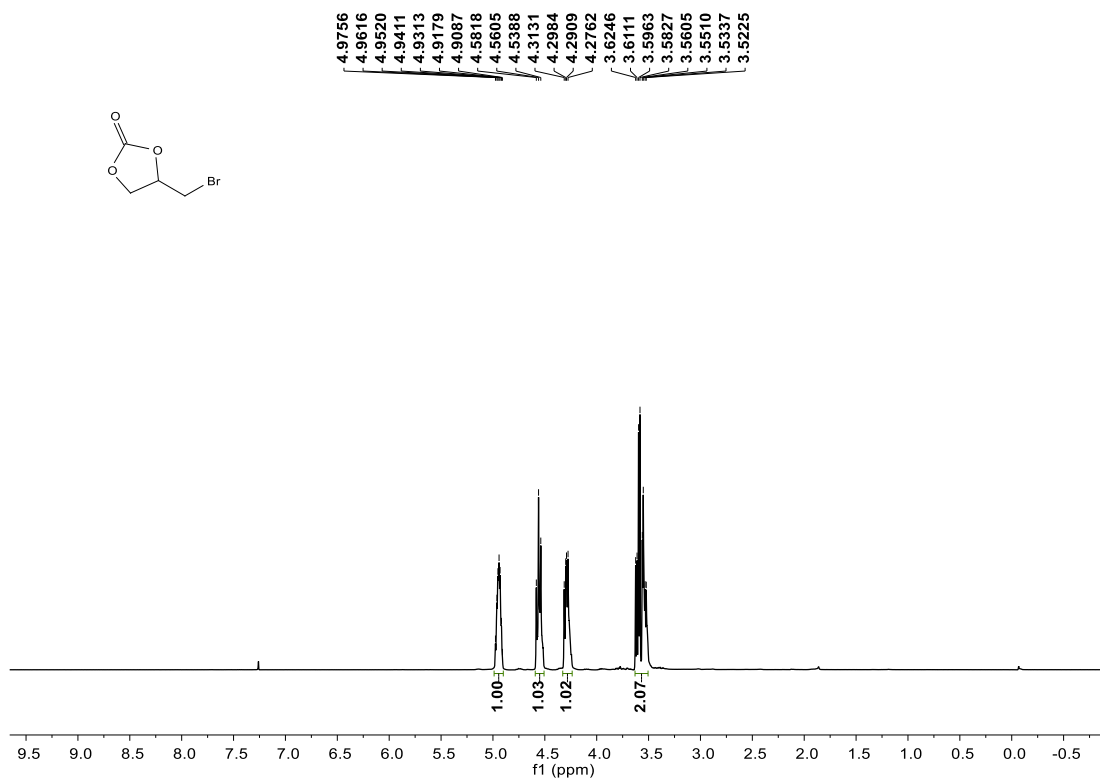

**Figure S31.** <sup>1</sup>H NMR spectrum of **2g** in CDCl<sub>3</sub>

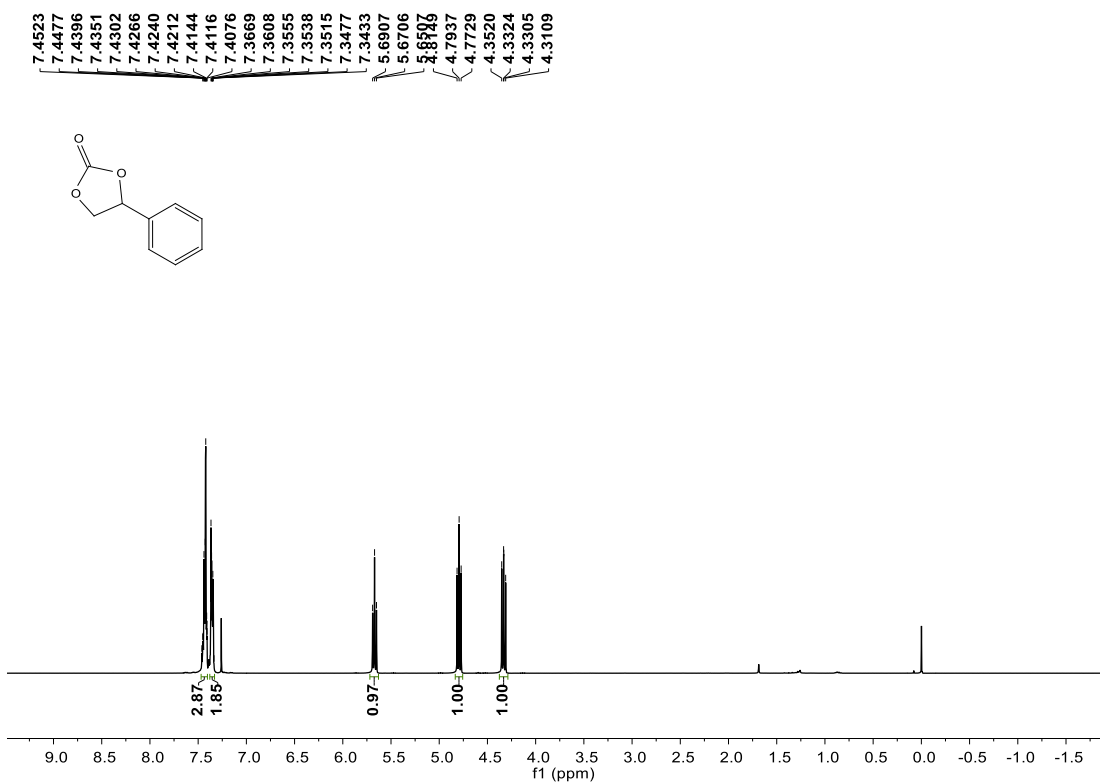

**Figure S32.** <sup>1</sup>H NMR spectrum of **2h** in CDCl<sub>3</sub>

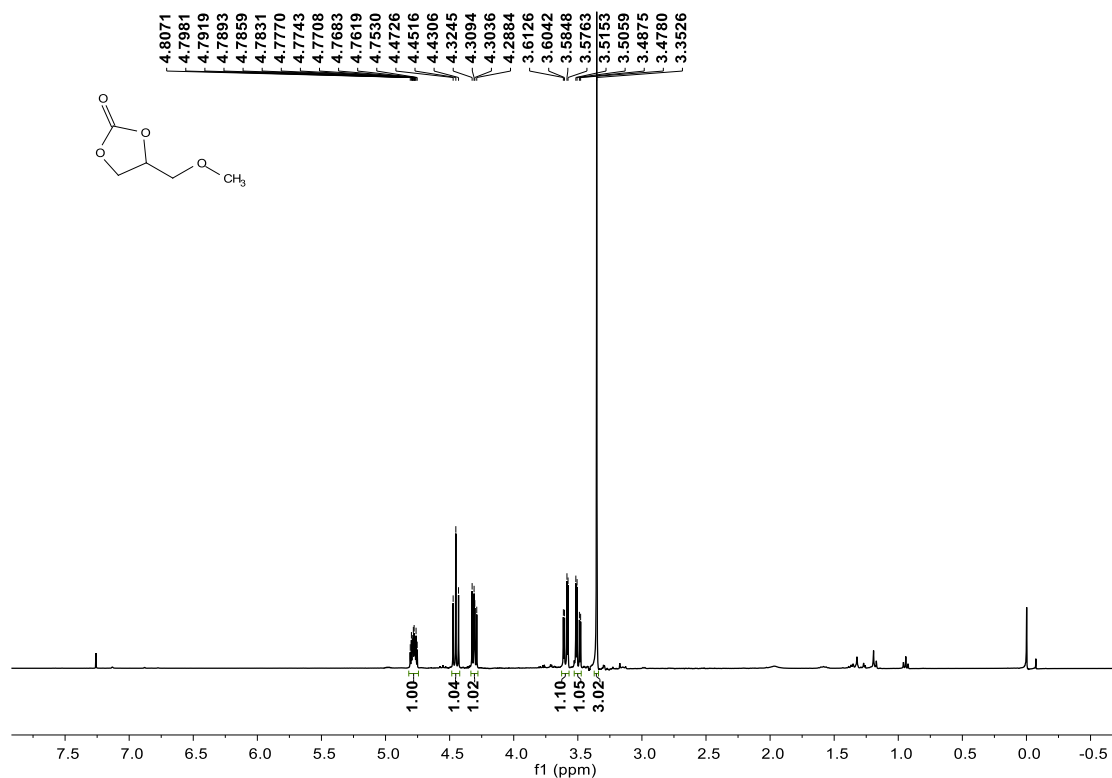

Figure S33. <sup>1</sup>H NMR spectrum of **2i** in CDCl<sub>3</sub>

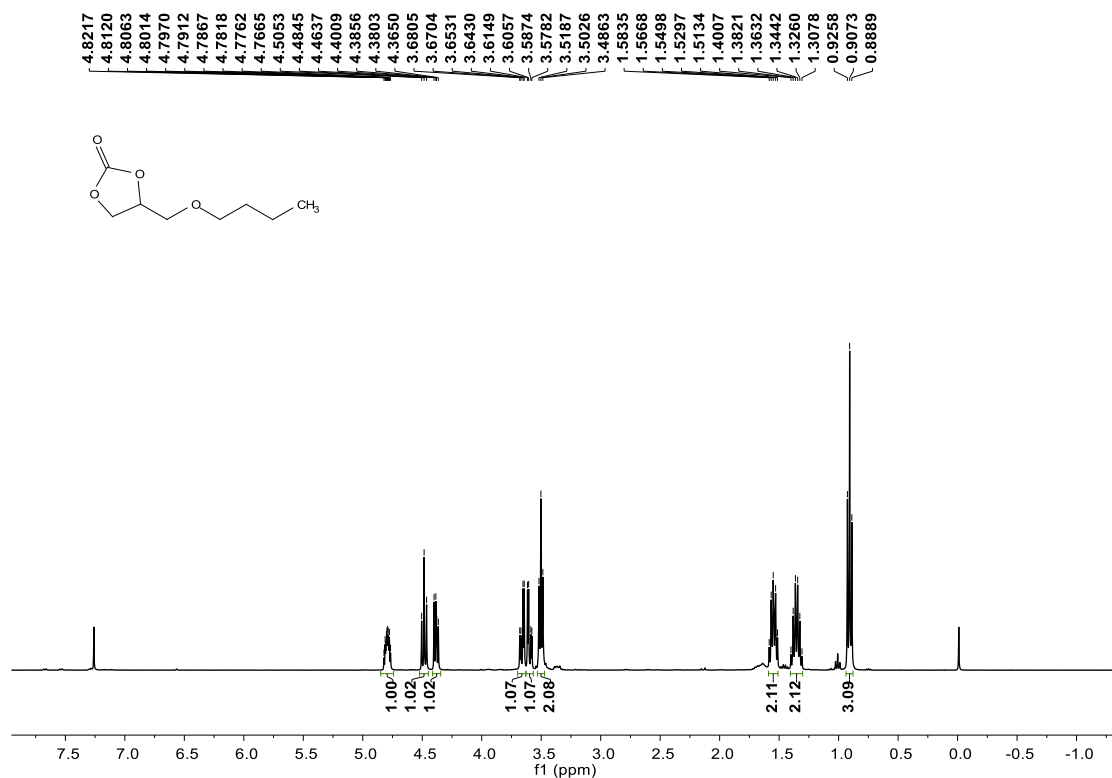

Figure S34. <sup>1</sup>H NMR spectrum of **2j** in CDCl<sub>3</sub>

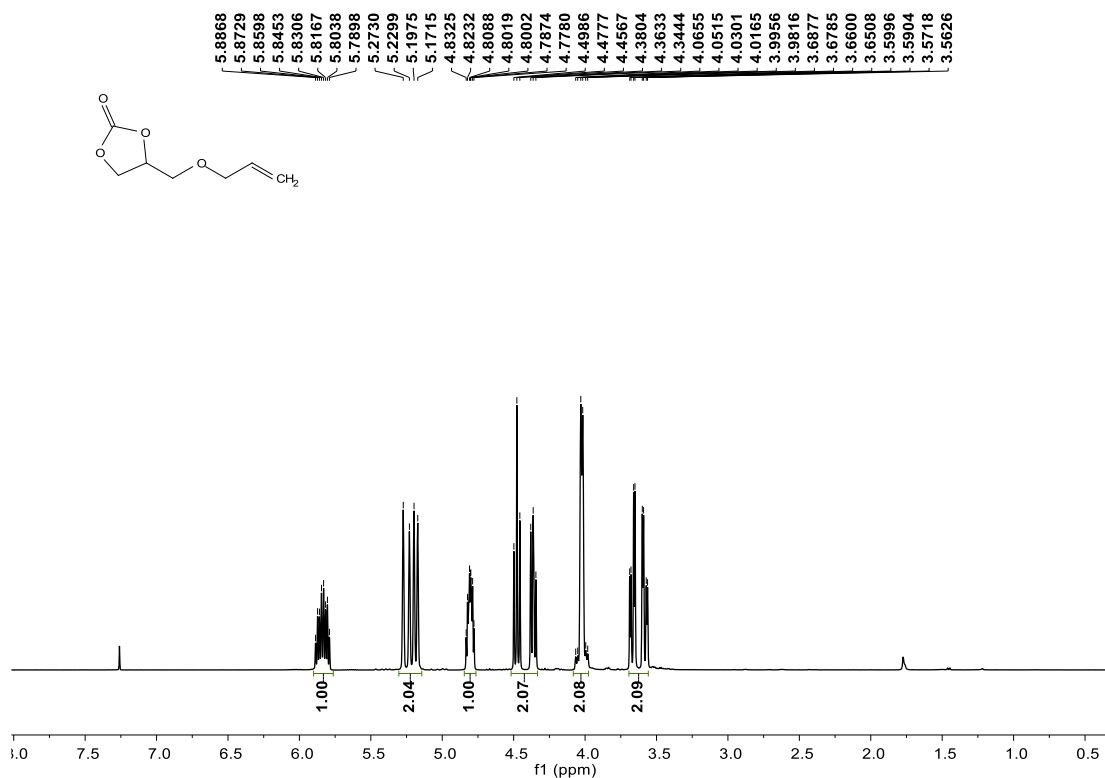

Figure S35. <sup>1</sup>H NMR spectrum of **2k** in CDCl<sub>3</sub>

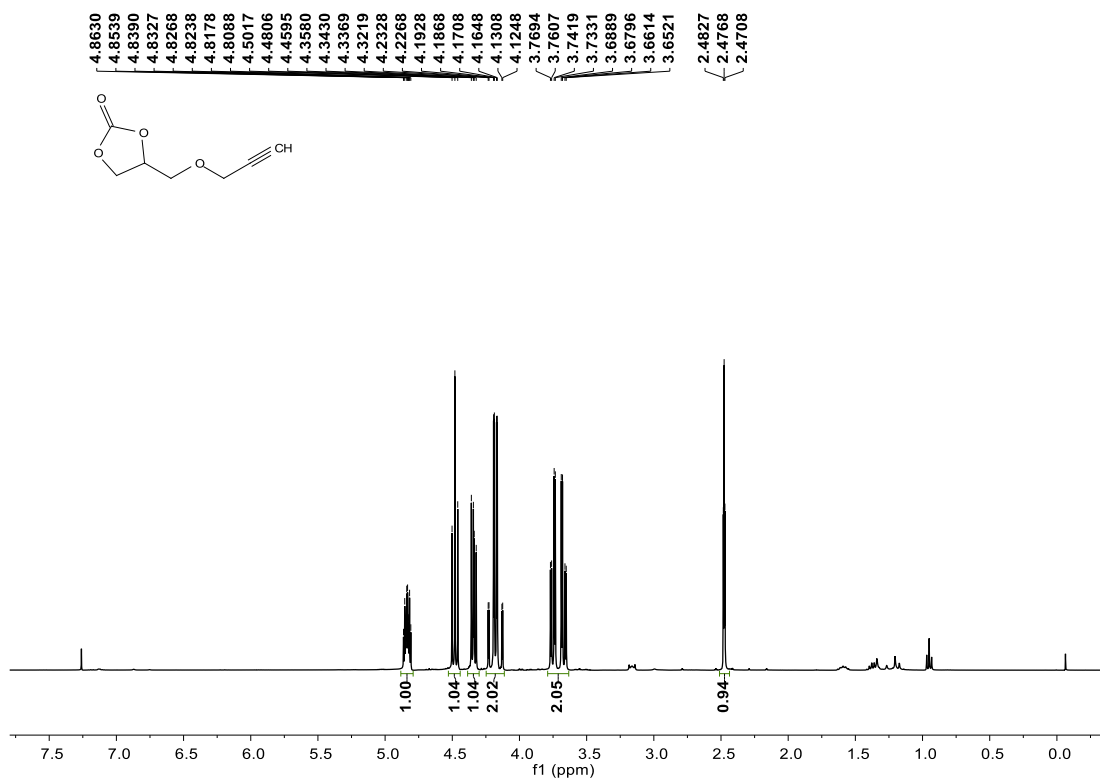

Figure S36. <sup>1</sup>H NMR spectrum of **2l** in CDCl<sub>3</sub>

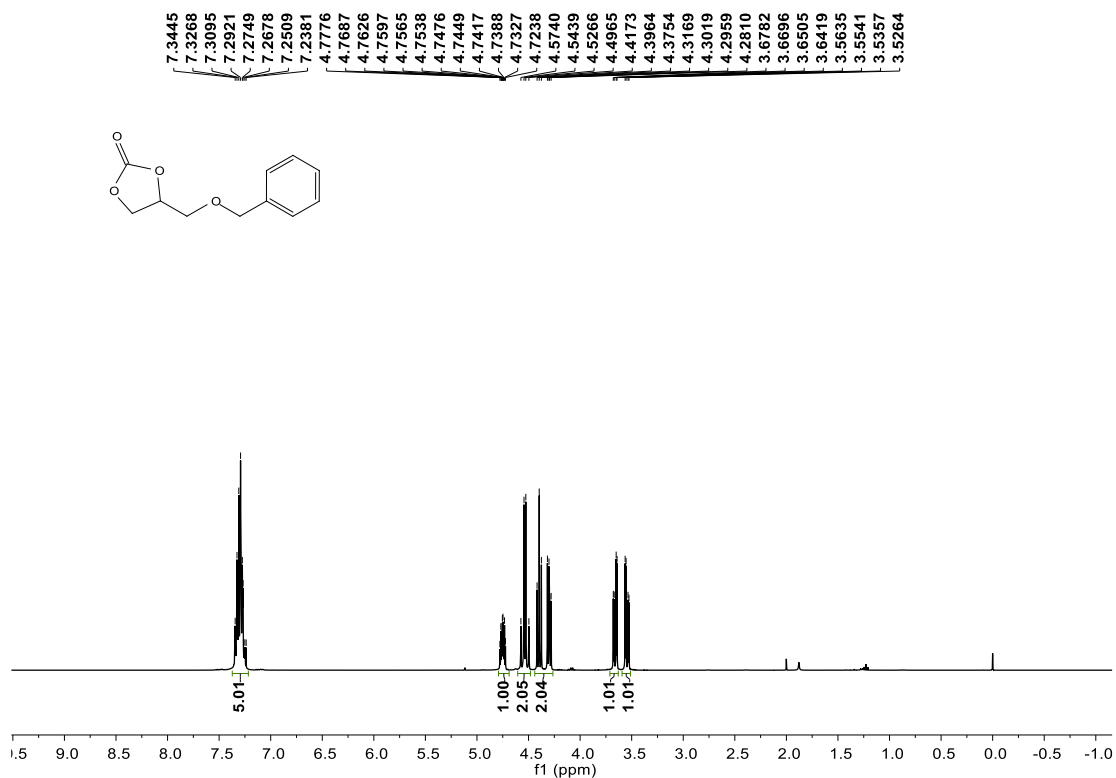

**Figure S37.** <sup>1</sup>H NMR spectrum of **2m** in CDCl<sub>3</sub>

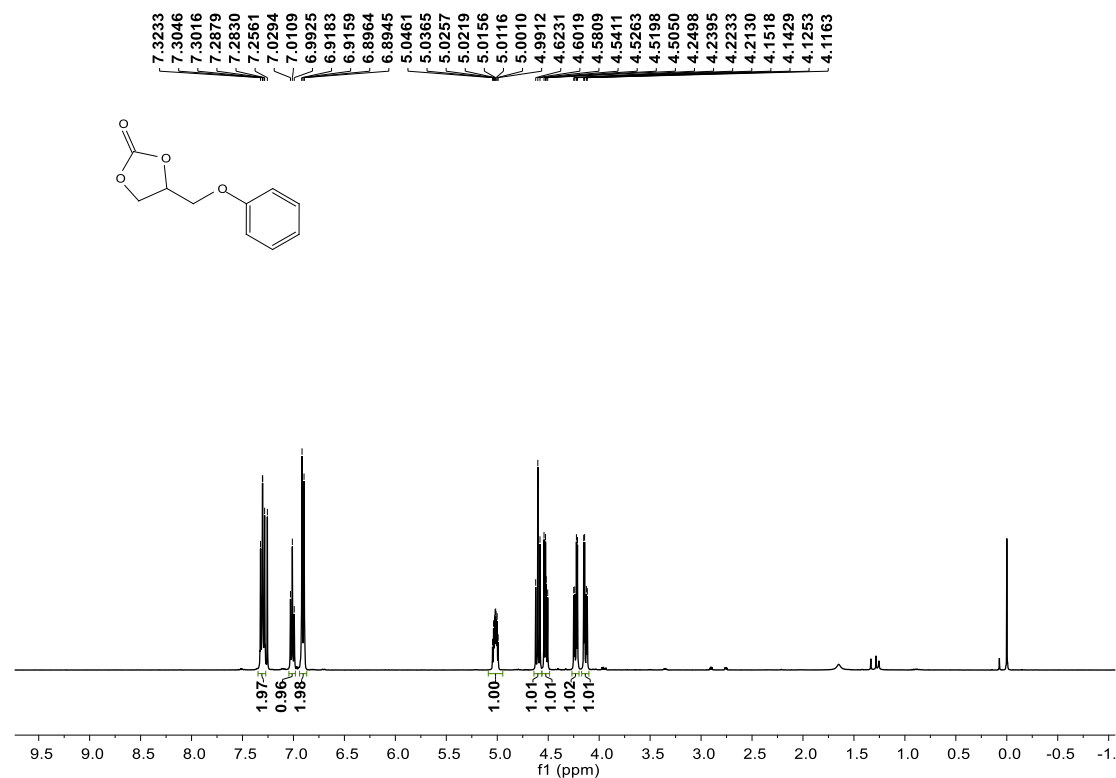

**Figure S38.** <sup>1</sup>H NMR spectrum of **2n** in CDCl<sub>3</sub>



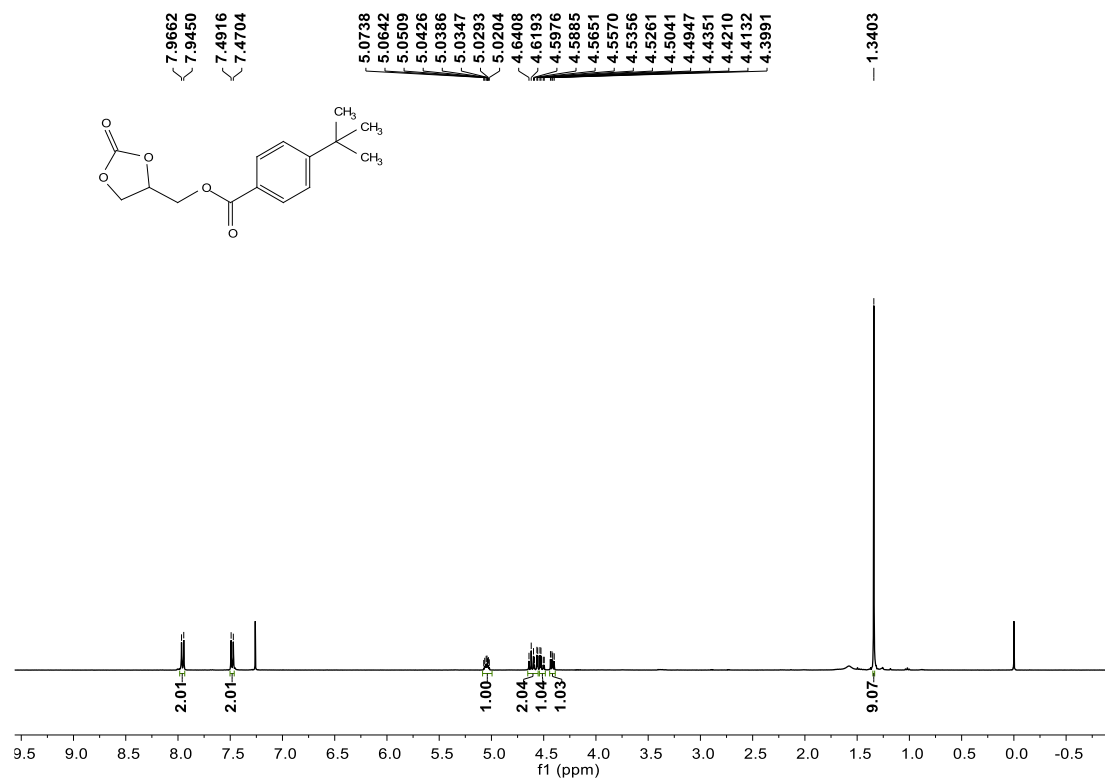

**Figure S39.** <sup>1</sup>H NMR spectrum of **2o** in CDCl<sub>3</sub>

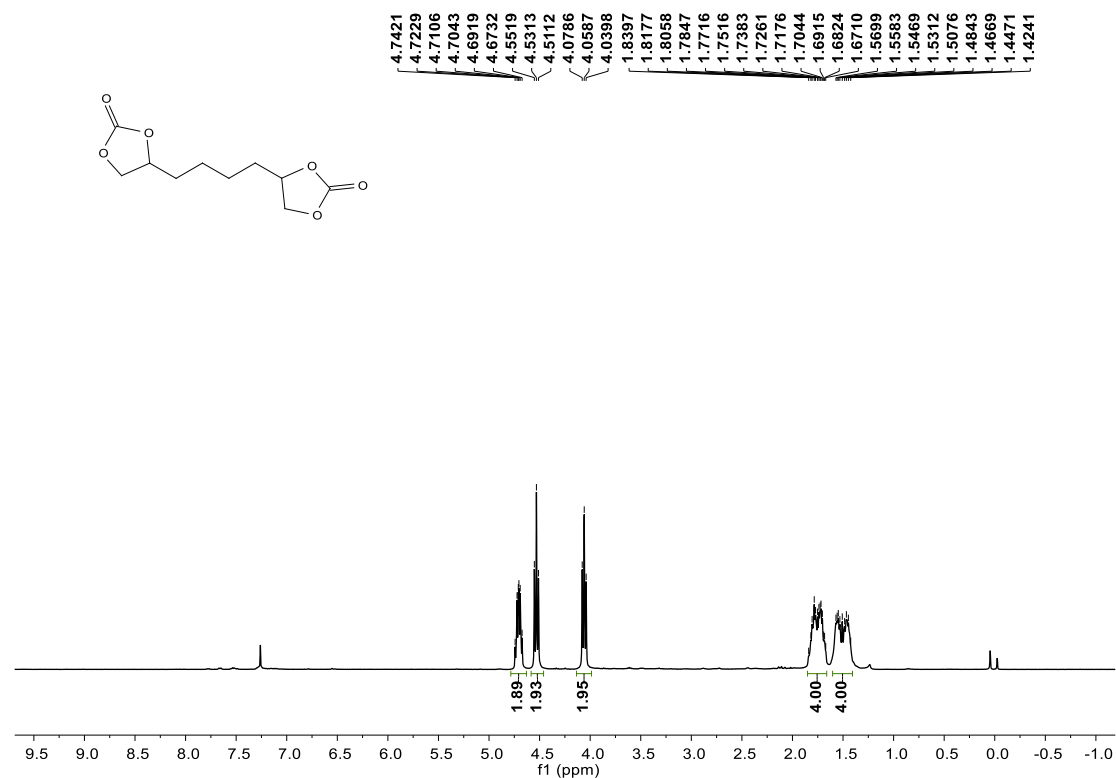

**Figure S40.** <sup>1</sup>H NMR spectrum of **2p** in CDCl<sub>3</sub>

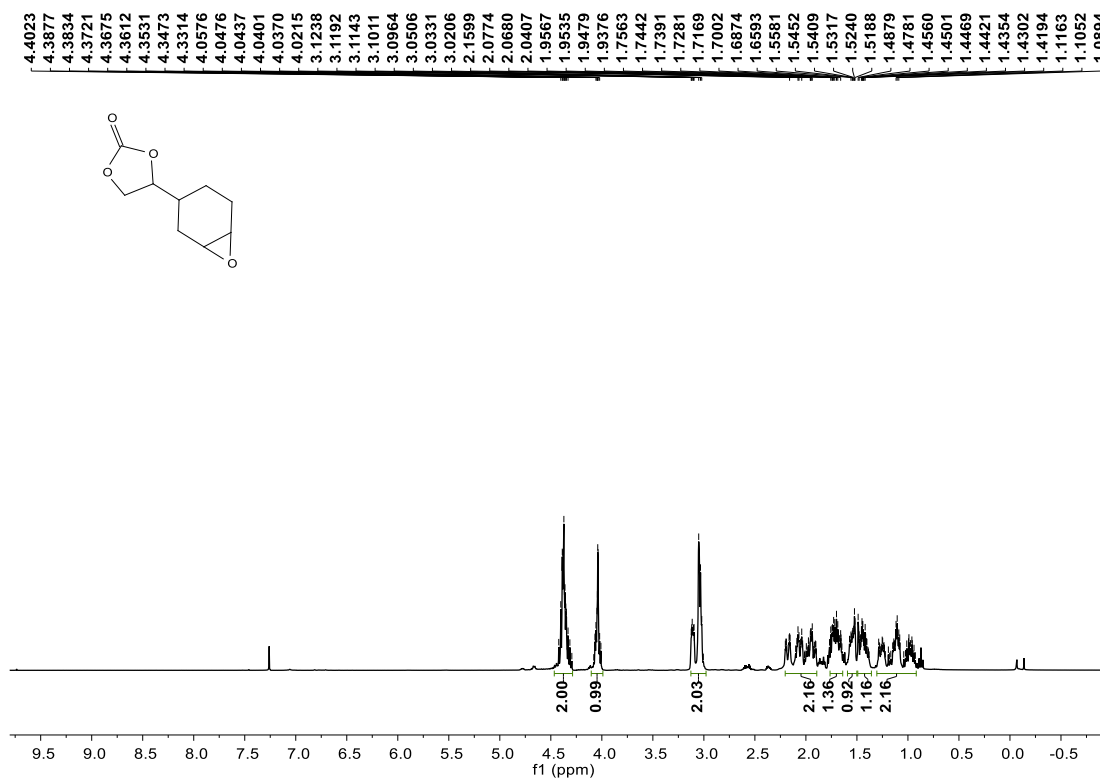

Figure S41.  $^1\text{H}$  NMR spectrum of **2q** in  $\text{CDCl}_3$

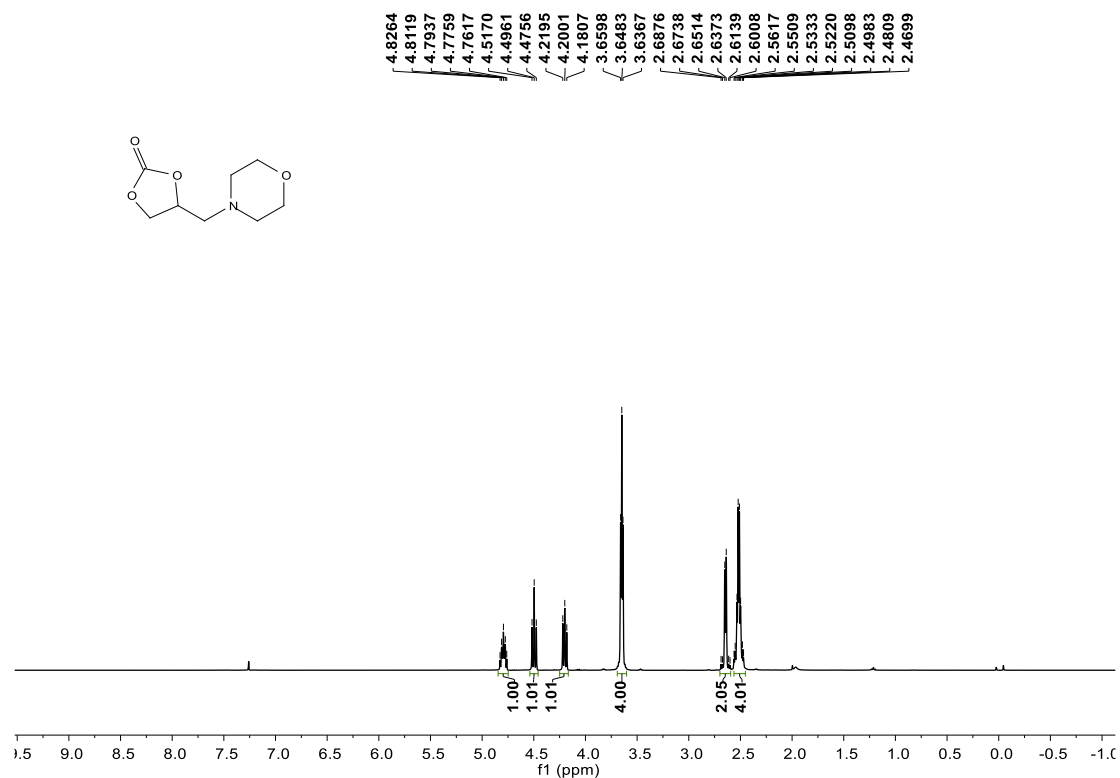

Figure S42.  $^1\text{H}$  NMR spectrum of **2r** in  $\text{CDCl}_3$

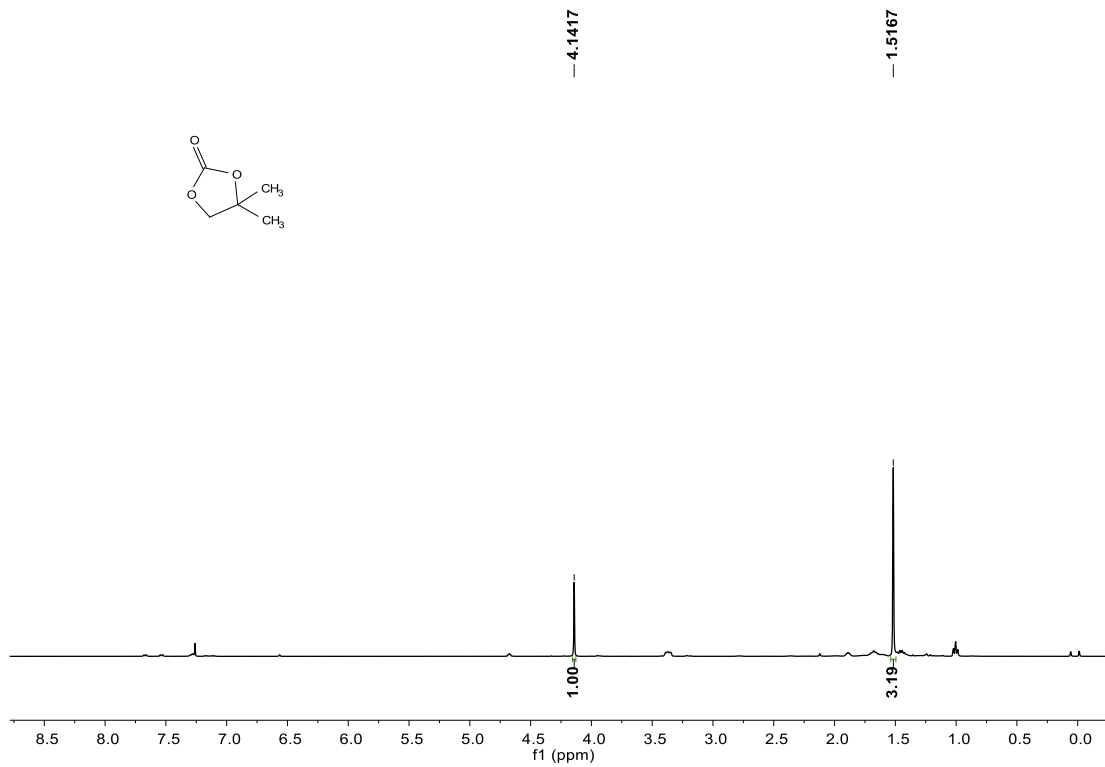

Figure S43.  $^1\text{H}$  NMR spectrum of **4a** in  $\text{CDCl}_3$

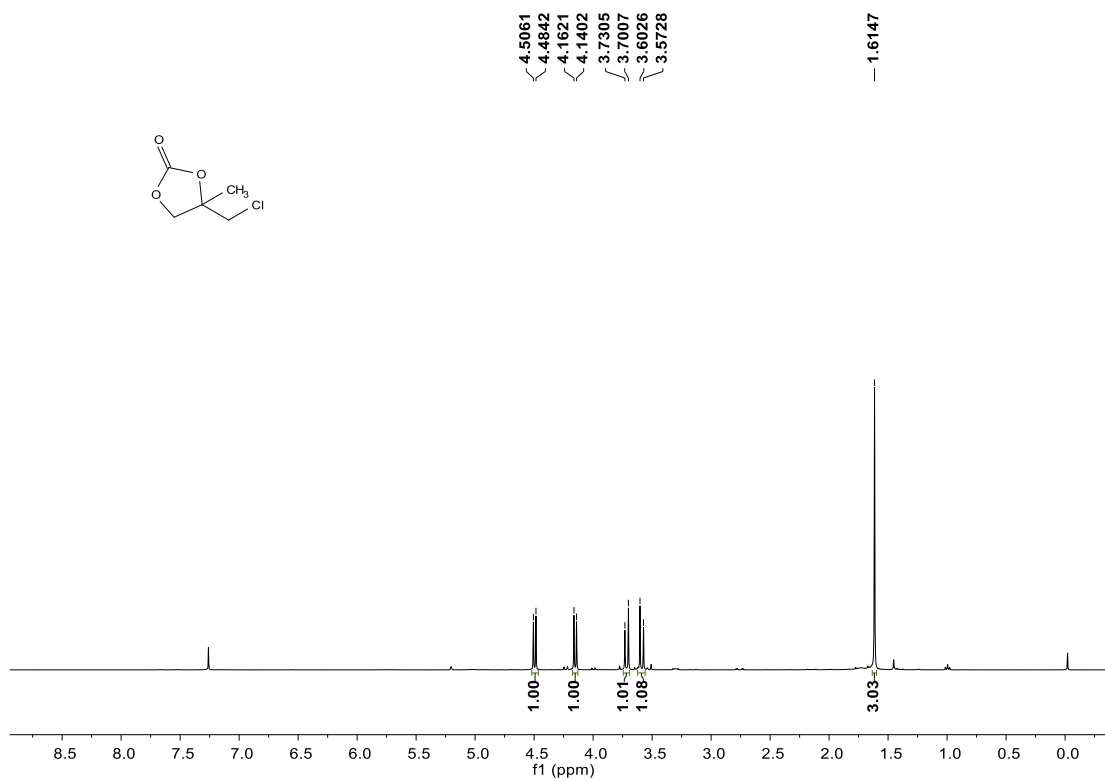

Figure S44.  $^1\text{H}$  NMR spectrum of **4b** in  $\text{CDCl}_3$

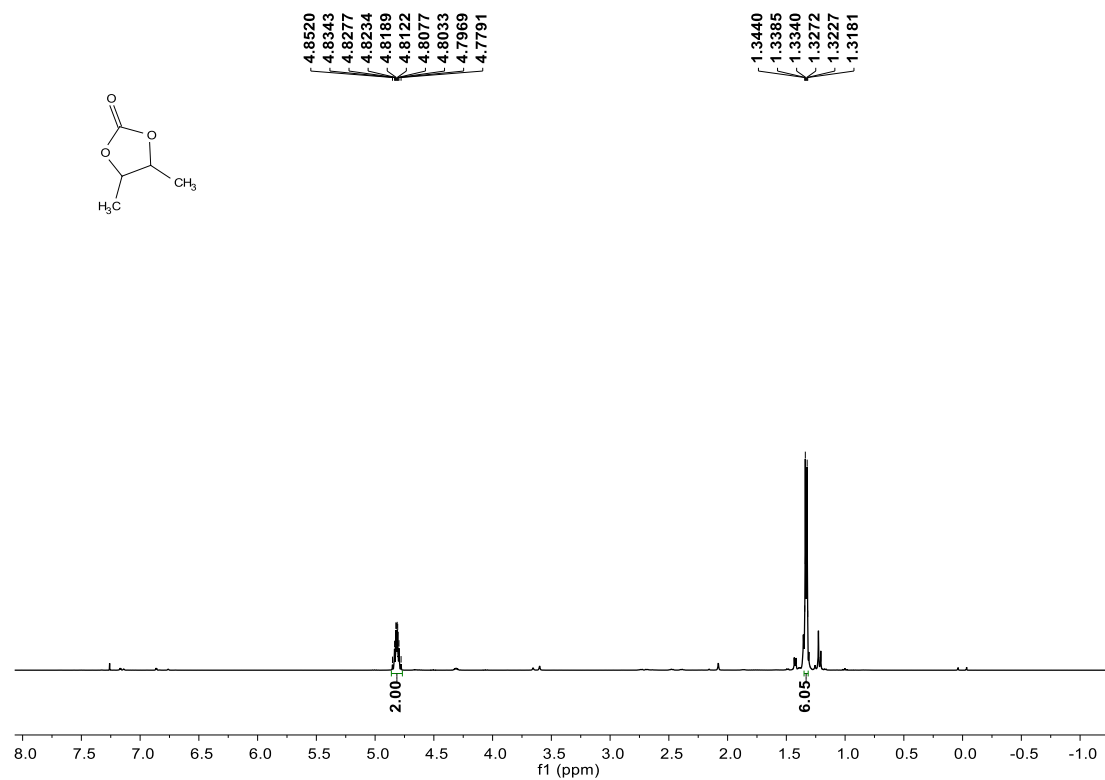

Figure S45. <sup>1</sup>H NMR spectrum of *cis*-4c in CDCl<sub>3</sub>

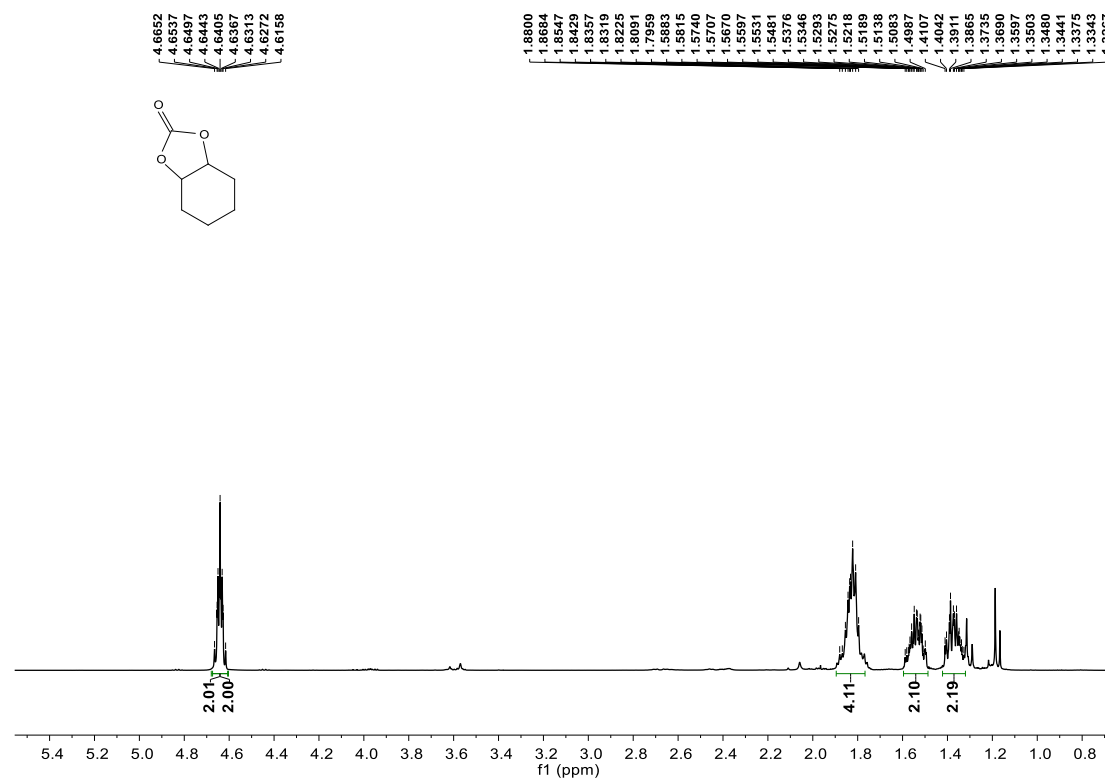

Figure S46. <sup>1</sup>H NMR spectrum of *cis*-4d in CDCl<sub>3</sub>

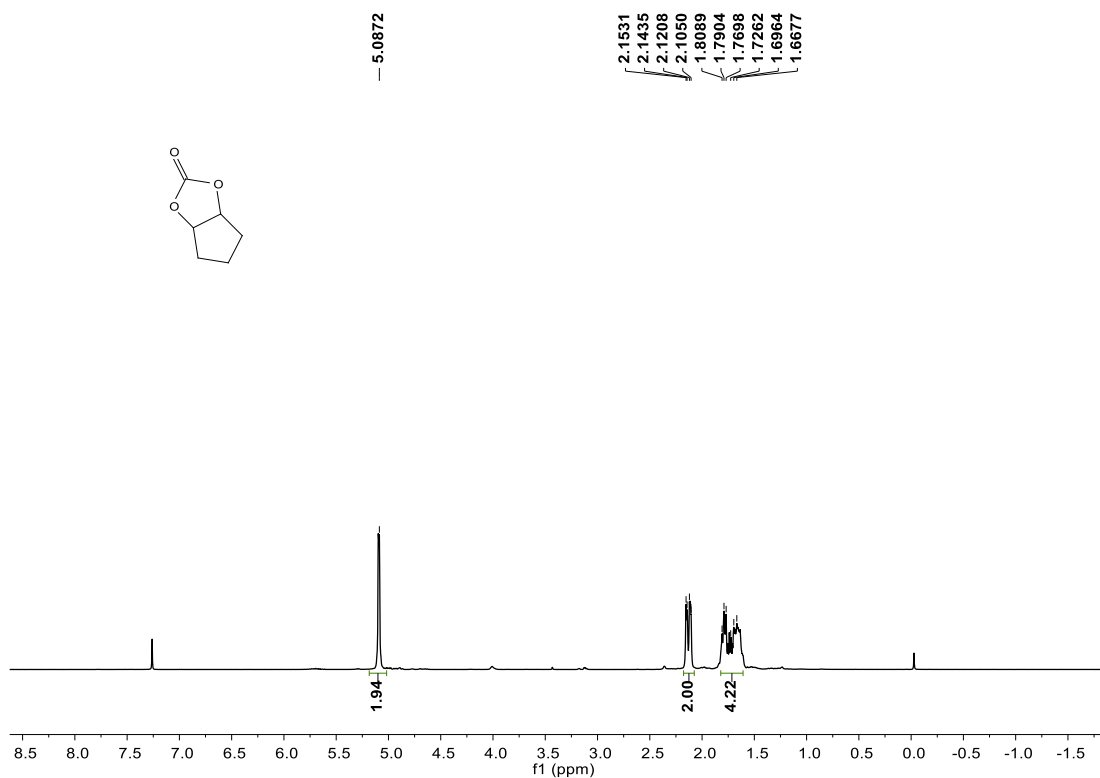

Figure S47.  $^1\text{H}$  NMR spectrum of *cis-4e* in  $\text{CDCl}_3$

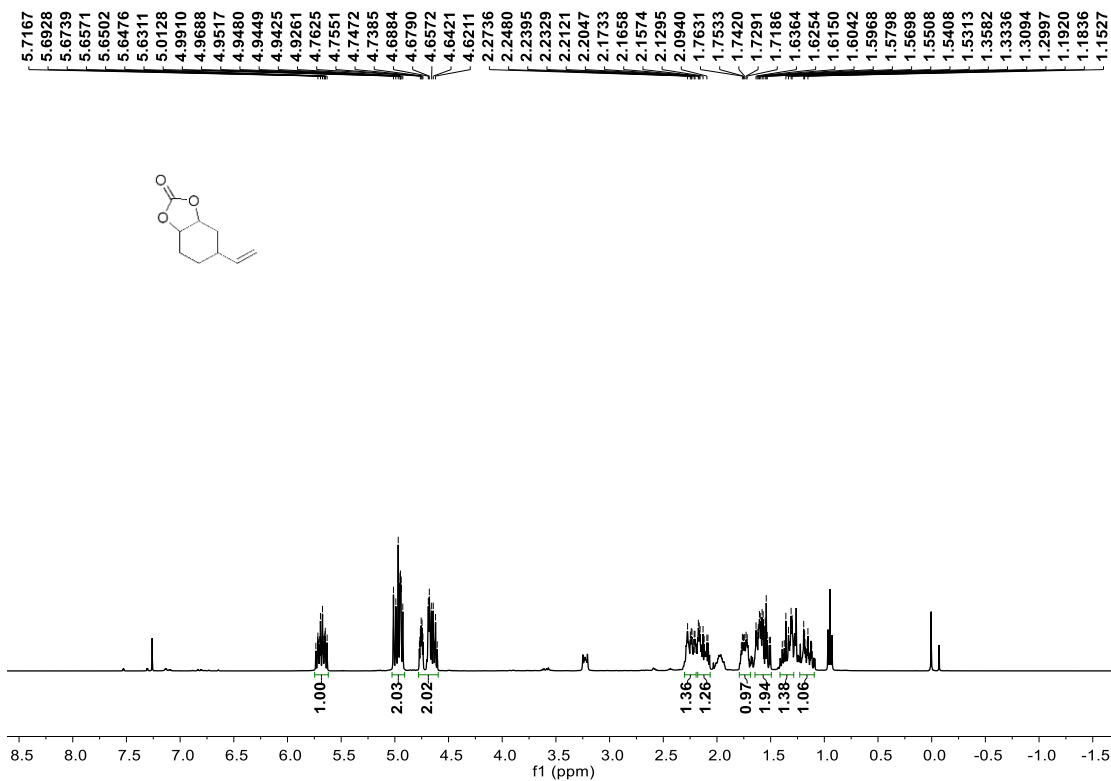

Figure S48.  $^1\text{H}$  NMR spectrum of *cis-4f* in  $\text{CDCl}_3$

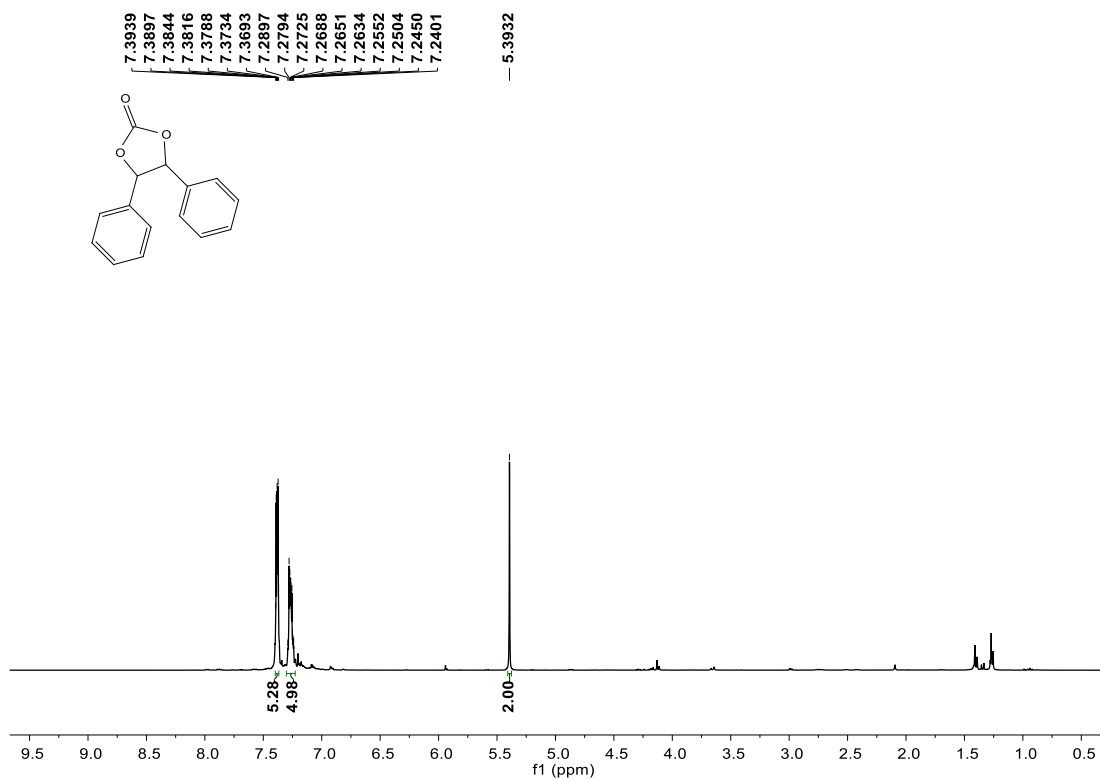

Figure S49. <sup>1</sup>H NMR spectrum of *trans*-4g in CDCl<sub>3</sub>

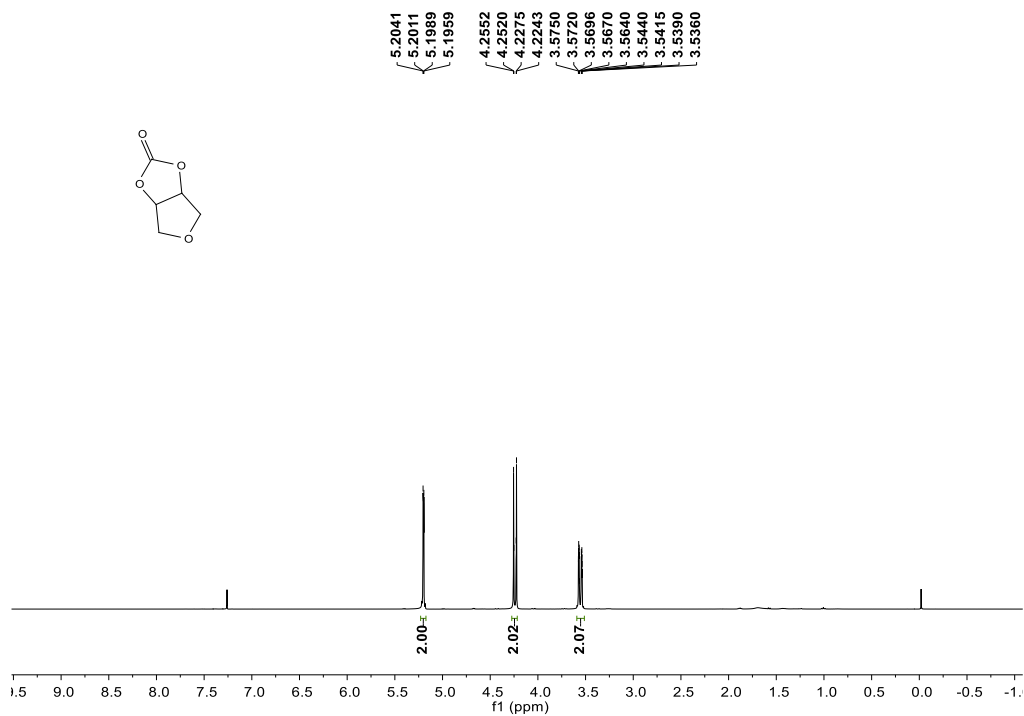

Figure S50. <sup>1</sup>H NMR spectrum of *cis*-4h in CDCl<sub>3</sub>

## 5. Computational details

The B3LYP<sup>19</sup> density functional method was employed to carry out all the geometry optimizations. For the geometry optimizations, the LANL2DZ basis set with the LANL2DZ pseudopotential<sup>20</sup> was utilized for La and I atoms. The 6-31G(d)<sup>21</sup> basis set was used for other atoms. Vibrational frequency analyses at the same level of the theory were performed on all the optimized geometries to characterize them as local minima (no imaginary frequency) or transition states (one imaginary frequency). In addition, intrinsic reaction coordinate (IRC)<sup>22</sup> calculations were used to verify that the transition state connect with appropriate reactant and product. The M06 functional<sup>23</sup> was employed to run single-point energy calculations based on the optimized structures with larger basis sets (SDD<sup>24</sup> for La, I atoms and 6-311++G(d,p) for other atoms). The Gibbs energy was determined by adding the single-point energy calculated at larger basis sets and the gas-phase thermal correction to the Gibbs energy obtained from the vibrational frequency analysis. All calculations were carried out with the Gaussian 09 (Revision C.01) suite of programs.<sup>25</sup> The 3D structures of the optimized intermediates or transition states were demonstrated using the software of CYLView.<sup>26</sup>

### Cartesian Coordinates and Energies

#### 1-H

| Center<br>Number | Atomic<br>Number | Atomic<br>Type | Coordinates (Angstroms) |           |           |
|------------------|------------------|----------------|-------------------------|-----------|-----------|
|                  |                  |                | X                       | Y         | Z         |
| 1                | 57               | 0              | -0.026164               | -0.397170 | 0.203534  |
| 2                | 8                | 0              | -0.608806               | 1.066980  | 1.900465  |
| 3                | 8                | 0              | 2.305926                | -0.348926 | 0.679035  |
| 4                | 8                | 0              | -1.973288               | -1.523931 | -0.554656 |
| 5                | 8                | 0              | 0.078921                | -2.419192 | 1.895712  |
| 6                | 7                | 0              | 1.249631                | 0.978387  | -1.882214 |
| 7                | 7                | 0              | -1.639836               | 1.591273  | -0.944743 |
| 8                | 7                | 0              | 0.998216                | -2.111435 | -2.004215 |
| 9                | 6                | 0              | -0.768143               | 2.513364  | -1.704418 |
| 10               | 1                | 0              | -0.261777               | 3.159334  | -0.983124 |
| 11               | 1                | 0              | -1.376253               | 3.177454  | -2.345396 |
| 12               | 6                | 0              | -1.566763               | 3.103893  | 1.102603  |
| 13               | 6                | 0              | -0.122661               | 4.497500  | 3.062949  |
| 14               | 1                | 0              | 0.438152                | 5.031368  | 3.827071  |
| 15               | 6                | 0              | 5.904484                | 0.128866  | 0.277941  |
| 16               | 1                | 0              | 6.832232                | -0.298490 | 0.652424  |
| 17               | 6                | 0              | -0.723795               | 2.387380  | 1.995680  |
| 18               | 6                | 0              | -5.996811               | -0.490053 | -0.841414 |

|    |   |   |           |           |           |
|----|---|---|-----------|-----------|-----------|
| 19 | 6 | 0 | -5.007440 | 0.358971  | -1.336568 |
| 20 | 1 | 0 | -5.292404 | 1.299360  | -1.806093 |
| 21 | 6 | 0 | 3.501010  | 1.220784  | -0.670056 |
| 22 | 6 | 0 | -0.012074 | 3.112700  | 2.975405  |
| 23 | 6 | 0 | 0.255338  | 1.814060  | -2.599996 |
| 24 | 1 | 0 | -0.260837 | 1.176446  | -3.322383 |
| 25 | 1 | 0 | 0.778006  | 2.588345  | -3.188507 |
| 26 | 6 | 0 | 3.457100  | 0.146352  | 0.266067  |
| 27 | 6 | 0 | -5.613831 | -1.700172 | -0.254399 |
| 28 | 1 | 0 | -6.370317 | -2.379126 | 0.133362  |
| 29 | 6 | 0 | -3.255243 | -1.194075 | -0.649289 |
| 30 | 6 | 0 | 4.688516  | -0.383015 | 0.719834  |
| 31 | 6 | 0 | -3.648699 | 0.032827  | -1.253401 |
| 32 | 6 | 0 | -1.658129 | 4.497002  | 1.210472  |
| 33 | 1 | 0 | -2.312255 | 5.033748  | 0.524517  |
| 34 | 6 | 0 | -0.946306 | 5.203837  | 2.180073  |
| 35 | 6 | 0 | -4.269803 | -2.048773 | -0.162720 |
| 36 | 6 | 0 | -2.609838 | 0.929767  | -1.880034 |
| 37 | 1 | 0 | -2.016997 | 0.340983  | -2.590100 |
| 38 | 1 | 0 | -3.121562 | 1.717392  | -2.459290 |
| 39 | 6 | 0 | -2.404848 | 2.350009  | 0.101933  |
| 40 | 1 | 0 | -3.027009 | 1.608907  | 0.612281  |
| 41 | 1 | 0 | -3.088024 | 3.053486  | -0.403383 |
| 42 | 6 | 0 | 4.738259  | 1.713277  | -1.103324 |
| 43 | 1 | 0 | 4.753951  | 2.536836  | -1.815893 |
| 44 | 6 | 0 | 2.226193  | 1.870355  | -1.150596 |
| 45 | 1 | 0 | 1.681520  | 2.298897  | -0.297995 |
| 46 | 1 | 0 | 2.489476  | 2.712946  | -1.809683 |
| 47 | 6 | 0 | 5.942409  | 1.183457  | -0.639894 |
| 48 | 6 | 0 | 1.926097  | 0.080419  | -2.851126 |
| 49 | 1 | 0 | 2.905750  | -0.173555 | -2.446270 |
| 50 | 1 | 0 | 2.111091  | 0.609492  | -3.800873 |
| 51 | 6 | 0 | 2.286856  | -2.736046 | -1.656084 |
| 52 | 1 | 0 | 3.017399  | -1.988979 | -1.346254 |
| 53 | 1 | 0 | 2.695626  | -3.314833 | -2.503333 |
| 54 | 1 | 0 | 2.135621  | -3.417037 | -0.813539 |
| 55 | 6 | 0 | 1.136385  | -1.195098 | -3.153877 |
| 56 | 1 | 0 | 0.123877  | -0.944036 | -3.491556 |
| 57 | 1 | 0 | 1.627920  | -1.709780 | -4.000788 |
| 58 | 6 | 0 | 0.026339  | -3.168288 | -2.339781 |
| 59 | 1 | 0 | -0.057924 | -3.861875 | -1.498535 |
| 60 | 1 | 0 | 0.339754  | -3.738410 | -3.231883 |
| 61 | 1 | 0 | -0.958621 | -2.728708 | -2.503695 |
| 62 | 6 | 0 | -0.936006 | -3.397699 | 2.210990  |
| 63 | 1 | 0 | -1.511324 | -3.562950 | 1.299432  |
| 64 | 1 | 0 | -1.598240 | -2.977926 | 2.979253  |
| 65 | 6 | 0 | 1.107451  | -2.562808 | 2.902048  |
| 66 | 1 | 0 | 0.761712  | -2.082528 | 3.827725  |
| 67 | 1 | 0 | 1.989521  | -2.041425 | 2.528343  |
| 68 | 6 | 0 | 1.252728  | -4.079659 | 3.066731  |
| 69 | 1 | 0 | 1.585535  | -4.349176 | 4.073240  |
| 70 | 1 | 0 | 1.990090  | -4.467512 | 2.356851  |
| 71 | 6 | 0 | -0.165008 | -4.627495 | 2.736245  |
| 72 | 1 | 0 | -0.113154 | -5.416853 | 1.980784  |
| 73 | 1 | 0 | -0.659305 | -5.048211 | 3.616760  |
| 74 | 1 | 0 | -7.045015 | -0.215477 | -0.915276 |
| 75 | 1 | 0 | -3.969661 | -2.992581 | 0.285624  |
| 76 | 1 | 0 | -1.034887 | 6.284342  | 2.248218  |
| 77 | 1 | 0 | 0.624097  | 2.555398  | 3.657544  |



|    |   |   |          |           |           |
|----|---|---|----------|-----------|-----------|
| 78 | 1 | 0 | 4.655061 | -1.199527 | 1.436693  |
| 79 | 1 | 0 | 6.889831 | 1.586068  | -0.985900 |

-----

|                                              |                             |
|----------------------------------------------|-----------------------------|
| Zero-point correction=                       | 0.670333 (Hartree/Particle) |
| Thermal correction to Energy=                | 0.708170                    |
| Thermal correction to Enthalpy=              | 0.709114                    |
| Thermal correction to Gibbs Free Energy=     | 0.596394                    |
| Sum of electronic and zero-point Energies=   | -1701.296522                |
| Sum of electronic and thermal Energies=      | -1701.258685                |
| Sum of electronic and thermal Enthalpies=    | -1701.257741                |
| Sum of electronic and thermal Free Energies= | -1701.370460                |

M06 /6-311++G(d,p)-SDD //B3LYP /6-31G(d)-LANL2DZ energy in dichloromethane solvent = -2105.6042

## b-H

-----

| Center<br>Number | Atomic<br>Number | Atomic<br>Type | Coordinates (Angstroms) |           |           |
|------------------|------------------|----------------|-------------------------|-----------|-----------|
|                  |                  |                | X                       | Y         | Z         |
| 1                | 57               | 0              | 0.307782                | -0.058774 | -0.727929 |
| 2                | 8                | 0              | 0.773098                | 2.195840  | -0.287039 |
| 3                | 8                | 0              | -1.297839               | -1.460803 | -1.656888 |
| 4                | 8                | 0              | 1.933145                | -1.464385 | 0.120607  |
| 5                | 8                | 0              | 1.861659                | 0.323323  | -2.817187 |
| 6                | 7                | 0              | -0.452236               | -0.605593 | 1.865447  |
| 7                | 7                | 0              | -2.151153               | 1.091395  | -0.046035 |
| 8                | 6                | 0              | 0.121554                | 0.306584  | 2.875121  |
| 9                | 1                | 0              | 1.207782                | 0.201166  | 2.883338  |
| 10               | 1                | 0              | -0.122214               | 1.343567  | 2.637051  |
| 11               | 1                | 0              | -0.257101               | 0.072484  | 3.884164  |
| 12               | 6                | 0              | -1.935630               | -0.544195 | 1.870637  |
| 13               | 1                | 0              | -2.305532               | -1.370386 | 1.258606  |
| 14               | 1                | 0              | -2.311087               | -0.708970 | 2.896445  |
| 15               | 6                | 0              | -2.520746               | 0.775801  | 1.356848  |
| 16               | 1                | 0              | -2.178901               | 1.601442  | 1.984765  |
| 17               | 6                | 0              | -2.064562               | 2.577139  | -0.270761 |
| 18               | 1                | 0              | -1.773171               | 2.698661  | -1.323158 |
| 19               | 6                | 0              | -0.746103               | 5.143898  | 2.225979  |
| 20               | 6                | 0              | 0.633994                | 4.945101  | 2.115056  |
| 21               | 1                | 0              | 1.319416                | 5.558832  | 2.695282  |
| 22               | 6                | 0              | 1.142920                | 3.965339  | 1.267403  |
| 23               | 6                | 0              | 0.284613                | 3.146725  | 0.501517  |
| 24               | 6                | 0              | -3.173441               | 0.587655  | -1.027698 |
| 25               | 1                | 0              | -4.099866               | 1.167602  | -0.883105 |
| 26               | 1                | 0              | -2.784892               | 0.852871  | -2.021125 |
| 27               | 6                | 0              | -3.517999               | -0.879002 | -1.004797 |
| 28               | 6                | 0              | -4.814925               | -1.302149 | -0.690510 |
| 29               | 6                | 0              | -5.178265               | -2.647916 | -0.752323 |
| 30               | 6                | 0              | -4.221830               | -3.589659 | -1.145519 |
| 31               | 1                | 0              | -4.489238               | -4.642330 | -1.204642 |
| 32               | 6                | 0              | -2.925179               | -3.194260 | -1.463857 |
| 33               | 6                | 0              | -2.544067               | -1.837835 | -1.394031 |
| 34               | 6                | 0              | -0.043917               | -2.026477 | 2.138918  |
| 35               | 1                | 0              | -0.571681               | -2.373892 | 3.042141  |
| 36               | 1                | 0              | -0.426969               | -2.620432 | 1.297501  |
| 37               | 6                | 0              | 1.435307                | -2.264190 | 2.322264  |
| 38               | 6                | 0              | 2.348477                | -1.994821 | 1.267133  |
| 39               | 6                | 0              | 3.711384                | -2.300174 | 1.464278  |
| 40               | 6                | 0              | 4.159822                | -2.847718 | 2.662548  |
| 41               | 1                | 0              | 5.216776                | -3.073390 | 2.785639  |

|    |   |   |           |           |           |
|----|---|---|-----------|-----------|-----------|
| 42 | 6 | 0 | 3.263661  | -3.106596 | 3.703920  |
| 43 | 6 | 0 | 1.913464  | -2.809582 | 3.519804  |
| 44 | 1 | 0 | 1.205057  | -3.012294 | 4.321491  |
| 45 | 6 | 0 | 2.491440  | 1.597037  | -3.129235 |
| 46 | 1 | 0 | 2.072025  | 1.972737  | -4.071961 |
| 47 | 1 | 0 | 2.244023  | 2.284258  | -2.317229 |
| 48 | 6 | 0 | 3.972845  | 1.263768  | -3.264874 |
| 49 | 1 | 0 | 4.516918  | 2.008976  | -3.852633 |
| 50 | 1 | 0 | 4.437209  | 1.199125  | -2.274243 |
| 51 | 6 | 0 | 3.928211  | -0.118830 | -3.938395 |
| 52 | 1 | 0 | 4.834736  | -0.707022 | -3.770351 |
| 53 | 1 | 0 | 3.792770  | -0.009314 | -5.020291 |
| 54 | 6 | 0 | 2.693920  | -0.775868 | -3.304050 |
| 55 | 1 | 0 | 2.103322  | -1.362912 | -4.013653 |
| 56 | 1 | 0 | 2.944710  | -1.398210 | -2.439182 |
| 57 | 1 | 0 | -5.555415 | -0.557231 | -0.402745 |
| 58 | 1 | 0 | 3.609549  | -3.532557 | 4.641220  |
| 59 | 1 | 0 | -6.190264 | -2.955499 | -0.505557 |
| 60 | 1 | 0 | -3.074539 | 3.007779  | -0.171416 |
| 61 | 6 | 0 | -1.117926 | 3.354426  | 0.606905  |
| 62 | 6 | 0 | -1.604080 | 4.347234  | 1.468044  |
| 63 | 1 | 0 | -2.680103 | 4.502073  | 1.533576  |
| 64 | 1 | 0 | -1.145404 | 5.908326  | 2.886083  |
| 65 | 1 | 0 | -3.615039 | 0.724794  | 1.466070  |
| 66 | 1 | 0 | 4.400840  | -2.096047 | 0.649313  |
| 67 | 1 | 0 | -2.175530 | -3.918837 | -1.769966 |
| 68 | 1 | 0 | 2.213791  | 3.803755  | 1.176715  |

-----  
Zero-point correction= 0.567071 (Hartree/Particle)  
Thermal correction to Energy= 0.600022  
Thermal correction to Enthalpy= 0.600966  
Thermal correction to Gibbs Free Energy= 0.499682  
Sum of electronic and zero-point Energies= -1528.123038  
Sum of electronic and thermal Energies= -1528.090087  
Sum of electronic and thermal Enthalpies= -1528.089143  
Sum of electronic and thermal Free Energies= -1528.190427

M06 /6-311++G(d,p)-SDD //B3LYP /6-31G(d)-LANL2DZ energy in dichloromethane solvent = -1932.3994

### 3d

-----

| Center<br>Number | Atomic<br>Number | Atomic<br>Type | Coordinates (Angstroms) |           |           |
|------------------|------------------|----------------|-------------------------|-----------|-----------|
|                  |                  |                | X                       | Y         | Z         |
| 1                | 6                | 0              | 0.343373                | 1.519852  | 0.033421  |
| 2                | 6                | 0              | -0.989507               | 0.835866  | 0.296572  |
| 3                | 6                | 0              | -1.096675               | -0.631958 | 0.413387  |
| 4                | 6                | 0              | 0.128700                | -1.513063 | 0.292223  |
| 5                | 6                | 0              | 1.280227                | -0.806974 | -0.440681 |
| 6                | 6                | 0              | 1.551181                | 0.573848  | 0.172127  |
| 7                | 1                | 0              | -1.921283               | -1.045059 | 0.999885  |
| 8                | 1                | 0              | -1.752049               | 1.445273  | 0.786098  |
| 9                | 1                | 0              | 0.305585                | 1.941032  | -0.979983 |
| 10               | 1                | 0              | 0.453405                | 2.368691  | 0.719996  |
| 11               | 1                | 0              | 0.447306                | -1.794491 | 1.306875  |
| 12               | 1                | 0              | -0.144285               | -2.444781 | -0.220929 |
| 13               | 1                | 0              | 2.182009                | -1.428863 | -0.390363 |
| 14               | 1                | 0              | 1.022795                | -0.698076 | -1.501185 |
| 15               | 1                | 0              | 1.789367                | 0.444937  | 1.237942  |
| 16               | 1                | 0              | 2.433395                | 1.033590  | -0.289496 |

17 8 0 -1.515005 0.039040 -0.783892

-----  
Zero-point correction= 0.152426 (Hartree/Particle)  
Thermal correction to Energy= 0.158385  
Thermal correction to Enthalpy= 0.159329  
Thermal correction to Gibbs Free Energy= 0.122871  
Sum of electronic and zero-point Energies= -309.698394  
Sum of electronic and thermal Energies= -309.692436  
Sum of electronic and thermal Enthalpies= -309.691492  
Sum of electronic and thermal Free Energies= -309.727950

M06 /6-311++G(d,p)-SDD //B3LYP /6-31G(d)-LANL2DZ energy in dichloromethane solvent = -309.71153

## THF

-----  
Center Atomic Atomic Coordinates (Angstroms)  
Number Number Type X Y Z  
-----  
1 8 0 0.000406 -1.251516 0.000995  
2 6 0 1.165723 -0.430269 0.131233  
3 1 0 1.537263 -0.483176 1.166476  
4 1 0 1.948365 -0.822553 -0.528878  
5 6 0 0.733296 0.997225 -0.226510  
6 1 0 1.343143 1.761698 0.264955  
7 1 0 0.796547 1.156848 -1.309685  
8 6 0 -0.734409 0.996269 0.227072  
9 1 0 -1.344967 1.760737 -0.263525  
10 1 0 -0.797930 1.154351 1.310459  
11 6 0 -1.165070 -0.431169 -0.132484  
12 1 0 -1.949151 -0.824551 0.525205  
13 1 0 -1.533761 -0.483561 -1.168828

-----  
Zero-point correction= 0.117359 (Hartree/Particle)  
Thermal correction to Energy= 0.122315  
Thermal correction to Enthalpy= 0.123259  
Thermal correction to Gibbs Free Energy= 0.088694  
Sum of electronic and zero-point Energies= -232.332091  
Sum of electronic and thermal Energies= -232.327135  
Sum of electronic and thermal Enthalpies= -232.326191  
Sum of electronic and thermal Free Energies= -232.360755

M06 /6-311++G(d,p)-SDD //B3LYP /6-31G(d)-LANL2DZ energy in dichloromethane solvent = -232.34797

## 1-H-3d

-----  
Center Atomic Atomic Coordinates (Angstroms)  
Number Number Type X Y Z  
-----  
1 57 0 0.065004 0.188085 -0.225696  
2 8 0 0.744989 -0.409808 1.943670  
3 8 0 -2.009108 1.069437 0.478186  
4 8 0 1.900786 -0.000191 -1.724315  
5 7 0 -1.971300 -1.291627 -1.449242  
6 7 0 0.657498 -2.556683 -0.350089  
7 7 0 -0.870357 1.315282 -2.782843  
8 6 0 -0.590637 -3.282068 -0.677308  
9 1 0 -1.178768 -3.361977 0.239876  
10 1 0 -0.360959 -4.315356 -0.993060  
11 6 0 0.347319 -2.759619 2.164985  
12 6 0 -1.118738 -2.248228 4.501204  
13 1 0 -1.685092 -2.042307 5.406796  
14 6 0 -5.548364 1.969800 0.447935

|    |   |   |           |           |           |
|----|---|---|-----------|-----------|-----------|
| 15 | 1 | 0 | -6.178433 | 2.824362  | 0.685284  |
| 16 | 6 | 0 | 0.200905  | -1.419016 | 2.620403  |
| 17 | 6 | 0 | 5.408762  | -2.122231 | -1.000797 |
| 18 | 6 | 0 | 4.177276  | -2.776434 | -1.043168 |
| 19 | 1 | 0 | 4.134724  | -3.853820 | -0.889642 |
| 20 | 6 | 0 | -3.910000 | -0.224517 | -0.152225 |
| 21 | 6 | 0 | -0.539807 | -1.193381 | 3.802120  |
| 22 | 6 | 0 | -1.422126 | -2.628270 | -1.784436 |
| 23 | 1 | 0 | -0.816475 | -2.522629 | -2.689020 |
| 24 | 1 | 0 | -2.248443 | -3.315071 | -2.040388 |
| 25 | 6 | 0 | -3.316938 | 0.978466  | 0.327876  |
| 26 | 6 | 0 | 5.447442  | -0.741224 | -1.219798 |
| 27 | 1 | 0 | 6.399957  | -0.215725 | -1.200487 |
| 28 | 6 | 0 | 3.021333  | -0.676562 | -1.500161 |
| 29 | 6 | 0 | -4.170740 | 2.067530  | 0.619543  |
| 30 | 6 | 0 | 2.986804  | -2.082813 | -1.288173 |
| 31 | 6 | 0 | -0.244013 | -3.803522 | 2.888204  |
| 32 | 1 | 0 | -0.110657 | -4.825599 | 2.535663  |
| 33 | 6 | 0 | -0.977696 | -3.565027 | 4.050229  |
| 34 | 6 | 0 | 4.277458  | -0.029244 | -1.469067 |
| 35 | 6 | 0 | 1.674972  | -2.812633 | -1.424760 |
| 36 | 1 | 0 | 1.212938  | -2.526479 | -2.375184 |
| 37 | 1 | 0 | 1.863564  | -3.898914 | -1.465390 |
| 38 | 6 | 0 | 1.207991  | -3.039471 | 0.960315  |
| 39 | 1 | 0 | 2.177627  | -2.546807 | 1.073840  |
| 40 | 1 | 0 | 1.395692  | -4.124040 | 0.884319  |
| 41 | 6 | 0 | -5.298148 | -0.295438 | -0.320280 |
| 42 | 1 | 0 | -5.736266 | -1.224151 | -0.683507 |
| 43 | 6 | 0 | -3.051354 | -1.438353 | -0.404824 |
| 44 | 1 | 0 | -2.546213 | -1.726866 | 0.526134  |
| 45 | 1 | 0 | -3.702199 | -2.281060 | -0.689891 |
| 46 | 6 | 0 | -6.126869 | 0.787305  | -0.025261 |
| 47 | 6 | 0 | -2.476475 | -0.641192 | -2.685948 |
| 48 | 1 | 0 | -3.281707 | 0.036532  | -2.401518 |
| 49 | 1 | 0 | -2.926172 | -1.392926 | -3.355474 |
| 50 | 6 | 0 | -1.893243 | 2.367247  | -2.645657 |
| 51 | 1 | 0 | -2.725488 | 2.036094  | -2.024848 |
| 52 | 1 | 0 | -2.279484 | 2.683758  | -3.630784 |
| 53 | 1 | 0 | -1.444347 | 3.236023  | -2.155667 |
| 54 | 6 | 0 | -1.403462 | 0.120206  | -3.470492 |
| 55 | 1 | 0 | -0.550421 | -0.534671 | -3.684275 |
| 56 | 1 | 0 | -1.836597 | 0.403046  | -4.448499 |
| 57 | 6 | 0 | 0.266250  | 1.850089  | -3.558003 |
| 58 | 1 | 0 | 0.650905  | 2.745061  | -3.059651 |
| 59 | 1 | 0 | -0.040057 | 2.126893  | -4.581965 |
| 60 | 1 | 0 | 1.069032  | 1.112079  | -3.588476 |
| 61 | 1 | 0 | 6.320975  | -2.679193 | -0.807682 |
| 62 | 1 | 0 | 4.301992  | 1.041550  | -1.656460 |
| 63 | 1 | 0 | -1.426154 | -4.389596 | 4.596858  |
| 64 | 1 | 0 | -0.646394 | -0.168790 | 4.148170  |
| 65 | 1 | 0 | -3.715786 | 2.982054  | 0.990886  |
| 66 | 1 | 0 | -7.201879 | 0.709255  | -0.158659 |
| 67 | 6 | 0 | 0.775195  | 4.434545  | 2.056284  |
| 68 | 6 | 0 | 1.008326  | 2.935747  | 2.002099  |
| 69 | 6 | 0 | 2.313472  | 2.370632  | 1.612933  |
| 70 | 6 | 0 | 3.476550  | 3.266425  | 1.260561  |
| 71 | 6 | 0 | 3.033834  | 4.691191  | 0.889455  |
| 72 | 6 | 0 | 2.073523  | 5.257362  | 1.945183  |
| 73 | 1 | 0 | 2.542302  | 1.363376  | 1.957766  |

|    |   |   |          |          |           |
|----|---|---|----------|----------|-----------|
| 74 | 1 | 0 | 0.351464 | 2.304895 | 2.597263  |
| 75 | 1 | 0 | 0.083304 | 4.695112 | 1.244674  |
| 76 | 1 | 0 | 0.256572 | 4.673858 | 2.992393  |
| 77 | 1 | 0 | 4.139454 | 3.296919 | 2.137615  |
| 78 | 1 | 0 | 4.052064 | 2.803591 | 0.449129  |
| 79 | 1 | 0 | 3.917162 | 5.333722 | 0.797057  |
| 80 | 1 | 0 | 2.544067 | 4.679566 | -0.092256 |
| 81 | 1 | 0 | 2.583017 | 5.259635 | 2.919362  |
| 82 | 1 | 0 | 1.826872 | 6.301796 | 1.721289  |
| 83 | 8 | 0 | 1.206507 | 2.390980 | 0.656772  |

-----  
 Zero-point correction= 0.705027 (Hartree/Particle)

Thermal correction to Energy= 0.743869

Thermal correction to Enthalpy= 0.744813

Thermal correction to Gibbs Free Energy= 0.631366

Sum of electronic and zero-point Energies= -1778.662636

Sum of electronic and thermal Energies= -1778.623793

Sum of electronic and thermal Enthalpies= -1778.622849

Sum of electronic and thermal Free Energies= -1778.736297

M06 /6-311++G(d,p)-SDD //B3LYP /6-31G(d)-LANL2DZ energy in dichloromethane solvent = -2182.9686

### b-H-3d

-----

| Center<br>Number | Atomic<br>Number | Atomic<br>Type | Coordinates (Angstroms) |           |           |
|------------------|------------------|----------------|-------------------------|-----------|-----------|
|                  |                  |                | X                       | Y         | Z         |
| 1                | 57               | 0              | 0.244345                | 0.076767  | -0.598943 |
| 2                | 8                | 0              | -1.342231               | 1.251674  | -1.827843 |
| 3                | 8                | 0              | 0.844036                | -2.027947 | 0.233167  |
| 4                | 8                | 0              | 1.684888                | 1.512049  | 0.489567  |
| 5                | 7                | 0              | -0.988249               | 0.732496  | 1.782638  |
| 6                | 7                | 0              | -2.164627               | -1.281817 | -0.204141 |
| 7                | 6                | 0              | -1.790045               | 1.970562  | 1.707927  |
| 8                | 1                | 0              | -1.137621               | 2.813189  | 1.472950  |
| 9                | 1                | 0              | -2.544197               | 1.890327  | 0.923089  |
| 10               | 1                | 0              | -2.292404               | 2.177572  | 2.667711  |
| 11               | 6                | 0              | -1.835753               | -0.427824 | 2.154145  |
| 12               | 1                | 0              | -1.172389               | -1.256455 | 2.411040  |
| 13               | 1                | 0              | -2.418646               | -0.187825 | 3.061480  |
| 14               | 6                | 0              | -2.817729               | -0.873245 | 1.064688  |
| 15               | 1                | 0              | -3.508598               | -0.059642 | 0.833565  |
| 16               | 6                | 0              | -3.046459               | -1.008545 | -1.394340 |
| 17               | 1                | 0              | -2.451843               | -1.298176 | -2.272587 |
| 18               | 6                | 0              | -5.445435               | 1.927372  | -1.812762 |
| 19               | 6                | 0              | -4.553678               | 2.969929  | -2.086543 |
| 20               | 1                | 0              | -4.932591               | 3.969059  | -2.289822 |
| 21               | 6                | 0              | -3.180678               | 2.742921  | -2.101341 |
| 22               | 6                | 0              | -2.652382               | 1.460016  | -1.839801 |
| 23               | 6                | 0              | -1.869567               | -2.754983 | -0.242642 |
| 24               | 1                | 0              | -2.829562               | -3.295298 | -0.287851 |
| 25               | 1                | 0              | -1.362729               | -2.930309 | -1.202517 |
| 26               | 6                | 0              | -1.043022               | -3.341133 | 0.872684  |
| 27               | 6                | 0              | -1.583473               | -4.309909 | 1.726329  |
| 28               | 6                | 0              | -0.812648               | -4.924995 | 2.713693  |
| 29               | 6                | 0              | 0.532158                | -4.564322 | 2.844197  |
| 30               | 1                | 0              | 1.148956                | -5.035246 | 3.606396  |
| 31               | 6                | 0              | 1.093517                | -3.603754 | 2.006632  |
| 32               | 6                | 0              | 0.321717                | -2.969545 | 1.010116  |

|    |   |   |           |           |           |
|----|---|---|-----------|-----------|-----------|
| 33 | 6 | 0 | 0.099750  | 0.863430  | 2.811178  |
| 34 | 1 | 0 | -0.361604 | 0.848984  | 3.812257  |
| 35 | 1 | 0 | 0.708083  | -0.047501 | 2.726769  |
| 36 | 6 | 0 | 0.968908  | 2.093108  | 2.700502  |
| 37 | 6 | 0 | 1.749724  | 2.329636  | 1.537171  |
| 38 | 6 | 0 | 2.594399  | 3.458811  | 1.512221  |
| 39 | 6 | 0 | 2.666058  | 4.327256  | 2.597322  |
| 40 | 1 | 0 | 3.326746  | 5.190085  | 2.549773  |
| 41 | 6 | 0 | 1.894539  | 4.099208  | 3.740661  |
| 42 | 6 | 0 | 1.054925  | 2.986151  | 3.775471  |
| 43 | 1 | 0 | 0.452078  | 2.796161  | 4.662091  |
| 44 | 1 | 0 | -2.628287 | -4.592275 | 1.605532  |
| 45 | 1 | 0 | 1.945611  | 4.775434  | 4.589069  |
| 46 | 1 | 0 | -1.251294 | -5.675066 | 3.365293  |
| 47 | 1 | 0 | -3.908246 | -1.695034 | -1.358172 |
| 48 | 6 | 0 | -3.558329 | 0.397582  | -1.571481 |
| 49 | 6 | 0 | -4.935934 | 0.653921  | -1.560660 |
| 50 | 1 | 0 | -5.620276 | -0.169232 | -1.360035 |
| 51 | 1 | 0 | -6.517228 | 2.102655  | -1.801057 |
| 52 | 1 | 0 | -3.422851 | -1.698270 | 1.471722  |
| 53 | 1 | 0 | 3.188385  | 3.629110  | 0.618314  |
| 54 | 1 | 0 | 2.136691  | -3.315033 | 2.104044  |
| 55 | 1 | 0 | -2.480789 | 3.546565  | -2.313447 |
| 56 | 6 | 0 | 3.761850  | -1.980040 | -1.817975 |
| 57 | 6 | 0 | 2.842731  | -1.525409 | -2.937220 |
| 58 | 6 | 0 | 2.929169  | -0.166360 | -3.509641 |
| 59 | 6 | 0 | 3.961025  | 0.820129  | -3.013501 |
| 60 | 6 | 0 | 4.526401  | 0.455409  | -1.629700 |
| 61 | 6 | 0 | 4.944332  | -1.020980 | -1.577850 |
| 62 | 1 | 0 | 2.560122  | -0.009846 | -4.523268 |
| 63 | 1 | 0 | 2.392495  | -2.305380 | -3.549494 |
| 64 | 1 | 0 | 3.151846  | -2.094713 | -0.912595 |
| 65 | 1 | 0 | 4.134823  | -2.981058 | -2.066585 |
| 66 | 1 | 0 | 4.769862  | 0.833411  | -3.758861 |
| 67 | 1 | 0 | 3.524883  | 1.827446  | -3.007914 |
| 68 | 1 | 0 | 5.390870  | 1.096606  | -1.421958 |
| 69 | 1 | 0 | 3.785220  | 0.674409  | -0.851523 |
| 70 | 1 | 0 | 5.714203  | -1.198743 | -2.342763 |
| 71 | 1 | 0 | 5.406011  | -1.251630 | -0.611296 |
| 72 | 8 | 0 | 1.857093  | -0.499668 | -2.586890 |

-----  
Zero-point correction= 0.601723 (Hartree/Particle)

Thermal correction to Energy= 0.635861

Thermal correction to Enthalpy= 0.636805

Thermal correction to Gibbs Free Energy= 0.533771

Sum of electronic and zero-point Energies= -1605.486797

Sum of electronic and thermal Energies= -1605.452659

Sum of electronic and thermal Enthalpies= -1605.451715

Sum of electronic and thermal Free Energies= -1605.554749

M06 /6-311++G(d,p)-SDD //B3LYP /6-31G(d)-LANL2DZ energy in dichloromethane solvent = -2009.7625

## I

-----

| Center Number | Atomic Number | Atomic Type | Coordinates (Angstroms) |          |          |
|---------------|---------------|-------------|-------------------------|----------|----------|
|               |               |             | X                       | Y        | Z        |
| 1             | 53            | 0           | 0.000000                | 0.000000 | 0.000000 |

-----

Zero-point correction= 0.000000 (Hartree/Particle)

Thermal correction to Energy= 0.001416  
 Thermal correction to Enthalpy= 0.002360  
 Thermal correction to Gibbs Free Energy= -0.016848  
 Sum of electronic and zero-point Energies= -11.472110  
 Sum of electronic and thermal Energies= -11.470694  
 Sum of electronic and thermal Enthalpies= -11.469750  
 Sum of electronic and thermal Free Energies= -11.488958  
 M06 /6-311++G(d,p)-SDD //B3LYP /6-31G(d)-LANL2DZ energy in dichloromethane solvent = -11.484534

## 1-int1

| Center<br>Number | Atomic<br>Number | Atomic<br>Type | Coordinates (Angstroms) |           |           |
|------------------|------------------|----------------|-------------------------|-----------|-----------|
|                  |                  |                | X                       | Y         | Z         |
| 1                | 57               | 0              | 0.716269                | 0.066212  | -0.237212 |
| 2                | 8                | 0              | 0.658482                | 0.917160  | 1.928245  |
| 3                | 8                | 0              | 1.051338                | -2.161483 | 0.505345  |
| 4                | 8                | 0              | 0.340619                | 1.754000  | -1.880628 |
| 5                | 7                | 0              | 3.368140                | -0.824136 | -0.918599 |
| 6                | 7                | 0              | 2.795385                | 2.096831  | 0.027445  |
| 7                | 7                | 0              | 0.965222                | -1.302057 | -2.848024 |
| 8                | 6                | 0              | 4.107412                | 1.422228  | 0.010407  |
| 9                | 1                | 0              | 4.268932                | 0.979367  | 0.995855  |
| 10               | 1                | 0              | 4.919211                | 2.159717  | -0.136666 |
| 11               | 6                | 0              | 2.661377                | 2.043739  | 2.566940  |
| 12               | 6                | 0              | 2.635948                | 0.626273  | 4.986488  |
| 13               | 1                | 0              | 2.617830                | 0.075152  | 5.924715  |
| 14               | 6                | 0              | 2.235588                | -5.602800 | 0.770572  |
| 15               | 1                | 0              | 1.828601                | -6.600955 | 0.921072  |
| 16               | 6                | 0              | 1.612236                | 1.116975  | 2.824673  |
| 17               | 6                | 0              | 0.156527                | 5.877074  | -1.345626 |
| 18               | 6                | 0              | 1.343500                | 5.180594  | -1.116004 |
| 19               | 1                | 0              | 2.233984                | 5.721272  | -0.796639 |
| 20               | 6                | 0              | 3.266334                | -3.024420 | 0.391772  |
| 21               | 6                | 0              | 1.622358                | 0.421462  | 4.055355  |
| 22               | 6                | 0              | 4.246717                | 0.356466  | -1.078300 |
| 23               | 1                | 0              | 4.038925                | 0.798656  | -2.056496 |
| 24               | 1                | 0              | 5.303237                | 0.030536  | -1.101920 |
| 25               | 6                | 0              | 1.859591                | -3.195567 | 0.549660  |
| 26               | 6                | 0              | -0.973464               | 5.164892  | -1.762927 |
| 27               | 1                | 0              | -1.909394               | 5.689466  | -1.943761 |
| 28               | 6                | 0              | 0.276599                | 3.067084  | -1.712396 |
| 29               | 6                | 0              | 1.372268                | -4.512337 | 0.737945  |
| 30               | 6                | 0              | 1.422969                | 3.794885  | -1.289334 |
| 31               | 6                | 0              | 3.669016                | 2.230079  | 3.520723  |
| 32               | 1                | 0              | 4.460123                | 2.950035  | 3.311845  |
| 33               | 6                | 0              | 3.671669                | 1.531650  | 4.728943  |
| 34               | 6                | 0              | -0.917377               | 3.786787  | -1.948339 |
| 35               | 6                | 0              | 2.724114                | 3.056440  | -1.120388 |
| 36               | 1                | 0              | 2.914287                | 2.478902  | -2.030864 |
| 37               | 1                | 0              | 3.548019                | 3.785090  | -1.013735 |
| 38               | 6                | 0              | 2.623482                | 2.863599  | 1.303495  |
| 39               | 1                | 0              | 1.658493                | 3.371540  | 1.217598  |
| 40               | 1                | 0              | 3.402235                | 3.645780  | 1.353237  |
| 41               | 6                | 0              | 4.112063                | -4.138836 | 0.423998  |
| 42               | 1                | 0              | 5.184596                | -3.986810 | 0.305248  |
| 43               | 6                | 0              | 3.836176                | -1.634841 | 0.263126  |
| 44               | 1                | 0              | 3.583176                | -1.053971 | 1.158990  |
| 45               | 1                | 0              | 4.936691                | -1.705683 | 0.226652  |

|    |    |   |           |           |           |
|----|----|---|-----------|-----------|-----------|
| 46 | 6  | 0 | 3.615446  | -5.429369 | 0.612642  |
| 47 | 6  | 0 | 3.380064  | -1.613151 | -2.173919 |
| 48 | 1  | 0 | 3.169185  | -2.651975 | -1.919090 |
| 49 | 1  | 0 | 4.388054  | -1.603712 | -2.623973 |
| 50 | 6  | 0 | 0.593588  | -2.725765 | -2.791086 |
| 51 | 1  | 0 | 1.160604  | -3.254743 | -2.025193 |
| 52 | 1  | 0 | 0.751535  | -3.221439 | -3.766468 |
| 53 | 1  | 0 | -0.464404 | -2.804937 | -2.528149 |
| 54 | 6  | 0 | 2.379664  | -1.119356 | -3.222679 |
| 55 | 1  | 0 | 2.526022  | -0.049914 | -3.414612 |
| 56 | 1  | 0 | 2.596781  | -1.643928 | -4.173644 |
| 57 | 6  | 0 | 0.108568  | -0.619389 | -3.835608 |
| 58 | 1  | 0 | -0.940008 | -0.771744 | -3.566086 |
| 59 | 1  | 0 | 0.270392  | -1.019458 | -4.852980 |
| 60 | 1  | 0 | 0.307692  | 0.453170  | -3.812441 |
| 61 | 1  | 0 | 0.111952  | 6.952894  | -1.199872 |
| 62 | 1  | 0 | -1.792311 | 3.230627  | -2.274715 |
| 63 | 1  | 0 | 4.461963  | 1.693595  | 5.457150  |
| 64 | 1  | 0 | 0.812964  | -0.276850 | 4.248889  |
| 65 | 1  | 0 | 0.300696  | -4.640216 | 0.865706  |
| 66 | 1  | 0 | 4.289944  | -6.280817 | 0.639077  |
| 67 | 6  | 0 | -3.252549 | -2.318378 | 0.426389  |
| 68 | 6  | 0 | -2.864926 | -0.859604 | 0.556350  |
| 69 | 6  | 0 | -3.146851 | 0.114729  | -0.498853 |
| 70 | 6  | 0 | -3.871860 | -0.292956 | -1.755369 |
| 71 | 6  | 0 | -3.788350 | -1.804415 | -2.023572 |
| 72 | 6  | 0 | -4.180606 | -2.599816 | -0.770327 |
| 73 | 1  | 0 | -3.226997 | 1.160116  | -0.210602 |
| 74 | 1  | 0 | -2.723916 | -0.476050 | 1.563345  |
| 75 | 1  | 0 | -2.325984 | -2.906632 | 0.365902  |
| 76 | 1  | 0 | -3.761221 | -2.606610 | 1.352373  |
| 77 | 1  | 0 | -4.918351 | -0.003142 | -1.592678 |
| 78 | 1  | 0 | -3.486901 | 0.287031  | -2.605972 |
| 79 | 1  | 0 | -4.459496 | -2.057715 | -2.853889 |
| 80 | 1  | 0 | -2.771710 | -2.074883 | -2.344934 |
| 81 | 1  | 0 | -5.197968 | -2.310179 | -0.480277 |
| 82 | 1  | 0 | -4.184710 | -3.676607 | -0.984940 |
| 83 | 8  | 0 | -1.775512 | -0.410940 | -0.353025 |
| 84 | 53 | 0 | -6.604424 | 0.016488  | 1.184722  |

-----  
Zero-point correction= 0.704533 (Hartree/Particle)

Thermal correction to Energy= 0.746108

Thermal correction to Enthalpy= 0.747052

Thermal correction to Gibbs Free Energy= 0.622772

Sum of electronic and zero-point Energies= -1790.155762

Sum of electronic and thermal Energies= -1790.114187

Sum of electronic and thermal Enthalpies= -1790.113243

Sum of electronic and thermal Free Energies= -1790.237522

M06 /6-311++G(d,p)-SDD //B3LYP /6-31G(d)-LANL2DZ energy in dichloromethane solvent = -2194.4789

## b-int1

-----

| Center<br>Number | Atomic<br>Number | Atomic<br>Type | Coordinates (Angstroms) |           |           |
|------------------|------------------|----------------|-------------------------|-----------|-----------|
|                  |                  |                | X                       | Y         | Z         |
| 1                | 57               | 0              | 0.640817                | 0.377372  | -0.106598 |
| 2                | 8                | 0              | 0.685752                | 0.243131  | 2.229125  |
| 3                | 8                | 0              | 0.690415                | -0.789377 | -2.136718 |
| 4                | 8                | 0              | 1.608605                | 2.400254  | -0.685044 |



|    |   |   |           |           |           |
|----|---|---|-----------|-----------|-----------|
| 5  | 7 | 0 | 3.422265  | -0.006383 | -0.027945 |
| 6  | 7 | 0 | 1.399009  | -2.245428 | 0.512361  |
| 7  | 6 | 0 | 4.065156  | 0.365380  | 1.244974  |
| 8  | 1 | 0 | 3.903992  | 1.427030  | 1.438721  |
| 9  | 1 | 0 | 3.632829  | -0.201071 | 2.070889  |
| 10 | 1 | 0 | 5.153151  | 0.178321  | 1.212105  |
| 11 | 6 | 0 | 3.642974  | -1.437952 | -0.336132 |
| 12 | 1 | 0 | 3.362001  | -1.602063 | -1.377767 |
| 13 | 1 | 0 | 4.719433  | -1.678762 | -0.251056 |
| 14 | 6 | 0 | 2.871534  | -2.411822 | 0.563578  |
| 15 | 1 | 0 | 3.183000  | -2.279611 | 1.601899  |
| 16 | 6 | 0 | 0.749363  | -2.592849 | 1.824336  |
| 17 | 1 | 0 | -0.316440 | -2.353848 | 1.699472  |
| 18 | 6 | 0 | 2.243958  | -2.087175 | 5.298261  |
| 19 | 6 | 0 | 2.123754  | -0.700967 | 5.446482  |
| 20 | 1 | 0 | 2.444620  | -0.223930 | 6.370504  |
| 21 | 6 | 0 | 1.596174  | 0.078924  | 4.422281  |
| 22 | 6 | 0 | 1.167469  | -0.502324 | 3.206216  |
| 23 | 6 | 0 | 0.756578  | -3.132674 | -0.515502 |
| 24 | 1 | 0 | 0.816534  | -4.173841 | -0.156320 |
| 25 | 1 | 0 | -0.309447 | -2.862726 | -0.519386 |
| 26 | 6 | 0 | 1.292347  | -3.085273 | -1.923403 |
| 27 | 6 | 0 | 1.838731  | -4.229678 | -2.514543 |
| 28 | 6 | 0 | 2.263022  | -4.234951 | -3.844393 |
| 29 | 6 | 0 | 2.130347  | -3.064907 | -4.599543 |
| 30 | 1 | 0 | 2.450058  | -3.051264 | -5.639702 |
| 31 | 6 | 0 | 1.591740  | -1.912115 | -4.034946 |
| 32 | 6 | 0 | 1.166671  | -1.891360 | -2.687395 |
| 33 | 6 | 0 | 3.973527  | 0.808306  | -1.160120 |
| 34 | 1 | 0 | 5.005561  | 0.474853  | -1.365075 |
| 35 | 1 | 0 | 3.371217  | 0.549425  | -2.041067 |
| 36 | 6 | 0 | 3.987607  | 2.304228  | -0.950780 |
| 37 | 6 | 0 | 2.774188  | 3.022686  | -0.753920 |
| 38 | 6 | 0 | 2.843746  | 4.428786  | -0.630418 |
| 39 | 6 | 0 | 4.060737  | 5.099650  | -0.693095 |
| 40 | 1 | 0 | 4.079823  | 6.183357  | -0.594398 |
| 41 | 6 | 0 | 5.253375  | 4.393286  | -0.879627 |
| 42 | 6 | 0 | 5.198256  | 3.004726  | -1.003701 |
| 43 | 1 | 0 | 6.119165  | 2.442355  | -1.153473 |
| 44 | 1 | 0 | 1.922063  | -5.138198 | -1.919267 |
| 45 | 1 | 0 | 6.206583  | 4.912851  | -0.927481 |
| 46 | 1 | 0 | 2.681595  | -5.135816 | -4.284628 |
| 47 | 1 | 0 | 0.809617  | -3.684323 | 1.970737  |
| 48 | 6 | 0 | 1.282432  | -1.913858 | 3.059883  |
| 49 | 6 | 0 | 1.819771  | -2.674490 | 4.106042  |
| 50 | 1 | 0 | 1.895511  | -3.754096 | 3.981464  |
| 51 | 1 | 0 | 2.654209  | -2.698375 | 6.097407  |
| 52 | 1 | 0 | 3.156102  | -3.435530 | 0.273221  |
| 53 | 1 | 0 | 1.911535  | 4.968176  | -0.485920 |
| 54 | 1 | 0 | 1.484950  | -0.998663 | -4.613789 |
| 55 | 1 | 0 | 1.497298  | 1.155784  | 4.529081  |
| 56 | 6 | 0 | -3.564952 | 1.550877  | -1.792422 |
| 57 | 6 | 0 | -3.195839 | 0.467058  | -0.799988 |
| 58 | 6 | 0 | -3.132829 | 0.724429  | 0.636660  |
| 59 | 6 | 0 | -3.468426 | 2.081389  | 1.199493  |
| 60 | 6 | 0 | -3.365336 | 3.200510  | 0.150433  |
| 61 | 6 | 0 | -4.131479 | 2.816696  | -1.123478 |
| 62 | 1 | 0 | -3.272129 | -0.123045 | 1.303068  |
| 63 | 1 | 0 | -3.352888 | -0.560501 | -1.112996 |

|    |    |   |           |           |           |
|----|----|---|-----------|-----------|-----------|
| 64 | 1  | 0 | -2.673566 | 1.783951  | -2.392622 |
| 65 | 1  | 0 | -4.315081 | 1.130467  | -2.469578 |
| 66 | 1  | 0 | -4.503091 | 1.998733  | 1.556893  |
| 67 | 1  | 0 | -2.829773 | 2.287258  | 2.069303  |
| 68 | 1  | 0 | -3.775930 | 4.125793  | 0.573515  |
| 69 | 1  | 0 | -2.310437 | 3.402304  | -0.083660 |
| 70 | 1  | 0 | -5.176978 | 2.615303  | -0.859685 |
| 71 | 1  | 0 | -4.121947 | 3.645996  | -1.842297 |
| 72 | 8  | 0 | -1.870718 | 0.638346  | -0.131423 |
| 73 | 53 | 0 | -6.673558 | -0.299243 | 0.006192  |

-----  
 Zero-point correction= 0.601048 (Hartree/Particle)

Thermal correction to Energy= 0.637948

Thermal correction to Enthalpy= 0.638892

Thermal correction to Gibbs Free Energy= 0.524176

Sum of electronic and zero-point Energies= -1616.987969

Sum of electronic and thermal Energies= -1616.951069

Sum of electronic and thermal Enthalpies= -1616.950125

Sum of electronic and thermal Free Energies= -1617.064841

M06 /6-311++G(d,p)-SDD //B3LYP /6-31G(d)-LANL2DZ energy in dichloromethane solvent = -2021.2778

## 1-ts1

-----

| Center<br>Number | Atomic<br>Number | Atomic<br>Type | Coordinates (Angstroms) |           |           |
|------------------|------------------|----------------|-------------------------|-----------|-----------|
|                  |                  |                | X                       | Y         | Z         |
| 1                | 57               | 0              | 0.600563                | 0.114012  | -0.347251 |
| 2                | 8                | 0              | 0.348502                | 0.897027  | 1.842650  |
| 3                | 8                | 0              | 0.662934                | -2.162341 | 0.361219  |
| 4                | 8                | 0              | 0.792262                | 1.838090  | -2.015554 |
| 5                | 7                | 0              | 3.275551                | -0.996757 | -0.677373 |
| 6                | 7                | 0              | 2.845900                | 1.939616  | 0.334258  |
| 7                | 7                | 0              | 1.127512                | -1.240184 | -2.934920 |
| 8                | 6                | 0              | 4.072671                | 1.132976  | 0.462482  |
| 9                | 1                | 0              | 4.047285                | 0.635292  | 1.434457  |
| 10               | 1                | 0              | 4.967056                | 1.785685  | 0.470785  |
| 11               | 6                | 0              | 2.334846                | 1.784574  | 2.819722  |
| 12               | 6                | 0              | 1.829374                | 0.265103  | 5.121481  |
| 13               | 1                | 0              | 1.624946                | -0.325269 | 6.012782  |
| 14               | 6                | 0              | 1.501513                | -5.703632 | 0.623113  |
| 15               | 1                | 0              | 0.992210                | -6.664437 | 0.673401  |
| 16               | 6                | 0              | 1.177462                | 0.956202  | 2.870094  |
| 17               | 6                | 0              | 0.699439                | 5.931090  | -1.263019 |
| 18               | 6                | 0              | 1.787236                | 5.155155  | -0.859516 |
| 19               | 1                | 0              | 2.625307                | 5.625186  | -0.345455 |
| 20               | 6                | 0              | 2.793718                | -3.219207 | 0.501161  |
| 21               | 6                | 0              | 0.946874                | 0.206192  | 4.047423  |
| 22               | 6                | 0              | 4.262729                | 0.104342  | -0.654549 |
| 23               | 1                | 0              | 4.226483                | 0.604562  | -1.626190 |
| 24               | 1                | 0              | 5.281937                | -0.315790 | -0.557777 |
| 25               | 6                | 0              | 1.367978                | -3.263354 | 0.463882  |
| 26               | 6                | 0              | -0.361600               | 5.308318  | -1.929752 |
| 27               | 1                | 0              | -1.220157               | 5.895750  | -2.249732 |
| 28               | 6                | 0              | 0.756503                | 3.139706  | -1.779150 |
| 29               | 6                | 0              | 0.749129                | -4.537595 | 0.526905  |
| 30               | 6                | 0              | 1.833247                | 3.779191  | -1.102783 |
| 31               | 6                | 0              | 3.206194                | 1.824925  | 3.914406  |
| 32               | 1                | 0              | 4.082383                | 2.471201  | 3.861192  |
| 33               | 6                | 0              | 2.970310                | 1.074124  | 5.067120  |

|    |    |   |           |           |           |
|----|----|---|-----------|-----------|-----------|
| 34 | 6  | 0 | -0.335926 | 3.940963  | -2.188324 |
| 35 | 6  | 0 | 3.040077  | 2.953264  | -0.747257 |
| 36 | 1  | 0 | 3.355676  | 2.408875  | -1.642614 |
| 37 | 1  | 0 | 3.872361  | 3.620069  | -0.455321 |
| 38 | 6  | 0 | 2.557935  | 2.659937  | 1.614205  |
| 39 | 1  | 0 | 1.665280  | 3.262790  | 1.421798  |
| 40 | 1  | 0 | 3.388106  | 3.359868  | 1.822195  |
| 41 | 6  | 0 | 3.526391  | -4.407725 | 0.593696  |
| 42 | 1  | 0 | 4.614312  | -4.350560 | 0.624975  |
| 43 | 6  | 0 | 3.496579  | -1.885835 | 0.516731  |
| 44 | 1  | 0 | 3.168885  | -1.315351 | 1.394497  |
| 45 | 1  | 0 | 4.580689  | -2.059498 | 0.632408  |
| 46 | 6  | 0 | 2.899880  | -5.653431 | 0.655980  |
| 47 | 6  | 0 | 3.403078  | -1.734040 | -1.956162 |
| 48 | 1  | 0 | 3.091320  | -2.764432 | -1.783329 |
| 49 | 1  | 0 | 4.460757  | -1.780339 | -2.270230 |
| 50 | 6  | 0 | 0.675393  | -2.638858 | -2.986437 |
| 51 | 1  | 0 | 1.095843  | -3.224819 | -2.169462 |
| 52 | 1  | 0 | 0.943568  | -3.113857 | -3.948630 |
| 53 | 1  | 0 | -0.412017 | -2.662704 | -2.878598 |
| 54 | 6  | 0 | 2.587780  | -1.126532 | -3.101950 |
| 55 | 1  | 0 | 2.814943  | -0.059274 | -3.205834 |
| 56 | 1  | 0 | 2.906583  | -1.615651 | -4.043735 |
| 57 | 6  | 0 | 0.452754  | -0.475877 | -3.999363 |
| 58 | 1  | 0 | -0.629641 | -0.569274 | -3.872827 |
| 59 | 1  | 0 | 0.723370  | -0.855875 | -5.001883 |
| 60 | 1  | 0 | 0.712548  | 0.579994  | -3.908365 |
| 61 | 1  | 0 | 0.677845  | 6.998412  | -1.059835 |
| 62 | 1  | 0 | -1.157558 | 3.454205  | -2.707574 |
| 63 | 1  | 0 | 3.658610  | 1.122122  | 5.906957  |
| 64 | 1  | 0 | 0.057167  | -0.416240 | 4.083924  |
| 65 | 1  | 0 | -0.336950 | -4.571292 | 0.506423  |
| 66 | 1  | 0 | 3.488530  | -6.563685 | 0.732133  |
| 67 | 6  | 0 | -3.311902 | -1.933875 | 0.346017  |
| 68 | 6  | 0 | -3.171959 | -0.436914 | 0.286341  |
| 69 | 6  | 0 | -3.145341 | 0.282311  | -0.988331 |
| 70 | 6  | 0 | -3.810427 | -0.372742 | -2.188186 |
| 71 | 6  | 0 | -3.653247 | -1.901782 | -2.183301 |
| 72 | 6  | 0 | -4.103244 | -2.503886 | -0.843300 |
| 73 | 1  | 0 | -3.331851 | 1.357701  | -0.929528 |
| 74 | 1  | 0 | -2.949338 | 0.120849  | 1.184857  |
| 75 | 1  | 0 | -2.300343 | -2.362141 | 0.384402  |
| 76 | 1  | 0 | -3.804723 | -2.186795 | 1.288810  |
| 77 | 1  | 0 | -4.873740 | -0.105073 | -2.148365 |
| 78 | 1  | 0 | -3.392253 | 0.061743  | -3.106786 |
| 79 | 1  | 0 | -4.240011 | -2.332255 | -3.005458 |
| 80 | 1  | 0 | -2.602811 | -2.161589 | -2.371581 |
| 81 | 1  | 0 | -5.164318 | -2.277069 | -0.684906 |
| 82 | 1  | 0 | -3.996363 | -3.596469 | -0.861423 |
| 83 | 8  | 0 | -1.777249 | -0.063910 | -0.793401 |
| 84 | 53 | 0 | -6.039830 | 0.267520  | 1.170252  |

-----  
Zero-point correction= 0.703185 (Hartree/Particle)  
Thermal correction to Energy= 0.744192  
Thermal correction to Enthalpy= 0.745137  
Thermal correction to Gibbs Free Energy= 0.624324  
Sum of electronic and zero-point Energies= -1790.149446  
Sum of electronic and thermal Energies= -1790.108439  
Sum of electronic and thermal Enthalpies= -1790.107495

Sum of electronic and thermal Free Energies= -1790.228308

M06 /6-311++G(d,p)-SDD //B3LYP /6-31G(d)-LANL2DZ energy in dichloromethane solvent = -2194.4701

## b-ts1

| Center<br>Number | Atomic<br>Number | Atomic<br>Type | Coordinates (Angstroms) |           |           |
|------------------|------------------|----------------|-------------------------|-----------|-----------|
|                  |                  |                | X                       | Y         | Z         |
| 1                | 57               | 0              | 0.583161                | 0.417869  | 0.032372  |
| 2                | 8                | 0              | 0.919703                | -0.045367 | 2.314058  |
| 3                | 8                | 0              | 0.403377                | -0.458243 | -2.145270 |
| 4                | 8                | 0              | 1.591934                | 2.476223  | -0.373630 |
| 5                | 7                | 0              | 3.365883                | -0.060176 | -0.241188 |
| 6                | 7                | 0              | 1.302315                | -2.291409 | 0.200160  |
| 7                | 6                | 0              | 4.159273                | 0.107807  | 0.987779  |
| 8                | 1                | 0              | 4.067147                | 1.134903  | 1.344438  |
| 9                | 1                | 0              | 3.794856                | -0.557888 | 1.771348  |
| 10               | 1                | 0              | 5.228614                | -0.103587 | 0.806174  |
| 11               | 6                | 0              | 3.483801                | -1.439122 | -0.764496 |
| 12               | 1                | 0              | 3.090429                | -1.445433 | -1.782298 |
| 13               | 1                | 0              | 4.550566                | -1.727077 | -0.830928 |
| 14               | 6                | 0              | 2.763487                | -2.505254 | 0.071495  |
| 15               | 1                | 0              | 3.183610                | -2.527530 | 1.079235  |
| 16               | 6                | 0              | 0.772972                | -2.796128 | 1.514160  |
| 17               | 1                | 0              | -0.285044               | -2.498058 | 1.541311  |
| 18               | 6                | 0              | 2.642836                | -2.861485 | 4.839745  |
| 19               | 6                | 0              | 2.623772                | -1.506388 | 5.188920  |
| 20               | 1                | 0              | 3.067449                | -1.181678 | 6.128363  |
| 21               | 6                | 0              | 2.042380                | -0.564466 | 4.346544  |
| 22               | 6                | 0              | 1.454197                | -0.943000 | 3.115447  |
| 23               | 6                | 0              | 0.520988                | -3.004715 | -0.864722 |
| 24               | 1                | 0              | 0.566497                | -4.087701 | -0.658315 |
| 25               | 1                | 0              | -0.526280               | -2.701266 | -0.721397 |
| 26               | 6                | 0              | 0.917891                | -2.780164 | -2.301391 |
| 27               | 6                | 0              | 1.350420                | -3.849384 | -3.093129 |
| 28               | 6                | 0              | 1.643789                | -3.686631 | -4.448288 |
| 29               | 6                | 0              | 1.493951                | -2.419564 | -5.022204 |
| 30               | 1                | 0              | 1.712622                | -2.273131 | -6.078379 |
| 31               | 6                | 0              | 1.066920                | -1.338398 | -4.256732 |
| 32               | 6                | 0              | 0.774121                | -1.487105 | -2.880919 |
| 33               | 6                | 0              | 3.825063                | 0.888855  | -1.305754 |
| 34               | 1                | 0              | 4.813551                | 0.559794  | -1.671941 |
| 35               | 1                | 0              | 3.119213                | 0.774389  | -2.139061 |
| 36               | 6                | 0              | 3.927099                | 2.339617  | -0.896749 |
| 37               | 6                | 0              | 2.771726                | 3.060812  | -0.477195 |
| 38               | 6                | 0              | 2.920889                | 4.433590  | -0.170451 |
| 39               | 6                | 0              | 4.155147                | 5.067426  | -0.267585 |
| 40               | 1                | 0              | 4.233998                | 6.125400  | -0.023687 |
| 41               | 6                | 0              | 5.289620                | 4.356983  | -0.673429 |
| 42               | 6                | 0              | 5.157106                | 3.002176  | -0.980062 |
| 43               | 1                | 0              | 6.031451                | 2.437013  | -1.301294 |
| 44               | 1                | 0              | 1.448794                | -4.833297 | -2.635647 |
| 45               | 1                | 0              | 6.256610                | 4.847141  | -0.749514 |
| 46               | 1                | 0              | 1.975570                | -4.531854 | -5.045208 |
| 47               | 1                | 0              | 0.786565                | -3.899279 | 1.501652  |
| 48               | 6                | 0              | 1.468257                | -2.324559 | 2.765831  |
| 49               | 6                | 0              | 2.062887                | -3.250667 | 3.631867  |
| 50               | 1                | 0              | 2.060117                | -4.303553 | 3.351482  |
| 51               | 1                | 0              | 3.095485                | -3.599349 | 5.496576  |

|    |    |   |           |           |           |
|----|----|---|-----------|-----------|-----------|
| 52 | 1  | 0 | 2.973160  | -3.486826 | -0.382787 |
| 53 | 1  | 0 | 2.033555  | 4.976975  | 0.143384  |
| 54 | 1  | 0 | 0.948390  | -0.350821 | -4.694585 |
| 55 | 1  | 0 | 2.021679  | 0.489484  | 4.610741  |
| 56 | 6  | 0 | -3.707738 | 1.639015  | -1.365751 |
| 57 | 6  | 0 | -3.455299 | 0.541400  | -0.366660 |
| 58 | 6  | 0 | -3.052722 | 0.833845  | 1.009876  |
| 59 | 6  | 0 | -3.401346 | 2.197221  | 1.583790  |
| 60 | 6  | 0 | -3.346151 | 3.311386  | 0.526259  |
| 61 | 6  | 0 | -4.186119 | 2.943348  | -0.706401 |
| 62 | 1  | 0 | -3.187673 | 0.020670  | 1.727793  |
| 63 | 1  | 0 | -3.443429 | -0.488251 | -0.690685 |
| 64 | 1  | 0 | -2.776464 | 1.807898  | -1.924520 |
| 65 | 1  | 0 | -4.449589 | 1.276020  | -2.082146 |
| 66 | 1  | 0 | -4.415712 | 2.120307  | 1.995735  |
| 67 | 1  | 0 | -2.719540 | 2.413387  | 2.417174  |
| 68 | 1  | 0 | -3.713883 | 4.247831  | 0.965156  |
| 69 | 1  | 0 | -2.303380 | 3.488185  | 0.230693  |
| 70 | 1  | 0 | -5.231650 | 2.806640  | -0.404664 |
| 71 | 1  | 0 | -4.158276 | 3.754608  | -1.445216 |
| 72 | 8  | 0 | -1.809274 | 0.769228  | 0.312631  |
| 73 | 53 | 0 | -6.366939 | -0.297640 | 0.099848  |

-----  
Zero-point correction= 0.599644 (Hartree/Particle)  
Thermal correction to Energy= 0.636027  
Thermal correction to Enthalpy= 0.636971  
Thermal correction to Gibbs Free Energy= 0.524819  
Sum of electronic and zero-point Energies= -1616.982909  
Sum of electronic and thermal Energies= -1616.946526  
Sum of electronic and thermal Enthalpies= -1616.945582  
Sum of electronic and thermal Free Energies= -1617.057734

M06 /6-311++G(d,p)-SDD //B3LYP /6-31G(d)-LANL2DZ energy in dichloromethane solvent = -2021.2699

## 1-int2

-----

| Center<br>Number | Atomic<br>Number | Atomic<br>Type | Coordinates (Angstroms) |           |           |
|------------------|------------------|----------------|-------------------------|-----------|-----------|
|                  |                  |                | X                       | Y         | Z         |
| 1                | 57               | 0              | 0.538306                | -0.077640 | -0.294460 |
| 2                | 8                | 0              | 0.305421                | 0.820594  | 1.899356  |
| 3                | 8                | 0              | 1.928314                | -1.866159 | 0.503641  |
| 4                | 8                | 0              | -0.232166               | 1.388350  | -2.099620 |
| 5                | 7                | 0              | 3.336141                | 0.190355  | -1.242598 |
| 6                | 7                | 0              | 1.769749                | 2.705249  | -0.128079 |
| 7                | 7                | 0              | 1.156801                | -1.376023 | -2.850235 |
| 8                | 6                | 0              | 3.221517                | 2.565622  | -0.324668 |
| 9                | 1                | 0              | 3.657070                | 2.219635  | 0.615266  |
| 10               | 1                | 0              | 3.682171                | 3.551339  | -0.534900 |
| 11               | 6                | 0              | 1.905730                | 2.519525  | 2.402510  |
| 12               | 6                | 0              | 2.603488                | 1.111142  | 4.724838  |
| 13               | 1                | 0              | 2.869423                | 0.557807  | 5.624233  |
| 14               | 6                | 0              | 4.378566                | -4.567099 | 0.563380  |
| 15               | 1                | 0              | 4.415022                | -5.635938 | 0.769292  |
| 16               | 6                | 0              | 1.238419                | 1.293698  | 2.699916  |
| 17               | 6                | 0              | -2.413676               | 4.806829  | -1.158750 |
| 18               | 6                | 0              | -1.028446               | 4.768956  | -0.982283 |
| 19               | 1                | 0              | -0.507966               | 5.646429  | -0.598259 |
| 20               | 6                | 0              | 4.265941                | -1.814800 | 0.043972  |
| 21               | 6                | 0              | 1.613877                | 0.611541  | 3.884590  |

|    |   |   |           |           |           |
|----|---|---|-----------|-----------|-----------|
| 22 | 6 | 0 | 3.612405  | 1.623565  | -1.469377 |
| 23 | 1 | 0 | 3.090433  | 1.921245  | -2.382930 |
| 24 | 1 | 0 | 4.693935  | 1.764370  | -1.664864 |
| 25 | 6 | 0 | 3.068223  | -2.499535 | 0.415252  |
| 26 | 6 | 0 | -3.058543 | 3.672926  | -1.665709 |
| 27 | 1 | 0 | -4.137520 | 3.682040  | -1.810178 |
| 28 | 6 | 0 | -0.932498 | 2.466755  | -1.806811 |
| 29 | 6 | 0 | 3.166604  | -3.893118 | 0.670849  |
| 30 | 6 | 0 | -0.284626 | 3.627912  | -1.292331 |
| 31 | 6 | 0 | 2.896417  | 2.999779  | 3.266361  |
| 32 | 1 | 0 | 3.385420  | 3.943947  | 3.024808  |
| 33 | 6 | 0 | 3.258323  | 2.311925  | 4.426188  |
| 34 | 6 | 0 | -2.337705 | 2.525839  | -1.988178 |
| 35 | 6 | 0 | 1.215543  | 3.594971  | -1.189646 |
| 36 | 1 | 0 | 1.609150  | 3.236610  | -2.145285 |
| 37 | 1 | 0 | 1.606585  | 4.618221  | -1.033303 |
| 38 | 6 | 0 | 1.469145  | 3.315502  | 1.200474  |
| 39 | 1 | 0 | 0.383202  | 3.449990  | 1.224278  |
| 40 | 1 | 0 | 1.926967  | 4.322260  | 1.244967  |
| 41 | 6 | 0 | 5.470499  | -2.518131 | -0.059899 |
| 42 | 1 | 0 | 6.371538  | -1.972325 | -0.340546 |
| 43 | 6 | 0 | 4.229848  | -0.320827 | -0.150821 |
| 44 | 1 | 0 | 3.885441  | 0.148284  | 0.778079  |
| 45 | 1 | 0 | 5.259109  | 0.038470  | -0.333648 |
| 46 | 6 | 0 | 5.546603  | -3.889025 | 0.194605  |
| 47 | 6 | 0 | 3.522772  | -0.551061 | -2.509961 |
| 48 | 1 | 0 | 3.832597  | -1.566917 | -2.261500 |
| 49 | 1 | 0 | 4.349799  | -0.111927 | -3.097090 |
| 50 | 6 | 0 | 1.472210  | -2.806475 | -2.739159 |
| 51 | 1 | 0 | 2.305954  | -2.981465 | -2.059409 |
| 52 | 1 | 0 | 1.712759  | -3.245435 | -3.726283 |
| 53 | 1 | 0 | 0.602162  | -3.326230 | -2.328597 |
| 54 | 6 | 0 | 2.275713  | -0.590814 | -3.401290 |
| 55 | 1 | 0 | 1.895893  | 0.423172  | -3.568395 |
| 56 | 1 | 0 | 2.579296  | -0.992462 | -4.389184 |
| 57 | 6 | 0 | -0.033087 | -1.208666 | -3.702752 |
| 58 | 1 | 0 | -0.861491 | -1.774724 | -3.267300 |
| 59 | 1 | 0 | 0.151323  | -1.578354 | -4.729182 |
| 60 | 1 | 0 | -0.316232 | -0.155067 | -3.720498 |
| 61 | 1 | 0 | -2.978019 | 5.700915  | -0.906459 |
| 62 | 1 | 0 | -2.836748 | 1.646484  | -2.387707 |
| 63 | 1 | 0 | 4.030780  | 2.703931  | 5.083067  |
| 64 | 1 | 0 | 1.103708  | -0.320918 | 4.110795  |
| 65 | 1 | 0 | 2.257676  | -4.414210 | 0.960517  |
| 66 | 1 | 0 | 6.494303  | -4.414679 | 0.110910  |
| 67 | 6 | 0 | -3.263081 | -0.513898 | 2.013526  |
| 68 | 6 | 0 | -3.548193 | -0.598296 | 0.520703  |
| 69 | 6 | 0 | -2.744020 | -1.692650 | -0.214876 |
| 70 | 6 | 0 | -2.826559 | -3.046138 | 0.521996  |
| 71 | 6 | 0 | -2.446156 | -2.918168 | 2.004702  |
| 72 | 6 | 0 | -3.323358 | -1.876805 | 2.719100  |
| 73 | 1 | 0 | -3.164984 | -1.815713 | -1.228355 |
| 74 | 1 | 0 | -3.432825 | 0.360329  | 0.016957  |
| 75 | 1 | 0 | -2.243865 | -0.108581 | 2.099769  |
| 76 | 1 | 0 | -3.930356 | 0.211672  | 2.491024  |
| 77 | 1 | 0 | -3.844314 | -3.450126 | 0.430852  |
| 78 | 1 | 0 | -2.148918 | -3.743816 | 0.013860  |
| 79 | 1 | 0 | -2.539461 | -3.893474 | 2.502379  |
| 80 | 1 | 0 | -1.392975 | -2.620812 | 2.077790  |

|    |    |   |           |           |           |
|----|----|---|-----------|-----------|-----------|
| 81 | 1  | 0 | -4.364829 | -2.227303 | 2.745390  |
| 82 | 1  | 0 | -3.001233 | -1.758065 | 3.762113  |
| 83 | 8  | 0 | -1.444473 | -1.219771 | -0.268932 |
| 84 | 53 | 0 | -5.822272 | -0.911324 | 0.173280  |

-----  
Zero-point correction= 0.704062 (Hartree/Particle)  
Thermal correction to Energy= 0.744881  
Thermal correction to Enthalpy= 0.745825  
Thermal correction to Gibbs Free Energy= 0.626526  
Sum of electronic and zero-point Energies= -1790.169318  
Sum of electronic and thermal Energies= -1790.128499  
Sum of electronic and thermal Enthalpies= -1790.127555  
Sum of electronic and thermal Free Energies= -1790.246854

M06 /6-311++G(d,p)-SDD //B3LYP /6-31G(d)-LANL2DZ energy in dichloromethane solvent = -2194.5003

## b-int2

-----

| Center<br>Number | Atomic<br>Number | Atomic<br>Type | Coordinates (Angstroms) |           |           |
|------------------|------------------|----------------|-------------------------|-----------|-----------|
|                  |                  |                | X                       | Y         | Z         |
| 1                | 57               | 0              | 0.457895                | 0.340533  | 0.130433  |
| 2                | 8                | 0              | 1.167102                | -0.104042 | 2.357772  |
| 3                | 8                | 0              | 0.236219                | -0.531495 | -2.079067 |
| 4                | 8                | 0              | 1.177694                | 2.529176  | -0.350005 |
| 5                | 7                | 0              | 3.283445                | 0.221083  | -0.452352 |
| 6                | 7                | 0              | 1.562722                | -2.264852 | 0.146904  |
| 7                | 6                | 0              | 4.186804                | 0.470935  | 0.679955  |
| 8                | 1                | 0              | 4.009519                | 1.472878  | 1.074202  |
| 9                | 1                | 0              | 4.001066                | -0.245493 | 1.481453  |
| 10               | 1                | 0              | 5.247480                | 0.398986  | 0.374105  |
| 11               | 6                | 0              | 3.502493                | -1.124222 | -1.021300 |
| 12               | 1                | 0              | 2.999188                | -1.164705 | -1.988283 |
| 13               | 1                | 0              | 4.581837                | -1.282987 | -1.215584 |
| 14               | 6                | 0              | 3.015465                | -2.284035 | -0.140907 |
| 15               | 1                | 0              | 3.540908                | -2.262738 | 0.816161  |
| 16               | 6                | 0              | 1.243601                | -2.841875 | 1.496510  |
| 17               | 1                | 0              | 0.168848                | -2.663816 | 1.646922  |
| 18               | 6                | 0              | 3.474947                | -2.743703 | 4.591207  |
| 19               | 6                | 0              | 3.345516                | -1.403907 | 4.976288  |
| 20               | 1                | 0              | 3.856210                | -1.044239 | 5.868279  |
| 21               | 6                | 0              | 2.570785                | -0.521765 | 4.231319  |
| 22               | 6                | 0              | 1.887042                | -0.942793 | 3.061353  |
| 23               | 6                | 0              | 0.765405                | -3.055928 | -0.845667 |
| 24               | 1                | 0              | 0.953802                | -4.128975 | -0.664225 |
| 25               | 1                | 0              | -0.289632               | -2.874157 | -0.593269 |
| 26               | 6                | 0              | 0.986025                | -2.782477 | -2.311915 |
| 27               | 6                | 0              | 1.449373                | -3.795610 | -3.157586 |
| 28               | 6                | 0              | 1.583012                | -3.602231 | -4.534150 |
| 29               | 6                | 0              | 1.237027                | -2.357878 | -5.073047 |
| 30               | 1                | 0              | 1.329977                | -2.186258 | -6.144345 |
| 31               | 6                | 0              | 0.775217                | -1.331519 | -4.255074 |
| 32               | 6                | 0              | 0.641136                | -1.508336 | -2.854912 |
| 33               | 6                | 0              | 3.486838                | 1.233222  | -1.534542 |
| 34               | 1                | 0              | 4.458561                | 1.041965  | -2.025447 |
| 35               | 1                | 0              | 2.705231                | 1.039674  | -2.280835 |
| 36               | 6                | 0              | 3.451314                | 2.680165  | -1.100029 |
| 37               | 6                | 0              | 2.262038                | 3.247767  | -0.550498 |
| 38               | 6                | 0              | 2.280631                | 4.626698  | -0.224558 |
| 39               | 6                | 0              | 3.414044                | 5.407138  | -0.424360 |

|    |    |   |           |           |           |
|----|----|---|-----------|-----------|-----------|
| 40 | 1  | 0 | 3.389776  | 6.463542  | -0.160972 |
| 41 | 6  | 0 | 4.579260  | 4.846452  | -0.958305 |
| 42 | 6  | 0 | 4.577572  | 3.489659  | -1.285848 |
| 43 | 1  | 0 | 5.476482  | 3.038980  | -1.706017 |
| 44 | 1  | 0 | 1.703138  | -4.762672 | -2.723643 |
| 45 | 1  | 0 | 5.468669  | 5.451254  | -1.115847 |
| 46 | 1  | 0 | 1.943908  | -4.405042 | -5.171773 |
| 47 | 1  | 0 | 1.377877  | -3.937267 | 1.456349  |
| 48 | 6  | 0 | 2.018061  | -2.311712 | 2.676270  |
| 49 | 6  | 0 | 2.806669  | -3.176360 | 3.444877  |
| 50 | 1  | 0 | 2.889818  | -4.218326 | 3.135867  |
| 51 | 1  | 0 | 4.079745  | -3.435235 | 5.171975  |
| 52 | 1  | 0 | 3.300340  | -3.225081 | -0.639261 |
| 53 | 1  | 0 | 1.370591  | 5.054213  | 0.188584  |
| 54 | 1  | 0 | 0.506864  | -0.362000 | -4.666882 |
| 55 | 1  | 0 | 2.464484  | 0.519202  | 4.525478  |
| 56 | 6  | 0 | -3.981737 | 1.528802  | -1.112418 |
| 57 | 6  | 0 | -3.949015 | 0.252932  | -0.281612 |
| 58 | 6  | 0 | -3.113794 | 0.369372  | 1.012831  |
| 59 | 6  | 0 | -3.484987 | 1.636994  | 1.811441  |
| 60 | 6  | 0 | -3.429426 | 2.905263  | 0.946475  |
| 61 | 6  | 0 | -4.332068 | 2.778397  | -0.291645 |
| 62 | 1  | 0 | -3.318457 | -0.513370 | 1.642901  |
| 63 | 1  | 0 | -3.623996 | -0.609471 | -0.860985 |
| 64 | 1  | 0 | -2.963045 | 1.636087  | -1.512143 |
| 65 | 1  | 0 | -4.649569 | 1.414229  | -1.972833 |
| 66 | 1  | 0 | -4.492740 | 1.519680  | 2.233149  |
| 67 | 1  | 0 | -2.784811 | 1.716209  | 2.652015  |
| 68 | 1  | 0 | -3.727712 | 3.779597  | 1.540943  |
| 69 | 1  | 0 | -2.393990 | 3.077703  | 0.626273  |
| 70 | 1  | 0 | -5.383750 | 2.722625  | 0.021928  |
| 71 | 1  | 0 | -4.237314 | 3.668742  | -0.927554 |
| 72 | 8  | 0 | -1.795457 | 0.389263  | 0.593353  |
| 73 | 53 | 0 | -6.108725 | -0.418823 | 0.200367  |

-----  
Zero-point correction= 0.600460 (Hartree/Particle)

Thermal correction to Energy= 0.636697

Thermal correction to Enthalpy= 0.637641

Thermal correction to Gibbs Free Energy= 0.527258

Sum of electronic and zero-point Energies= -1617.002240

Sum of electronic and thermal Energies= -1616.966002

Sum of electronic and thermal Enthalpies= -1616.965058

Sum of electronic and thermal Free Energies= -1617.075441

M06 /6-311++G(d,p)-SDD //B3LYP /6-31G(d)-LANL2DZ energy in dichloromethane solvent = -2021.2992

## CO<sub>2</sub>

-----

| Center<br>Number | Atomic<br>Number | Atomic<br>Type | Coordinates (Angstroms) |          |           |
|------------------|------------------|----------------|-------------------------|----------|-----------|
|                  |                  |                | X                       | Y        | Z         |
| 1                | 6                | 0              | 0.000000                | 0.000000 | 0.000000  |
| 2                | 8                | 0              | 0.000000                | 0.000000 | 1.169148  |
| 3                | 8                | 0              | 0.000000                | 0.000000 | -1.169148 |

-----

Zero-point correction= 0.011592 (Hartree/Particle)

Thermal correction to Energy= 0.014240

Thermal correction to Enthalpy= 0.015184

Thermal correction to Gibbs Free Energy= -0.009126

Sum of electronic and zero-point Energies= -188.569347



Sum of electronic and thermal Energies= -188.566700  
 Sum of electronic and thermal Enthalpies= -188.565756  
 Sum of electronic and thermal Free Energies= -188.590066  
 M06 /6-311++G(d,p)-SDD //B3LYP /6-31G(d)-LANL2DZ energy in dichloromethane solvent = -188.55846

## 1-ts2

| Center<br>Number | Atomic<br>Number | Atomic<br>Type | Coordinates (Angstroms) |           |           |
|------------------|------------------|----------------|-------------------------|-----------|-----------|
|                  |                  |                | X                       | Y         | Z         |
| 1                | 57               | 0              | -0.778572               | -0.499486 | 0.183611  |
| 2                | 8                | 0              | -0.409229               | 1.381745  | -1.205916 |
| 3                | 8                | 0              | -2.463316               | -1.212681 | -1.348459 |
| 4                | 8                | 0              | 0.046890                | -0.724518 | 2.449734  |
| 5                | 7                | 0              | -3.445051               | 0.603124  | 0.925103  |
| 6                | 7                | 0              | -0.815501               | 2.164782  | 1.635053  |
| 7                | 7                | 0              | -2.736254               | -2.293884 | 1.899662  |
| 8                | 6                | 0              | -2.171734               | 2.728242  | 1.526954  |
| 9                | 1                | 0              | -2.296592               | 3.115691  | 0.514457  |
| 10               | 1                | 0              | -2.288060               | 3.596078  | 2.206358  |
| 11               | 6                | 0              | -0.139485               | 3.596475  | -0.362402 |
| 12               | 6                | 0              | -0.654903               | 4.580400  | -2.940093 |
| 13               | 1                | 0              | -0.855128               | 4.953934  | -3.943062 |
| 14               | 6                | 0              | -5.565521               | -1.823665 | -3.161499 |
| 15               | 1                | 0              | -5.965678               | -2.545372 | -3.872195 |
| 16               | 6                | 0              | -0.402534               | 2.678074  | -1.419749 |
| 17               | 6                | 0              | 3.139484                | 1.417045  | 4.230575  |
| 18               | 6                | 0              | 1.921816                | 2.032061  | 3.932570  |
| 19               | 1                | 0              | 1.774848                | 3.084441  | 4.175349  |
| 20               | 6                | 0              | -4.509481               | 0.029488  | -1.333954 |
| 21               | 6                | 0              | -0.661220               | 3.208366  | -2.708292 |
| 22               | 6                | 0              | -3.296613               | 1.745421  | 1.849370  |
| 23               | 1                | 0              | -3.154807               | 1.343590  | 2.856069  |
| 24               | 1                | 0              | -4.241513               | 2.322968  | 1.878792  |
| 25               | 6                | 0              | -3.688480               | -1.053581 | -1.779902 |
| 26               | 6                | 0              | 3.303394                | 0.063207  | 3.915966  |
| 27               | 1                | 0              | 4.246756                | -0.433754 | 4.134846  |
| 28               | 6                | 0              | 1.032325                | -0.050322 | 3.008117  |
| 29               | 6                | 0              | -4.261385               | -1.969555 | -2.701494 |
| 30               | 6                | 0              | 0.875284                | 1.329687  | 3.328747  |
| 31               | 6                | 0              | -0.147777               | 4.970827  | -0.622137 |
| 32               | 1                | 0              | 0.052167                | 5.657826  | 0.200016  |
| 33               | 6                | 0              | -0.397090               | 5.478630  | -1.898889 |
| 34               | 6                | 0              | 2.273315                | -0.660198 | 3.320870  |
| 35               | 6                | 0              | -0.462987               | 1.970116  | 3.070107  |
| 36               | 1                | 0              | -1.236786               | 1.331631  | 3.507657  |
| 37               | 1                | 0              | -0.509225               | 2.949548  | 3.583582  |
| 38               | 6                | 0              | 0.188578                | 3.084162  | 1.018972  |
| 39               | 1                | 0              | 1.137491                | 2.536329  | 1.012485  |
| 40               | 1                | 0              | 0.336198                | 3.953888  | 1.685441  |
| 41               | 6                | 0              | -5.820803               | 0.145436  | -1.808662 |
| 42               | 1                | 0              | -6.429337               | 0.978348  | -1.456435 |
| 43               | 6                | 0              | -3.955198               | 1.084585  | -0.403969 |
| 44               | 1                | 0              | -3.119886               | 1.600148  | -0.890859 |
| 45               | 1                | 0              | -4.743822               | 1.838640  | -0.230582 |
| 46               | 6                | 0              | -6.363797               | -0.762933 | -2.719355 |
| 47               | 6                | 0              | -4.348052               | -0.387306 | 1.548498  |
| 48               | 1                | 0              | -4.817303               | -0.967573 | 0.754320  |
| 49               | 1                | 0              | -5.170795               | 0.122613  | 2.083148  |

|    |    |   |           |           |           |
|----|----|---|-----------|-----------|-----------|
| 50 | 6  | 0 | -3.480228 | -3.282325 | 1.107128  |
| 51 | 1  | 0 | -3.992925 | -2.810749 | 0.268576  |
| 52 | 1  | 0 | -4.222206 | -3.821961 | 1.727718  |
| 53 | 1  | 0 | -2.776249 | -4.005584 | 0.692449  |
| 54 | 6  | 0 | -3.641256 | -1.323155 | 2.531421  |
| 55 | 1  | 0 | -3.045171 | -0.742934 | 3.244760  |
| 56 | 1  | 0 | -4.419423 | -1.848966 | 3.122445  |
| 57 | 6  | 0 | -1.969095 | -2.986886 | 2.945390  |
| 58 | 1  | 0 | -1.320103 | -3.731387 | 2.478462  |
| 59 | 1  | 0 | -2.635284 | -3.501785 | 3.664705  |
| 60 | 1  | 0 | -1.333676 | -2.267504 | 3.464516  |
| 61 | 1  | 0 | 3.944425  | 1.981467  | 4.693936  |
| 62 | 1  | 0 | 2.396161  | -1.712636 | 3.078213  |
| 63 | 1  | 0 | -0.392784 | 6.551103  | -2.076089 |
| 64 | 1  | 0 | -0.861935 | 2.502882  | -3.510116 |
| 65 | 1  | 0 | -3.634018 | -2.788843 | -3.043404 |
| 66 | 1  | 0 | -7.383880 | -0.644610 | -3.075521 |
| 67 | 6  | 0 | 3.013374  | 1.043595  | -1.244284 |
| 68 | 6  | 0 | 3.312647  | -0.319888 | -0.642876 |
| 69 | 6  | 0 | 2.503170  | -1.489781 | -1.244191 |
| 70 | 6  | 0 | 2.473659  | -1.425408 | -2.786280 |
| 71 | 6  | 0 | 2.072302  | -0.044061 | -3.322942 |
| 72 | 6  | 0 | 3.002407  | 1.052173  | -2.779209 |
| 73 | 1  | 0 | 3.002188  | -2.425684 | -0.956162 |
| 74 | 1  | 0 | 3.240981  | -0.326176 | 0.444250  |
| 75 | 1  | 0 | 2.001581  | 1.300302  | -0.902032 |
| 76 | 1  | 0 | 3.691343  | 1.802397  | -0.839156 |
| 77 | 1  | 0 | 3.467812  | -1.694020 | -3.170579 |
| 78 | 1  | 0 | 1.774067  | -2.194670 | -3.135429 |
| 79 | 1  | 0 | 2.097269  | -0.049086 | -4.421706 |
| 80 | 1  | 0 | 1.042700  | 0.184163  | -3.023708 |
| 81 | 1  | 0 | 4.023930  | 0.899846  | -3.155812 |
| 82 | 1  | 0 | 2.672217  | 2.038594  | -3.128300 |
| 83 | 8  | 0 | 1.221891  | -1.452957 | -0.685616 |
| 84 | 53 | 0 | 5.576854  | -0.764815 | -0.851975 |
| 85 | 6  | 0 | 0.560140  | -3.738133 | -0.449472 |
| 86 | 8  | 0 | 1.488892  | -4.273312 | -0.919686 |
| 87 | 8  | 0 | -0.469889 | -3.464546 | 0.059757  |

-----  
Zero-point correction= 0.716917 (Hartree/Particle)  
Thermal correction to Energy= 0.760866  
Thermal correction to Enthalpy= 0.761810  
Thermal correction to Gibbs Free Energy= 0.636770  
Sum of electronic and zero-point Energies= -1978.732881  
Sum of electronic and thermal Energies= -1978.688932  
Sum of electronic and thermal Enthalpies= -1978.687988  
Sum of electronic and thermal Free Energies= -1978.813027  
M06 /6-311++G(d,p)-SDD //B3LYP /6-31G(d)-LANL2DZ energy in dichloromethane solvent = -2383.0666

## b-ts2

-----

| Center<br>Number | Atomic<br>Number | Atomic<br>Type | Coordinates (Angstroms) |           |           |
|------------------|------------------|----------------|-------------------------|-----------|-----------|
|                  |                  |                | X                       | Y         | Z         |
| 1                | 57               | 0              | -0.507486               | 0.023164  | -0.375534 |
| 2                | 8                | 0              | -1.783773               | -0.646786 | -2.255065 |
| 3                | 8                | 0              | -0.027682               | -0.449506 | 1.904726  |
| 4                | 8                | 0              | -0.487240               | 2.366665  | -0.435217 |
| 5                | 7                | 0              | -2.997189               | 1.099447  | 0.713420  |

|    |   |   |           |           |           |
|----|---|---|-----------|-----------|-----------|
| 6  | 7 | 0 | -2.437154 | -1.916167 | 0.534625  |
| 7  | 6 | 0 | -4.011722 | 1.419690  | -0.302390 |
| 8  | 1 | 0 | -3.627027 | 2.190095  | -0.972438 |
| 9  | 1 | 0 | -4.244936 | 0.537203  | -0.899941 |
| 10 | 1 | 0 | -4.943565 | 1.794682  | 0.160732  |
| 11 | 6 | 0 | -3.499035 | 0.088188  | 1.664113  |
| 12 | 1 | 0 | -2.804928 | 0.046231  | 2.504813  |
| 13 | 1 | 0 | -4.478869 | 0.406503  | 2.072986  |
| 14 | 6 | 0 | -3.677942 | -1.313157 | 1.072284  |
| 15 | 1 | 0 | -4.405458 | -1.274167 | 0.258679  |
| 16 | 6 | 0 | -2.740999 | -2.832520 | -0.614548 |
| 17 | 1 | 0 | -1.773312 | -3.211630 | -0.958773 |
| 18 | 6 | 0 | -5.450276 | -2.337146 | -3.258639 |
| 19 | 6 | 0 | -4.893739 | -1.316220 | -4.037007 |
| 20 | 1 | 0 | -5.424126 | -0.951276 | -4.915139 |
| 21 | 6 | 0 | -3.665501 | -0.757839 | -3.699843 |
| 22 | 6 | 0 | -2.936620 | -1.197179 | -2.565804 |
| 23 | 6 | 0 | -1.722654 | -2.746208 | 1.558670  |
| 24 | 1 | 0 | -2.317569 | -3.659679 | 1.738618  |
| 25 | 1 | 0 | -0.785742 | -3.065198 | 1.085891  |
| 26 | 6 | 0 | -1.425322 | -2.113921 | 2.897095  |
| 27 | 6 | 0 | -1.965881 | -2.658975 | 4.066606  |
| 28 | 6 | 0 | -1.651722 | -2.155395 | 5.330786  |
| 29 | 6 | 0 | -0.767225 | -1.075601 | 5.421465  |
| 30 | 1 | 0 | -0.505480 | -0.667781 | 6.396470  |
| 31 | 6 | 0 | -0.216258 | -0.511629 | 4.274748  |
| 32 | 6 | 0 | -0.529076 | -1.007351 | 2.985409  |
| 33 | 6 | 0 | -2.619385 | 2.317276  | 1.493124  |
| 34 | 1 | 0 | -3.455367 | 2.587348  | 2.164043  |
| 35 | 1 | 0 | -1.778265 | 2.018635  | 2.132992  |
| 36 | 6 | 0 | -2.254106 | 3.532631  | 0.676035  |
| 37 | 6 | 0 | -1.164882 | 3.478907  | -0.240638 |
| 38 | 6 | 0 | -0.830897 | 4.662318  | -0.942407 |
| 39 | 6 | 0 | -1.539386 | 5.843574  | -0.748051 |
| 40 | 1 | 0 | -1.254874 | 6.735632  | -1.303878 |
| 41 | 6 | 0 | -2.610689 | 5.892281  | 0.150335  |
| 42 | 6 | 0 | -2.953041 | 4.732041  | 0.847174  |
| 43 | 1 | 0 | -3.785175 | 4.753669  | 1.550515  |
| 44 | 1 | 0 | -2.645410 | -3.506574 | 3.980410  |
| 45 | 1 | 0 | -3.168342 | 6.812648  | 0.303773  |
| 46 | 1 | 0 | -2.084156 | -2.598529 | 6.224078  |
| 47 | 1 | 0 | -3.307259 | -3.701734 | -0.233582 |
| 48 | 6 | 0 | -3.503401 | -2.245162 | -1.778514 |
| 49 | 6 | 0 | -4.744050 | -2.784557 | -2.140975 |
| 50 | 1 | 0 | -5.159805 | -3.585545 | -1.529763 |
| 51 | 1 | 0 | -6.410411 | -2.776117 | -3.517100 |
| 52 | 1 | 0 | -4.113446 | -1.956225 | 1.855055  |
| 53 | 1 | 0 | 0.002502  | 4.614891  | -1.638361 |
| 54 | 1 | 0 | 0.469473  | 0.329451  | 4.336562  |
| 55 | 1 | 0 | -3.226287 | 0.035732  | -4.298829 |
| 56 | 6 | 0 | 3.586848  | 0.387433  | 1.272263  |
| 57 | 6 | 0 | 3.836748  | -0.404025 | -0.002763 |
| 58 | 6 | 0 | 3.074332  | 0.121881  | -1.241252 |
| 59 | 6 | 0 | 3.233077  | 1.649157  | -1.390036 |
| 60 | 6 | 0 | 2.950185  | 2.429128  | -0.095260 |
| 61 | 6 | 0 | 3.778800  | 1.899150  | 1.085723  |
| 62 | 1 | 0 | 3.496809  | -0.358055 | -2.136824 |
| 63 | 1 | 0 | 3.657005  | -1.469812 | 0.127360  |
| 64 | 1 | 0 | 2.541487  | 0.182904  | 1.550445  |

|    |    |   |          |           |           |
|----|----|---|----------|-----------|-----------|
| 65 | 1  | 0 | 4.207770 | 0.004565  | 2.089686  |
| 66 | 1  | 0 | 4.258187 | 1.857690  | -1.726424 |
| 67 | 1  | 0 | 2.556837 | 1.981027  | -2.187405 |
| 68 | 1  | 0 | 3.170078 | 3.493514  | -0.256028 |
| 69 | 1  | 0 | 1.881757 | 2.374586  | 0.140473  |
| 70 | 1  | 0 | 4.844413 | 2.108953  | 0.918327  |
| 71 | 1  | 0 | 3.494812 | 2.417962  | 2.010837  |
| 72 | 8  | 0 | 1.749468 | -0.285142 | -1.071836 |
| 73 | 53 | 0 | 6.106133 | -0.486676 | -0.436457 |
| 74 | 6  | 0 | 1.576274 | -2.534845 | -1.651910 |
| 75 | 8  | 0 | 0.576539 | -2.714778 | -1.044162 |
| 76 | 8  | 0 | 2.533435 | -2.655782 | -2.316158 |

-----  
 Zero-point correction= 0.613528 (Hartree/Particle)

Thermal correction to Energy= 0.652759

Thermal correction to Enthalpy= 0.653703

Thermal correction to Gibbs Free Energy= 0.538155

Sum of electronic and zero-point Energies= -1805.572679

Sum of electronic and thermal Energies= -1805.533447

Sum of electronic and thermal Enthalpies= -1805.532503

Sum of electronic and thermal Free Energies= -1805.648051

M06/6-311++G(d,p)-SDD //B3LYP/6-31G(d)-LANL2DZ energy in dichloromethane solvent = -2209.8712

### 1-int3

-----

| Center<br>Number | Atomic<br>Number | Atomic<br>Type | Coordinates (Angstroms) |           |           |
|------------------|------------------|----------------|-------------------------|-----------|-----------|
|                  |                  |                | X                       | Y         | Z         |
| 1                | 57               | 0              | -0.933427               | -0.382401 | 0.446911  |
| 2                | 8                | 0              | -0.091842               | 0.556395  | -1.562874 |
| 3                | 8                | 0              | -2.595037               | -1.518497 | -0.829227 |
| 4                | 8                | 0              | 0.133136                | 0.650690  | 2.345331  |
| 5                | 7                | 0              | -3.630799               | 0.802176  | 0.821360  |
| 6                | 7                | 0              | -1.159197               | 2.708195  | 0.412863  |
| 7                | 7                | 0              | -2.468889               | -1.341025 | 2.724069  |
| 8                | 6                | 0              | -2.582172               | 3.060445  | 0.293442  |
| 9                | 1                | 0              | -2.871354               | 2.950720  | -0.753608 |
| 10               | 1                | 0              | -2.743431               | 4.126705  | 0.549331  |
| 11               | 6                | 0              | -0.800143               | 2.774463  | -2.094480 |
| 12               | 6                | 0              | -1.479473               | 1.888897  | -4.668706 |
| 13               | 1                | 0              | -1.742585               | 1.536679  | -5.664691 |
| 14               | 6                | 0              | -5.697580               | -3.200401 | -1.751412 |
| 15               | 1                | 0              | -6.032138               | -4.181079 | -2.086234 |
| 16               | 6                | 0              | -0.599407               | 1.405675  | -2.437161 |
| 17               | 6                | 0              | 3.100153                | 3.563478  | 2.498970  |
| 18               | 6                | 0              | 1.804816                | 3.882058  | 2.085555  |
| 19               | 1                | 0              | 1.565046                | 4.907093  | 1.802842  |
| 20               | 6                | 0              | -4.819224               | -0.682218 | -0.892023 |
| 21               | 6                | 0              | -0.952820               | 0.991698  | -3.744532 |
| 22               | 6                | 0              | -3.509437               | 2.230028  | 1.184208  |
| 23               | 1                | 0              | -3.169257               | 2.285103  | 2.221912  |
| 24               | 1                | 0              | -4.510977               | 2.701810  | 1.158725  |
| 25               | 6                | 0              | -3.864334               | -1.726951 | -1.071696 |
| 26               | 6                | 0              | 3.381041                | 2.244630  | 2.873204  |
| 27               | 1                | 0              | 4.383363                | 1.975536  | 3.201189  |
| 28               | 6                | 0              | 1.075751                | 1.570270  | 2.398497  |
| 29               | 6                | 0              | -4.344610               | -2.988625 | -1.506811 |
| 30               | 6                | 0              | 0.795330                | 2.917058  | 2.029230  |
| 31               | 6                | 0              | -1.330614               | 3.655203  | -3.043939 |

|    |    |   |           |           |           |
|----|----|---|-----------|-----------|-----------|
| 32 | 1  | 0 | -1.468404 | 4.700062  | -2.765461 |
| 33 | 6  | 0 | -1.673577 | 3.232543  | -4.329650 |
| 34 | 6  | 0 | 2.391344  | 1.265437  | 2.829630  |
| 35 | 6  | 0 | -0.623834 | 3.278783  | 1.681662  |
| 36 | 1  | 0 | -1.271805 | 2.922463  | 2.489153  |
| 37 | 1  | 0 | -0.722990 | 4.380692  | 1.643267  |
| 38 | 6  | 0 | -0.380048 | 3.262380  | -0.731775 |
| 39 | 1  | 0 | 0.662830  | 2.990377  | -0.542687 |
| 40 | 1  | 0 | -0.437417 | 4.367461  | -0.709428 |
| 41 | 6  | 0 | -6.174004 | -0.923061 | -1.142052 |
| 42 | 1  | 0 | -6.885378 | -0.109057 | -1.001794 |
| 43 | 6  | 0 | -4.337263 | 0.691177  | -0.502588 |
| 44 | 1  | 0 | -3.633817 | 1.051513  | -1.261790 |
| 45 | 1  | 0 | -5.199076 | 1.382210  | -0.501782 |
| 46 | 6  | 0 | -6.629481 | -2.171040 | -1.571965 |
| 47 | 6  | 0 | -4.364627 | 0.093070  | 1.894277  |
| 48 | 1  | 0 | -4.837671 | -0.784220 | 1.452037  |
| 49 | 1  | 0 | -5.184612 | 0.723529  | 2.284294  |
| 50 | 6  | 0 | -3.064254 | -2.647161 | 2.393836  |
| 51 | 1  | 0 | -3.731724 | -2.571464 | 1.534246  |
| 52 | 1  | 0 | -3.629064 | -3.057132 | 3.252035  |
| 53 | 1  | 0 | -2.256907 | -3.333010 | 2.128720  |
| 54 | 6  | 0 | -3.481966 | -0.332650 | 3.069971  |
| 55 | 1  | 0 | -2.948140 | 0.533331  | 3.478374  |
| 56 | 1  | 0 | -4.144553 | -0.705412 | 3.876327  |
| 57 | 6  | 0 | -1.530907 | -1.513456 | 3.848368  |
| 58 | 1  | 0 | -0.786020 | -2.260741 | 3.567408  |
| 59 | 1  | 0 | -2.058532 | -1.847923 | 4.760952  |
| 60 | 1  | 0 | -1.011294 | -0.572095 | 4.036810  |
| 61 | 1  | 0 | 3.873258  | 4.326681  | 2.530110  |
| 62 | 1  | 0 | 2.602441  | 0.241663  | 3.128522  |
| 63 | 1  | 0 | -2.083009 | 3.935382  | -5.050773 |
| 64 | 1  | 0 | -0.801667 | -0.053445 | -4.000220 |
| 65 | 1  | 0 | -3.615896 | -3.782737 | -1.646470 |
| 66 | 1  | 0 | -7.686391 | -2.336466 | -1.764184 |
| 67 | 6  | 0 | 3.242626  | 0.347664  | -1.550631 |
| 68 | 6  | 0 | 3.668045  | -0.516620 | -0.375247 |
| 69 | 6  | 0 | 3.064150  | -1.926795 | -0.367443 |
| 70 | 6  | 0 | 3.092537  | -2.606036 | -1.742630 |
| 71 | 6  | 0 | 2.566164  | -1.699981 | -2.865747 |
| 72 | 6  | 0 | 3.329377  | -0.366533 | -2.906182 |
| 73 | 1  | 0 | 3.561013  | -2.559493 | 0.368282  |
| 74 | 1  | 0 | 3.504565  | -0.020973 | 0.580832  |
| 75 | 1  | 0 | 2.186199  | 0.596767  | -1.366902 |
| 76 | 1  | 0 | 3.800235  | 1.290193  | -1.552361 |
| 77 | 1  | 0 | 4.129498  | -2.897744 | -1.956912 |
| 78 | 1  | 0 | 2.510334  | -3.530859 | -1.667304 |
| 79 | 1  | 0 | 2.652404  | -2.218827 | -3.829894 |
| 80 | 1  | 0 | 1.501575  | -1.491887 | -2.704295 |
| 81 | 1  | 0 | 4.382187  | -0.543537 | -3.169021 |
| 82 | 1  | 0 | 2.909307  | 0.286580  | -3.680936 |
| 83 | 8  | 0 | 1.699843  | -1.757231 | 0.083433  |
| 84 | 53 | 0 | 5.947496  | -0.721119 | -0.328004 |
| 85 | 6  | 0 | 1.154730  | -2.847106 | 0.838653  |
| 86 | 8  | 0 | 1.845458  | -3.821348 | 1.084820  |
| 87 | 8  | 0 | -0.056261 | -2.580212 | 1.140597  |

-----  
Zero-point correction= 0.719982 (Hartree/Particle)  
Thermal correction to Energy= 0.763295

Thermal correction to Enthalpy= 0.764239  
 Thermal correction to Gibbs Free Energy= 0.640681  
 Sum of electronic and zero-point Energies= -1978.755328  
 Sum of electronic and thermal Energies= -1978.712016  
 Sum of electronic and thermal Enthalpies= -1978.711071  
 Sum of electronic and thermal Free Energies= -1978.834630  
 M06 /6-311++G(d,p)-SDD //B3LYP /6-31G(d)-LANL2DZ energy in dichloromethane solvent = -2383.0814

### b-int3

| Center<br>Number | Atomic<br>Number | Atomic<br>Type | Coordinates (Angstroms) |           |           |
|------------------|------------------|----------------|-------------------------|-----------|-----------|
|                  |                  |                | X                       | Y         | Z         |
| 1                | 57               | 0              | -0.768096               | 0.040671  | -0.543961 |
| 2                | 8                | 0              | -2.495421               | 0.005289  | -2.149205 |
| 3                | 8                | 0              | 0.089937                | -0.762005 | 1.523959  |
| 4                | 8                | 0              | -0.441059               | 2.353987  | -0.220195 |
| 5                | 7                | 0              | -2.869498               | 0.964665  | 1.142288  |
| 6                | 7                | 0              | -2.516972               | -1.944134 | 0.286649  |
| 7                | 6                | 0              | -4.033694               | 1.541506  | 0.450928  |
| 8                | 1                | 0              | -3.716781               | 2.390813  | -0.155874 |
| 9                | 1                | 0              | -4.486581               | 0.803212  | -0.211485 |
| 10               | 1                | 0              | -4.794334               | 1.890965  | 1.172876  |
| 11               | 6                | 0              | -3.266626               | -0.201412 | 1.960437  |
| 12               | 1                | 0              | -2.447317               | -0.424321 | 2.644840  |
| 13               | 1                | 0              | -4.144944               | 0.055114  | 2.584056  |
| 14               | 6                | 0              | -3.616900               | -1.457603 | 1.150313  |
| 15               | 1                | 0              | -4.474862               | -1.251909 | 0.506550  |
| 16               | 6                | 0              | -3.020132               | -2.582113 | -0.980235 |
| 17               | 1                | 0              | -2.124898               | -2.789437 | -1.580979 |
| 18               | 6                | 0              | -6.220856               | -1.697359 | -2.862492 |
| 19               | 6                | 0              | -5.870301               | -0.473623 | -3.443338 |
| 20               | 1                | 0              | -6.579274               | 0.045899  | -4.085977 |
| 21               | 6                | 0              | -4.621208               | 0.090853  | -3.207516 |
| 22               | 6                | 0              | -3.665292               | -0.548109 | -2.379050 |
| 23               | 6                | 0              | -1.654862               | -2.972675 | 0.958934  |
| 24               | 1                | 0              | -2.230551               | -3.912114 | 1.025518  |
| 25               | 1                | 0              | -0.821286               | -3.158086 | 0.268358  |
| 26               | 6                | 0              | -1.121986               | -2.653361 | 2.334793  |
| 27               | 6                | 0              | -1.454909               | -3.466681 | 3.423103  |
| 28               | 6                | 0              | -0.918278               | -3.254391 | 4.694919  |
| 29               | 6                | 0              | -0.022230               | -2.196311 | 4.877250  |
| 30               | 1                | 0              | 0.410532                | -2.013415 | 5.859360  |
| 31               | 6                | 0              | 0.322976                | -1.367990 | 3.813286  |
| 32               | 6                | 0              | -0.215039               | -1.568694 | 2.519499  |
| 33               | 6                | 0              | -2.224789               | 1.977255  | 2.037400  |
| 34               | 1                | 0              | -2.879725               | 2.148114  | 2.910363  |
| 35               | 1                | 0              | -1.305082               | 1.508434  | 2.410327  |
| 36               | 6                | 0              | -1.920098               | 3.316035  | 1.405149  |
| 37               | 6                | 0              | -1.009323               | 3.418329  | 0.311730  |
| 38               | 6                | 0              | -0.728073               | 4.710593  | -0.194446 |
| 39               | 6                | 0              | -1.316038               | 5.848275  | 0.347886  |
| 40               | 1                | 0              | -1.075182               | 6.825393  | -0.067824 |
| 41               | 6                | 0              | -2.211386               | 5.744712  | 1.417515  |
| 42               | 6                | 0              | -2.500235               | 4.477849  | 1.926890  |
| 43               | 1                | 0              | -3.194761               | 4.381593  | 2.761005  |
| 44               | 1                | 0              | -2.146125               | -4.293755 | 3.263493  |
| 45               | 1                | 0              | -2.675224               | 6.629969  | 1.844865  |
| 46               | 1                | 0              | -1.190510               | -3.903140 | 5.523301  |

|    |    |   |           |           |           |
|----|----|---|-----------|-----------|-----------|
| 47 | 1  | 0 | -3.467801 | -3.558888 | -0.727747 |
| 48 | 6  | 0 | -4.022549 | -1.800538 | -1.794765 |
| 49 | 6  | 0 | -5.289548 | -2.341194 | -2.046175 |
| 50 | 1  | 0 | -5.544637 | -3.299586 | -1.594378 |
| 51 | 1  | 0 | -7.195996 | -2.141854 | -3.043596 |
| 52 | 1  | 0 | -3.930775 | -2.239889 | 1.860009  |
| 53 | 1  | 0 | -0.031772 | 4.781299  | -1.026034 |
| 54 | 1  | 0 | 1.014876  | -0.540675 | 3.948494  |
| 55 | 1  | 0 | -4.340554 | 1.041112  | -3.654280 |
| 56 | 6  | 0 | 3.615673  | 0.163409  | 1.068550  |
| 57 | 6  | 0 | 3.985694  | -0.485506 | -0.256617 |
| 58 | 6  | 0 | 3.318631  | 0.168249  | -1.477922 |
| 59 | 6  | 0 | 3.407254  | 1.696459  | -1.463634 |
| 60 | 6  | 0 | 3.019798  | 2.328999  | -0.115452 |
| 61 | 6  | 0 | 3.779394  | 1.690216  | 1.058449  |
| 62 | 1  | 0 | 3.747377  | -0.244113 | -2.392406 |
| 63 | 1  | 0 | 3.809911  | -1.558929 | -0.274204 |
| 64 | 1  | 0 | 2.557205  | -0.088985 | 1.240408  |
| 65 | 1  | 0 | 4.182096  | -0.293495 | 1.887139  |
| 66 | 1  | 0 | 4.441770  | 1.965006  | -1.714148 |
| 67 | 1  | 0 | 2.771220  | 2.085863  | -2.267621 |
| 68 | 1  | 0 | 3.227636  | 3.406601  | -0.152525 |
| 69 | 1  | 0 | 1.939528  | 2.234393  | 0.040639  |
| 70 | 1  | 0 | 4.847667  | 1.940038  | 0.995437  |
| 71 | 1  | 0 | 3.413127  | 2.100213  | 2.008107  |
| 72 | 8  | 0 | 1.927864  | -0.223677 | -1.447544 |
| 73 | 53 | 0 | 6.246573  | -0.463888 | -0.556054 |
| 74 | 6  | 0 | 1.625674  | -1.542465 | -1.980671 |
| 75 | 8  | 0 | 0.382633  | -1.762504 | -1.836747 |
| 76 | 8  | 0 | 2.529794  | -2.207798 | -2.452808 |

-----  
Zero-point correction= 0.616524 (Hartree/Particle)

Thermal correction to Energy= 0.655154

Thermal correction to Enthalpy= 0.656098

Thermal correction to Gibbs Free Energy= 0.542117

Sum of electronic and zero-point Energies= -1805.588456

Sum of electronic and thermal Energies= -1805.549825

Sum of electronic and thermal Enthalpies= -1805.548881

Sum of electronic and thermal Free Energies= -1805.662862

M06 /6-311++G(d,p)-SDD //B3LYP /6-31G(d)-LANL2DZ energy in dichloromethane solvent = -2209.8818

### 1-ts3

-----

| Center<br>Number | Atomic<br>Number | Atomic<br>Type | Coordinates (Angstroms) |           |           |
|------------------|------------------|----------------|-------------------------|-----------|-----------|
|                  |                  |                | X                       | Y         | Z         |
| 1                | 57               | 0              | 0.970184                | -0.022832 | -0.507163 |
| 2                | 8                | 0              | 0.140206                | 0.253231  | 1.678625  |
| 3                | 8                | 0              | 1.484471                | -2.304869 | -0.082448 |
| 4                | 8                | 0              | 0.779923                | 2.105115  | -1.581602 |
| 5                | 7                | 0              | 3.874197                | -0.432657 | -0.211034 |
| 6                | 7                | 0              | 2.507289                | 2.112545  | 0.987633  |
| 7                | 7                | 0              | 2.491649                | -0.486465 | -2.967052 |
| 8                | 6                | 0              | 3.824586                | 1.567544  | 1.354510  |
| 9                | 1                | 0              | 3.687527                | 0.906245  | 2.212587  |
| 10               | 1                | 0              | 4.501524                | 2.377498  | 1.691230  |
| 11               | 6                | 0              | 1.522370                | 1.435474  | 3.224053  |
| 12               | 6                | 0              | 0.986430                | -0.540197 | 5.141391  |
| 13               | 1                | 0              | 0.772938                | -1.310597 | 5.880174  |

|    |   |   |           |           |           |
|----|---|---|-----------|-----------|-----------|
| 14 | 6 | 0 | 3.118119  | -5.566739 | -0.092442 |
| 15 | 1 | 0 | 2.878594  | -6.604328 | -0.318947 |
| 16 | 6 | 0 | 0.675581  | 0.342457  | 2.882163  |
| 17 | 6 | 0 | 0.093983  | 6.045088  | -0.443695 |
| 18 | 6 | 0 | 1.202678  | 5.345042  | 0.035945  |
| 19 | 1 | 0 | 1.898941  | 5.837298  | 0.714653  |
| 20 | 6 | 0 | 3.715581  | -2.891685 | 0.492411  |
| 21 | 6 | 0 | 0.423435  | -0.636966 | 3.872694  |
| 22 | 6 | 0 | 4.529548  | 0.820383  | 0.222352  |
| 23 | 1 | 0 | 4.619223  | 1.473638  | -0.649536 |
| 24 | 1 | 0 | 5.562660  | 0.601135  | 0.552667  |
| 25 | 6 | 0 | 2.400906  | -3.231693 | 0.055687  |
| 26 | 6 | 0 | -0.780671 | 5.397490  | -1.323319 |
| 27 | 1 | 0 | -1.649641 | 5.926395  | -1.711123 |
| 28 | 6 | 0 | 0.559922  | 3.353898  | -1.224307 |
| 29 | 6 | 0 | 2.133900  | -4.593695 | -0.232415 |
| 30 | 6 | 0 | 1.450934  | 4.020571  | -0.336307 |
| 31 | 6 | 0 | 2.075460  | 1.508399  | 4.507660  |
| 32 | 1 | 0 | 2.715080  | 2.356302  | 4.752816  |
| 33 | 6 | 0 | 1.819303  | 0.534311  | 5.474042  |
| 34 | 6 | 0 | -0.553776 | 4.080416  | -1.711632 |
| 35 | 6 | 0 | 2.699354  | 3.305357  | 0.109883  |
| 36 | 1 | 0 | 3.237209  | 2.962592  | -0.781244 |
| 37 | 1 | 0 | 3.357984  | 4.023888  | 0.633382  |
| 38 | 6 | 0 | 1.757025  | 2.526997  | 2.212834  |
| 39 | 1 | 0 | 0.800361  | 2.922259  | 1.859045  |
| 40 | 1 | 0 | 2.295202  | 3.362026  | 2.698609  |
| 41 | 6 | 0 | 4.687650  | -3.889543 | 0.620576  |
| 42 | 1 | 0 | 5.685045  | -3.609102 | 0.959016  |
| 43 | 6 | 0 | 4.022712  | -1.466423 | 0.875302  |
| 44 | 1 | 0 | 3.358405  | -1.158360 | 1.691638  |
| 45 | 1 | 0 | 5.055050  | -1.421019 | 1.263833  |
| 46 | 6 | 0 | 4.407097  | -5.226927 | 0.335132  |
| 47 | 6 | 0 | 4.485065  | -0.879913 | -1.483554 |
| 48 | 1 | 0 | 4.337560  | -1.956964 | -1.566175 |
| 49 | 1 | 0 | 5.577942  | -0.717146 | -1.467280 |
| 50 | 6 | 0 | 2.297764  | -1.881622 | -3.400577 |
| 51 | 1 | 0 | 2.627051  | -2.581548 | -2.631302 |
| 52 | 1 | 0 | 2.850231  | -2.088511 | -4.335929 |
| 53 | 1 | 0 | 1.231559  | -2.047069 | -3.565587 |
| 54 | 6 | 0 | 3.908586  | -0.180589 | -2.716323 |
| 55 | 1 | 0 | 3.992770  | 0.907525  | -2.610690 |
| 56 | 1 | 0 | 4.528640  | -0.459341 | -3.590986 |
| 57 | 6 | 0 | 1.959891  | 0.417345  | -4.003257 |
| 58 | 1 | 0 | 0.909780  | 0.173898  | -4.175064 |
| 59 | 1 | 0 | 2.518749  | 0.313217  | -4.951573 |
| 60 | 1 | 0 | 2.011066  | 1.449694  | -3.651338 |
| 61 | 1 | 0 | -0.083303 | 7.073166  | -0.139084 |
| 62 | 1 | 0 | -1.226236 | 3.574465  | -2.399743 |
| 63 | 1 | 0 | 2.257470  | 0.612471  | 6.465699  |
| 64 | 1 | 0 | -0.226102 | -1.466827 | 3.608035  |
| 65 | 1 | 0 | 1.130124  | -4.851506 | -0.559511 |
| 66 | 1 | 0 | 5.175623  | -5.987305 | 0.445934  |
| 67 | 6 | 0 | -4.865779 | 0.457578  | -1.719342 |
| 68 | 6 | 0 | -4.250564 | -0.766595 | -1.090120 |
| 69 | 6 | 0 | -3.162859 | -0.602548 | -0.020857 |
| 70 | 6 | 0 | -3.350625 | 0.628449  | 0.873153  |
| 71 | 6 | 0 | -3.714688 | 1.879487  | 0.060631  |
| 72 | 6 | 0 | -4.991662 | 1.661793  | -0.763610 |



|    |    |   |           |           |           |
|----|----|---|-----------|-----------|-----------|
| 73 | 1  | 0 | -3.094256 | -1.516282 | 0.572625  |
| 74 | 1  | 0 | -4.582235 | -1.748492 | -1.365828 |
| 75 | 1  | 0 | -4.206302 | 0.735605  | -2.552546 |
| 76 | 1  | 0 | -5.835719 | 0.195808  | -2.150855 |
| 77 | 1  | 0 | -4.142577 | 0.403504  | 1.592897  |
| 78 | 1  | 0 | -2.415895 | 0.772789  | 1.425294  |
| 79 | 1  | 0 | -3.853548 | 2.725660  | 0.744999  |
| 80 | 1  | 0 | -2.879235 | 2.152183  | -0.598486 |
| 81 | 1  | 0 | -5.837596 | 1.487297  | -0.089888 |
| 82 | 1  | 0 | -5.221420 | 2.556305  | -1.357108 |
| 83 | 8  | 0 | -1.862581 | -0.424994 | -0.667338 |
| 84 | 53 | 0 | -6.393384 | -1.492005 | 0.711386  |
| 85 | 6  | 0 | -1.757510 | -0.853263 | -1.975269 |
| 86 | 8  | 0 | -2.821408 | -1.172409 | -2.552122 |
| 87 | 8  | 0 | -0.578337 | -0.837676 | -2.406070 |

-----  
Zero-point correction= 0.719220 (Hartree/Particle)  
Thermal correction to Energy= 0.762294  
Thermal correction to Enthalpy= 0.763238  
Thermal correction to Gibbs Free Energy= 0.638959  
Sum of electronic and zero-point Energies= -1978.731649  
Sum of electronic and thermal Energies= -1978.688575  
Sum of electronic and thermal Enthalpies= -1978.687630  
Sum of electronic and thermal Free Energies= -1978.811910

M06 /6-311++G(d,p)-SDD //B3LYP /6-31G(d)-LANL2DZ energy in dichloromethane solvent =-2383.0448

### b-ts3

-----

| Center<br>Number | Atomic<br>Number | Atomic<br>Type | Coordinates (Angstroms) |           |           |
|------------------|------------------|----------------|-------------------------|-----------|-----------|
|                  |                  |                | X                       | Y         | Z         |
| 1                | 57               | 0              | 0.795191                | 0.100404  | 0.329656  |
| 2                | 8                | 0              | 1.948448                | 0.933270  | 2.201288  |
| 3                | 8                | 0              | 0.663248                | -1.497534 | -1.402226 |
| 4                | 8                | 0              | 0.130213                | 2.009987  | -0.855196 |
| 5                | 7                | 0              | 3.054618                | 0.985053  | -1.108680 |
| 6                | 7                | 0              | 3.027719                | -1.530488 | 0.623728  |
| 7                | 6                | 0              | 3.856953                | 2.024108  | -0.440911 |
| 8                | 1                | 0              | 3.237740                | 2.903570  | -0.258188 |
| 9                | 1                | 0              | 4.225504                | 1.662549  | 0.519771  |
| 10               | 1                | 0              | 4.717150                | 2.326100  | -1.065078 |
| 11               | 6                | 0              | 3.867694                | -0.223430 | -1.371988 |
| 12               | 1                | 0              | 3.319633                | -0.846438 | -2.079952 |
| 13               | 1                | 0              | 4.817954                | 0.061461  | -1.862748 |
| 14               | 6                | 0              | 4.211715                | -1.045786 | -0.122677 |
| 15               | 1                | 0              | 4.809090                | -0.440767 | 0.562919  |
| 16               | 6                | 0              | 3.282406                | -1.618322 | 2.103722  |
| 17               | 1                | 0              | 2.315925                | -1.882067 | 2.553810  |
| 18               | 6                | 0              | 5.607137                | 0.612354  | 4.149619  |
| 19               | 6                | 0              | 4.870681                | 1.800882  | 4.203246  |
| 20               | 1                | 0              | 5.258026                | 2.655706  | 4.754864  |
| 21               | 6                | 0              | 3.643869                | 1.904484  | 3.555871  |
| 22               | 6                | 0              | 3.101348                | 0.818470  | 2.826796  |
| 23               | 6                | 0              | 2.586777                | -2.900321 | 0.194972  |
| 24               | 1                | 0              | 3.327233                | -3.630097 | 0.565511  |
| 25               | 1                | 0              | 1.650750                | -3.093882 | 0.736398  |
| 26               | 6                | 0              | 2.382680                | -3.148118 | -1.279575 |
| 27               | 6                | 0              | 3.137310                | -4.122892 | -1.941046 |
| 28               | 6                | 0              | 2.915672                | -4.440854 | -3.282575 |

|    |    |   |           |           |           |
|----|----|---|-----------|-----------|-----------|
| 29 | 6  | 0 | 1.907915  | -3.763192 | -3.976542 |
| 30 | 1  | 0 | 1.716082  | -3.997831 | -5.022068 |
| 31 | 6  | 0 | 1.145080  | -2.785548 | -3.344404 |
| 32 | 6  | 0 | 1.362286  | -2.449024 | -1.987470 |
| 33 | 6  | 0 | 2.515613  | 1.486123  | -2.415210 |
| 34 | 1  | 0 | 3.349560  | 1.561697  | -3.134864 |
| 35 | 1  | 0 | 1.840605  | 0.702792  | -2.783350 |
| 36 | 6  | 0 | 1.805531  | 2.818975  | -2.368565 |
| 37 | 6  | 0 | 0.617266  | 2.986482  | -1.598738 |
| 38 | 6  | 0 | -0.033760 | 4.241865  | -1.650285 |
| 39 | 6  | 0 | 0.464629  | 5.286470  | -2.421320 |
| 40 | 1  | 0 | -0.063101 | 6.238447  | -2.437289 |
| 41 | 6  | 0 | 1.633969  | 5.122111  | -3.171284 |
| 42 | 6  | 0 | 2.286813  | 3.889659  | -3.131023 |
| 43 | 1  | 0 | 3.196467  | 3.745551  | -3.713283 |
| 44 | 1  | 0 | 3.910788  | -4.651263 | -1.384454 |
| 45 | 1  | 0 | 2.028339  | 5.935439  | -3.774764 |
| 46 | 1  | 0 | 3.513178  | -5.204303 | -3.773667 |
| 47 | 1  | 0 | 3.962477  | -2.466284 | 2.294546  |
| 48 | 6  | 0 | 3.849561  | -0.394802 | 2.780758  |
| 49 | 6  | 0 | 5.083876  | -0.468218 | 3.438277  |
| 50 | 1  | 0 | 5.641311  | -1.403597 | 3.396170  |
| 51 | 1  | 0 | 6.566136  | 0.527841  | 4.653790  |
| 52 | 1  | 0 | 4.845571  | -1.889792 | -0.438659 |
| 53 | 1  | 0 | -0.941690 | 4.360485  | -1.064827 |
| 54 | 1  | 0 | 0.362808  | -2.251079 | -3.876912 |
| 55 | 1  | 0 | 3.065086  | 2.823617  | 3.591979  |
| 56 | 6  | 0 | -4.515588 | -2.113500 | -0.031563 |
| 57 | 6  | 0 | -4.239670 | -1.030640 | 0.981632  |
| 58 | 6  | 0 | -3.322157 | 0.144436  | 0.616557  |
| 59 | 6  | 0 | -3.381885 | 0.546014  | -0.862471 |
| 60 | 6  | 0 | -3.351477 | -0.676757 | -1.791056 |
| 61 | 6  | 0 | -4.520895 | -1.626486 | -1.494802 |
| 62 | 1  | 0 | -3.545070 | 0.991552  | 1.267844  |
| 63 | 1  | 0 | -4.711802 | -1.052944 | 1.944645  |
| 64 | 1  | 0 | -3.716159 | -2.856578 | 0.090260  |
| 65 | 1  | 0 | -5.456218 | -2.611084 | 0.219247  |
| 66 | 1  | 0 | -4.302183 | 1.115367  | -1.019834 |
| 67 | 1  | 0 | -2.533264 | 1.210729  | -1.061138 |
| 68 | 1  | 0 | -3.403370 | -0.336393 | -2.832765 |
| 69 | 1  | 0 | -2.392549 | -1.203172 | -1.686329 |
| 70 | 1  | 0 | -5.468248 | -1.112050 | -1.690454 |
| 71 | 1  | 0 | -4.478777 | -2.502909 | -2.153990 |
| 72 | 8  | 0 | -1.926616 | -0.218315 | 0.871532  |
| 73 | 53 | 0 | -6.715381 | 0.453454  | 0.756282  |
| 74 | 6  | 0 | -1.700415 | -1.343875 | 1.655615  |
| 75 | 8  | 0 | -0.484436 | -1.559661 | 1.865574  |
| 76 | 8  | 0 | -2.715563 | -1.981801 | 2.011882  |

-----  
Zero-point correction= 0.615920 (Hartree/Particle)

Thermal correction to Energy= 0.654245

Thermal correction to Enthalpy= 0.655189

Thermal correction to Gibbs Free Energy= 0.540506

Sum of electronic and zero-point Energies= -1805.564552

Sum of electronic and thermal Energies= -1805.526228

Sum of electronic and thermal Enthalpies= -1805.525284

Sum of electronic and thermal Free Energies= -1805.639967

M06 /6-311++G(d,p)-SDD //B3LYP /6-31G(d)-LANL2DZ energy in dichloromethane solvent =-2209.8472

## 1-int4

| Center<br>Number | Atomic<br>Number | Atomic<br>Type | Coordinates (Angstroms) |           |           |
|------------------|------------------|----------------|-------------------------|-----------|-----------|
|                  |                  |                | X                       | Y         | Z         |
| 1                | 57               | 0              | 1.346572                | 0.039751  | 0.088873  |
| 2                | 8                | 0              | 2.488255                | 0.532191  | 2.055228  |
| 3                | 8                | 0              | 1.098454                | -2.250419 | 0.631189  |
| 4                | 8                | 0              | 0.998288                | 2.063311  | -1.119260 |
| 5                | 7                | 0              | 3.035506                | -1.573461 | -1.581650 |
| 6                | 7                | 0              | 3.944770                | 1.225721  | -0.566190 |
| 7                | 7                | 0              | 0.121346                | -0.872987 | -2.425042 |
| 8                | 6                | 0              | 4.822036                | 0.157766  | -1.081630 |
| 9                | 1                | 0              | 5.173771                | -0.426940 | -0.228627 |
| 10               | 1                | 0              | 5.723175                | 0.591680  | -1.555550 |
| 11               | 6                | 0              | 4.824659                | 0.938053  | 1.802654  |
| 12               | 6                | 0              | 5.300532                | -0.663576 | 4.055565  |
| 13               | 1                | 0              | 5.477737                | -1.285139 | 4.931234  |
| 14               | 6                | 0              | 1.002255                | -5.893833 | 0.453177  |
| 15               | 1                | 0              | 0.352718                | -6.713558 | 0.753954  |
| 16               | 6                | 0              | 3.725670                | 0.341354  | 2.482508  |
| 17               | 6                | 0              | 2.675907                | 5.864983  | -0.934994 |
| 18               | 6                | 0              | 3.469108                | 4.746520  | -1.194130 |
| 19               | 1                | 0              | 4.539758                | 4.869956  | -1.354775 |
| 20               | 6                | 0              | 2.662585                | -3.771380 | -0.313694 |
| 21               | 6                | 0              | 3.995847                | -0.456874 | 3.617746  |
| 22               | 6                | 0              | 4.151907                | -0.756459 | -2.108180 |
| 23               | 1                | 0              | 3.770213                | -0.159342 | -2.940426 |
| 24               | 1                | 0              | 4.928079                | -1.419692 | -2.532435 |
| 25               | 6                | 0              | 1.445569                | -3.490922 | 0.372727  |
| 26               | 6                | 0              | 1.301665                | 5.685301  | -0.740930 |
| 27               | 1                | 0              | 0.665779                | 6.545135  | -0.538477 |
| 28               | 6                | 0              | 1.526609                | 3.272773  | -1.058989 |
| 29               | 6                | 0              | 0.628146                | -4.585832 | 0.744170  |
| 30               | 6                | 0              | 2.922870                | 3.460580  | -1.258858 |
| 31               | 6                | 0              | 6.126906                | 0.712704  | 2.263640  |
| 32               | 1                | 0              | 6.956802                | 1.182230  | 1.735905  |
| 33               | 6                | 0              | 6.380895                | -0.081844 | 3.382701  |
| 34               | 6                | 0              | 0.733961                | 4.416520  | -0.804190 |
| 35               | 6                | 0              | 3.771265                | 2.270918  | -1.624676 |
| 36               | 1                | 0              | 3.319873                | 1.775631  | -2.491316 |
| 37               | 1                | 0              | 4.772992                | 2.622107  | -1.932483 |
| 38               | 6                | 0              | 4.559028                | 1.862287  | 0.642687  |
| 39               | 1                | 0              | 3.867619                | 2.653695  | 0.946361  |
| 40               | 1                | 0              | 5.503773                | 2.351691  | 0.344716  |
| 41               | 6                | 0              | 3.013385                | -5.095756 | -0.598339 |
| 42               | 1                | 0              | 3.949136                | -5.290317 | -1.121860 |
| 43               | 6                | 0              | 3.591703                | -2.639072 | -0.668744 |
| 44               | 1                | 0              | 3.912229                | -2.127263 | 0.247677  |
| 45               | 1                | 0              | 4.498536                | -3.059714 | -1.135063 |
| 46               | 6                | 0              | 2.198674                | -6.164172 | -0.221278 |
| 47               | 6                | 0              | 2.278161                | -2.155347 | -2.716291 |
| 48               | 1                | 0              | 1.783877                | -3.059434 | -2.360578 |
| 49               | 1                | 0              | 2.969326                | -2.474026 | -3.516059 |
| 50               | 6                | 0              | -0.755047               | -2.039688 | -2.204409 |
| 51               | 1                | 0              | -0.222815               | -2.841919 | -1.692576 |
| 52               | 1                | 0              | -1.157682               | -2.422785 | -3.158974 |
| 53               | 1                | 0              | -1.592877               | -1.737706 | -1.571772 |
| 54               | 6                | 0              | 1.246470                | -1.200141 | -3.320238 |

|    |    |   |           |           |           |
|----|----|---|-----------|-----------|-----------|
| 55 | 1  | 0 | 1.722712  | -0.253183 | -3.601199 |
| 56 | 1  | 0 | 0.871543  | -1.652069 | -4.258648 |
| 57 | 6  | 0 | -0.673046 | 0.217103  | -3.025992 |
| 58 | 1  | 0 | -1.527663 | 0.433733  | -2.381856 |
| 59 | 1  | 0 | -1.047693 | -0.065806 | -4.025811 |
| 60 | 1  | 0 | -0.063469 | 1.119835  | -3.093971 |
| 61 | 1  | 0 | 3.119371  | 6.855789  | -0.885751 |
| 62 | 1  | 0 | -0.333406 | 4.272170  | -0.658108 |
| 63 | 1  | 0 | 7.399948  | -0.241796 | 3.724815  |
| 64 | 1  | 0 | 3.150888  | -0.903640 | 4.134344  |
| 65 | 1  | 0 | -0.298014 | -4.369719 | 1.269729  |
| 66 | 1  | 0 | 2.490278  | -7.185930 | -0.448372 |
| 67 | 6  | 0 | -4.474247 | 2.065481  | -0.570040 |
| 68 | 6  | 0 | -4.317065 | 0.655606  | 0.006112  |
| 69 | 6  | 0 | -4.430172 | 0.551284  | 1.530607  |
| 70 | 6  | 0 | -5.392055 | 1.503506  | 2.220033  |
| 71 | 6  | 0 | -5.434378 | 2.906319  | 1.598779  |
| 72 | 6  | 0 | -5.649843 | 2.811321  | 0.081552  |
| 73 | 1  | 0 | -4.651012 | -0.481259 | 1.817743  |
| 74 | 1  | 0 | -4.978517 | -0.067849 | -0.473662 |
| 75 | 1  | 0 | -3.548022 | 2.629569  | -0.389535 |
| 76 | 1  | 0 | -4.600981 | 1.994528  | -1.656055 |
| 77 | 1  | 0 | -6.378322 | 1.032853  | 2.117102  |
| 78 | 1  | 0 | -5.146970 | 1.536673  | 3.288781  |
| 79 | 1  | 0 | -6.245742 | 3.477985  | 2.065422  |
| 80 | 1  | 0 | -4.501065 | 3.449407  | 1.808908  |
| 81 | 1  | 0 | -6.584666 | 2.274953  | -0.125733 |
| 82 | 1  | 0 | -5.732419 | 3.811565  | -0.361825 |
| 83 | 8  | 0 | -3.027672 | 0.800320  | 1.938932  |
| 84 | 53 | 0 | -7.728977 | -0.950393 | 0.061709  |
| 85 | 6  | 0 | -2.242076 | 0.462400  | 0.926256  |
| 86 | 8  | 0 | -2.918798 | 0.217053  | -0.196702 |
| 87 | 8  | 0 | -1.021816 | 0.382633  | 1.011459  |

-----  
Zero-point correction= 0.722040 (Hartree/Particle)

Thermal correction to Energy= 0.765445

Thermal correction to Enthalpy= 0.766389

Thermal correction to Gibbs Free Energy= 0.638450

Sum of electronic and zero-point Energies= -1978.762026

Sum of electronic and thermal Energies= -1978.718621

Sum of electronic and thermal Enthalpies= -1978.717676

Sum of electronic and thermal Free Energies= -1978.845616

M06 /6-311++G(d,p)-SDD //B3LYP /6-31G(d)-LANL2DZ energy in dichloromethane solvent = -2383.0707

## b-int4

-----

| Center<br>Number | Atomic<br>Number | Atomic<br>Type | Coordinates (Angstroms) |           |           |
|------------------|------------------|----------------|-------------------------|-----------|-----------|
|                  |                  |                | X                       | Y         | Z         |
| 1                | 57               | 0              | 0.894895                | 0.102230  | 0.090282  |
| 2                | 8                | 0              | 1.433674                | 1.135888  | 2.114533  |
| 3                | 8                | 0              | 1.210710                | -1.700986 | -1.374417 |
| 4                | 8                | 0              | 0.527914                | 1.835639  | -1.404792 |
| 5                | 7                | 0              | 3.405194                | 0.936452  | -0.783053 |
| 6                | 7                | 0              | 2.988324                | -1.381843 | 1.157143  |
| 7                | 6                | 0              | 3.963155                | 2.081297  | -0.039640 |
| 8                | 1                | 0              | 3.296512                | 2.939459  | -0.135827 |
| 9                | 1                | 0              | 4.056520                | 1.838967  | 1.019572  |
| 10               | 1                | 0              | 4.955236                | 2.364064  | -0.433014 |

|    |   |   |           |           |           |
|----|---|---|-----------|-----------|-----------|
| 11 | 6 | 0 | 4.295425  | -0.243745 | -0.683044 |
| 12 | 1 | 0 | 3.974730  | -0.967533 | -1.433859 |
| 13 | 1 | 0 | 5.332077  | 0.046455  | -0.936871 |
| 14 | 6 | 0 | 4.316139  | -0.909432 | 0.698724  |
| 15 | 1 | 0 | 4.690538  | -0.203149 | 1.442926  |
| 16 | 6 | 0 | 2.847040  | -1.309115 | 2.653926  |
| 17 | 1 | 0 | 1.807382  | -1.592656 | 2.865717  |
| 18 | 6 | 0 | 4.449045  | 1.262805  | 4.973141  |
| 19 | 6 | 0 | 3.673928  | 2.395823  | 4.702901  |
| 20 | 1 | 0 | 3.862526  | 3.323761  | 5.239251  |
| 21 | 6 | 0 | 2.660125  | 2.350526  | 3.751232  |
| 22 | 6 | 0 | 2.382058  | 1.164565  | 3.032590  |
| 23 | 6 | 0 | 2.722791  | -2.813039 | 0.785315  |
| 24 | 1 | 0 | 3.370723  | -3.453605 | 1.407417  |
| 25 | 1 | 0 | 1.687926  | -3.013276 | 1.094603  |
| 26 | 6 | 0 | 2.908244  | -3.215810 | -0.656535 |
| 27 | 6 | 0 | 3.844174  | -4.197170 | -1.001104 |
| 28 | 6 | 0 | 3.978294  | -4.655240 | -2.313096 |
| 29 | 6 | 0 | 3.149905  | -4.116663 | -3.302989 |
| 30 | 1 | 0 | 3.236063  | -4.463203 | -4.331041 |
| 31 | 6 | 0 | 2.213168  | -3.136147 | -2.988243 |
| 32 | 6 | 0 | 2.072225  | -2.658913 | -1.665368 |
| 33 | 6 | 0 | 3.237438  | 1.277220  | -2.235813 |
| 34 | 1 | 0 | 4.236425  | 1.324994  | -2.701961 |
| 35 | 1 | 0 | 2.711402  | 0.425466  | -2.686557 |
| 36 | 6 | 0 | 2.510541  | 2.567827  | -2.531183 |
| 37 | 6 | 0 | 1.161905  | 2.754732  | -2.114535 |
| 38 | 6 | 0 | 0.512484  | 3.956732  | -2.475986 |
| 39 | 6 | 0 | 1.167299  | 4.936850  | -3.214521 |
| 40 | 1 | 0 | 0.638512  | 5.851192  | -3.476611 |
| 41 | 6 | 0 | 2.494239  | 4.755863  | -3.618277 |
| 42 | 6 | 0 | 3.146848  | 3.573662  | -3.267953 |
| 43 | 1 | 0 | 4.179334  | 3.418036  | -3.578824 |
| 44 | 1 | 0 | 4.473950  | -4.617579 | -0.217841 |
| 45 | 1 | 0 | 3.010068  | 5.519719  | -4.193851 |
| 46 | 1 | 0 | 4.710321  | -5.420453 | -2.556551 |
| 47 | 1 | 0 | 3.485082  | -2.087509 | 3.105459  |
| 48 | 6 | 0 | 3.164876  | 0.008795  | 3.315300  |
| 49 | 6 | 0 | 4.182345  | 0.084693  | 4.274973  |
| 50 | 1 | 0 | 4.770307  | -0.808483 | 4.483659  |
| 51 | 1 | 0 | 5.241506  | 1.295122  | 5.715836  |
| 52 | 1 | 0 | 5.034220  | -1.743862 | 0.660803  |
| 53 | 1 | 0 | -0.517822 | 4.088502  | -2.156889 |
| 54 | 1 | 0 | 1.567736  | -2.709133 | -3.751170 |
| 55 | 1 | 0 | 2.052460  | 3.224895  | 3.534618  |
| 56 | 6 | 0 | -4.203074 | -2.399593 | -0.691782 |
| 57 | 6 | 0 | -4.063905 | -1.386310 | 0.446571  |
| 58 | 6 | 0 | -3.513125 | -0.012402 | 0.042140  |
| 59 | 6 | 0 | -3.875168 | 0.504101  | -1.338545 |
| 60 | 6 | 0 | -3.940167 | -0.585834 | -2.417140 |
| 61 | 6 | 0 | -4.817348 | -1.753901 | -1.944644 |
| 62 | 1 | 0 | -3.760178 | 0.730594  | 0.805527  |
| 63 | 1 | 0 | -4.986117 | -1.266668 | 1.018113  |
| 64 | 1 | 0 | -3.207953 | -2.792904 | -0.944396 |
| 65 | 1 | 0 | -4.804586 | -3.245611 | -0.342022 |
| 66 | 1 | 0 | -4.869787 | 0.952062  | -1.215104 |
| 67 | 1 | 0 | -3.177646 | 1.306527  | -1.608357 |
| 68 | 1 | 0 | -4.347022 | -0.148727 | -3.336739 |
| 69 | 1 | 0 | -2.931369 | -0.950995 | -2.659935 |

|    |    |   |           |           |           |
|----|----|---|-----------|-----------|-----------|
| 70 | 1  | 0 | -5.826075 | -1.389094 | -1.712486 |
| 71 | 1  | 0 | -4.908901 | -2.512956 | -2.731430 |
| 72 | 8  | 0 | -2.049742 | -0.260827 | 0.174512  |
| 73 | 53 | 0 | -7.286923 | 0.511862  | 0.767842  |
| 74 | 6  | 0 | -1.878437 | -1.264960 | 1.056430  |
| 75 | 8  | 0 | -0.762778 | -1.543582 | 1.478592  |
| 76 | 8  | 0 | -3.006737 | -1.866601 | 1.372879  |

-----

Zero-point correction= 0.618573 (Hartree/Particle)  
 Thermal correction to Energy= 0.657208  
 Thermal correction to Enthalpy= 0.658152  
 Thermal correction to Gibbs Free Energy= 0.539666  
 Sum of electronic and zero-point Energies= -1805.589412  
 Sum of electronic and thermal Energies= -1805.550777  
 Sum of electronic and thermal Enthalpies= -1805.549833  
 Sum of electronic and thermal Free Energies= -1805.668319

M06 /6-311++G(d,p)-SDD //B3LYP /6-31G(d)-LANL2DZ energy in dichloromethane solvent = -2209.8705

### ***cis-4d***

-----

| Center<br>Number | Atomic<br>Number | Atomic<br>Type | Coordinates (Angstroms)<br>X Y Z |           |           |
|------------------|------------------|----------------|----------------------------------|-----------|-----------|
| 1                | 6                | 0              | 0.813101                         | 1.475387  | -0.225315 |
| 2                | 6                | 0              | -0.037604                        | 0.743951  | 0.822761  |
| 3                | 6                | 0              | 0.048611                         | -0.789043 | 0.761464  |
| 4                | 6                | 0              | 1.400645                         | -1.386664 | 0.391848  |
| 5                | 6                | 0              | 2.141846                         | -0.609215 | -0.703845 |
| 6                | 6                | 0              | 2.224179                         | 0.881435  | -0.347906 |
| 7                | 1                | 0              | -0.306226                        | -1.220995 | 1.706597  |
| 8                | 1                | 0              | 0.156020                         | 1.120182  | 1.830534  |
| 9                | 1                | 0              | 0.308737                         | 1.387410  | -1.195776 |
| 10               | 1                | 0              | 0.842835                         | 2.543303  | 0.017132  |
| 11               | 1                | 0              | 2.010028                         | -1.390857 | 1.306621  |
| 12               | 1                | 0              | 1.252180                         | -2.435704 | 0.111530  |
| 13               | 1                | 0              | 3.144334                         | -1.032794 | -0.834926 |
| 14               | 1                | 0              | 1.618940                         | -0.727850 | -1.661829 |
| 15               | 1                | 0              | 2.776003                         | 1.007954  | 0.595503  |
| 16               | 1                | 0              | 2.785339                         | 1.431117  | -1.112190 |
| 17               | 8                | 0              | -0.957466                        | -1.083358 | -0.238264 |
| 18               | 6                | 0              | -1.891126                        | -0.089609 | -0.210946 |
| 19               | 8                | 0              | -1.441716                        | 0.955043  | 0.543982  |
| 20               | 8                | 0              | -2.949081                        | -0.126587 | -0.767163 |

-----

Zero-point correction= 0.169598 (Hartree/Particle)  
 Thermal correction to Energy= 0.177454  
 Thermal correction to Enthalpy= 0.178398  
 Thermal correction to Gibbs Free Energy= 0.136835  
 Sum of electronic and zero-point Energies= -498.290831  
 Sum of electronic and thermal Energies= -498.282975  
 Sum of electronic and thermal Enthalpies= -498.282031  
 Sum of electronic and thermal Free Energies= -498.323595

M06 /6-311++G(d,p)-SDD //B3LYP /6-31G(d)-LANL2DZ energy in dichloromethane solvent = -498.29066

## 6. References

- 1 D. G. Gusev, Dehydrogenative coupling of ethanol and ester hydrogenation catalyzed by pincer-type YNP complexes, *ACS Catal.*, 2016, **6**, 6967–6981.
- 2 X. Xin, H. Shan, T. Tian, Y. Wang, D. Yuan, H. You and Y. Yao, Conversion of CO<sub>2</sub> into cyclic carbonates under ambient conditions catalyzed by rare-earth metal complexes bearing poly(phenolato) ligand, *ACS Sustainable Chem. Eng.*, 2020, **8**, 13185–13194.
- 3 J. Steinbauer, A. Spannenberg and T. Werner, An in situ formed Ca<sup>2+</sup>-crown ether complex and its use in CO<sub>2</sub>-fixation reactions with terminal and internal epoxides, *Green Chem.*, 2017, **19**, 3769–3779.
- 4 J. A. Castro-Osma, K. J. Lamb and M. North, Cr(salophen) complex catalyzed cyclic carbonate synthesis at ambient temperature and pressure, *ACS Catal.*, 2016, **6**, 5012–5025.
- 5 H. Vignesh Babu and K. Muralidharan, Zn(II), Cd(II) and Cu(II) complexes of 2,5-bis{N-(2,6-diisopropylphenyl)iminomethyl}pyrrole: synthesis, structures and their high catalytic activity for efficient cyclic carbonate synthesis, *Dalton Trans.*, 2013, **42**, 1238–1248.
- 6 Y. Kim, K. Hyun, D. Ahn, R. Kim, M. H. Park and Y. Kim, Efficient aluminum catalysts for the chemical conversion of CO<sub>2</sub> into cyclic carbonates at room temperature and atmospheric CO<sub>2</sub> pressure, *ChemSusChem*, 2019, **12**, 4211–4220.
- 7 N. Liu, Y. F. Xie, C. Wang, S. J. Li, D. Wei, M. Li and B. Dai, Cooperative multifunctional organocatalysts for ambient conversion of carbon dioxide into cyclic carbonates, *ACS Catal.*, 2018, **8**, 9945–9957.
- 8 Z. Guo, Y. Hu, S. Dong, L. Chen, L. Ma, Y. Zhou, L. Wang and J. Wang, “Spring-loaded” mechanism for chemical fixation of carbon dioxide with epoxides, *Chem Catalysis*, 2022, **2**, 519-530.

- 9 L. Wang, G. Zhang, K. Kodama and T. Hirose, An efficient metal- and solvent-free organocatalytic system for chemical fixation of CO<sub>2</sub> into cyclic carbonates under mild conditions, *Green Chem.*, 2016, **18**, 1229–1233.
- 10 D. O. Meléndez, A. Lara-Sánchez, J. Martínez, X. Wu, A. Otero, J. A. Castro-Osma, M. North and R. S. Rojas, Amidinate aluminium complexes as catalysts for carbon dioxide fixation into cyclic carbonates, *ChemCatChem*, 2018, **10**, 2271–2277.
- 11 W. Clegg, R. W. Harrington, M. North and R. Pasquale, Cyclic carbonate synthesis catalysed by bimetallic aluminium–salen complexes, *Chem. Eur. J.*, 2010, **16**, 6828–6843.
- 12 M. A. Gaona, F. De La Cruz-Martínez, J. Fernández-Baeza, L. F. Sánchez-Barba, C. Alonso-Moreno, A. M. Rodríguez, A. Rodríguez-Diéguez, J. A. Castro-Osma, A. Otero and A. Lara-Sánchez, Synthesis of helical aluminium catalysts for cyclic carbonate formation, *Dalton Trans.*, 2019, **48**, 4218–4227.
- 13 J. A. Castro-Osma, C. Alonso-Moreno, A. Lara-Sánchez, J. Martínez, M. North and A. Otero, Synthesis of cyclic carbonates catalysed by aluminium heteroscorpionate complexes, *Catal. Sci. Technol.*, 2014, **4**, 1674–1684.
- 14 M. Navarro, L. F. Sánchez-Barba, A. Garcés, J. Fernández-Baeza, I. Fernández, A. Lara-Sánchez and A. M. Rodríguez, Bimetallic scorpionate-based helical organoaluminum complexes for efficient carbon dioxide fixation into a variety of cyclic carbonates, *Catal. Sci. Technol.*, 2020, **10**, 3265–3278.
- 15 M. A. Emelyanov, N. V. Stoletova, A. A. Lisov, M. G. Medvedev, A. F. Smol'Yakov, V. I. Maleev and V. A. Larionov, An octahedral cobalt(III) complex based on cheap 1,2-phenylenediamine as a bifunctional metal-templated hydrogen bond donor catalyst for fixation of CO<sub>2</sub> with epoxides under ambient conditions, *Inorg. Chem. Front.*, 2021, **8**, 3871–3884.
- 16 L. Qu, I. Del Rosal, Q. Li, Y. Wang, D. Yuan, Y. Yao and L. Maron, Efficient CO<sub>2</sub> transformation under ambient condition by heterobimetallic rare earth complexes: experimental and computational evidences of a synergistic effect, *J. CO<sub>2</sub> Util.*, 2019, **33**, 413–418.



- 17 P. Gao, Z. Zhao, L. Chen, D. Yuan and Y. Yao, Dinuclear aluminum poly(phenolate) complexes as efficient catalysts for cyclic carbonate synthesis, *Organometallics*, 2016, **35**, 1707–1712.
- 18 Y. Hao, D. Yuan and Y. Yao, Metal-free cycloaddition of epoxides and carbon dioxide catalysed by triazole-bridged bisphenol, *ChemCatChem*, 2020, **12**, 4346–4351.
- 19 (a) C. Lee, W. Yang, R. G. Parr, Development of the Colle-Salvetti correlation-energy formula into a functional of the electron density, *Phys. Rev. B Condens. Matter Mater.*, 1988, **37**, 785–789; (b) B. Miehlich, A. Savin, H. Stoll, H. Preuss, Results obtained with the correlation energy density functionals of Becke and Lee, Yang and Parr, *Chem. Phys. Lett.*, 1989, **157**, 200–206; (c) A. D. Becke, Density-functional thermochemistry. III. The role of exact exchange, *J. Chem. Phys.*, 1993, **98**, 5648–5652.
- 20 (a) P. J. Hay, W. R. Wadt, Ab initio effective core potentials for molecular calculations. Potentials for K to Au including the outermost core orbitals, *J. Chem. Phys.*, 1985, **82**, 299–310; (b) P. J. Hay, W. R. Wadt, Ab initio effective core potentials for molecular calculations. Potentials for the transition metal atoms Sc to Hg, *J. Chem. Phys.*, 1985, **82**, 270–283; (c) W. R. Wadt, P. J. Hay, Ab initio effective core potentials for molecular calculations. Potentials for main group elements Na to Bi, *J. Chem. Phys.*, 1985, **82**, 284–298.
- 21 P. C. Hariharan, J. A. Pople, The influence of polarization functions on molecular orbital hydrogenation energies, *Theor. Chim. Acta.*, 1973, **28**, 213–222.
- 22 (a) K. Fukui, A formulation of the reaction coordinate, *J. Phys. Chem. A*, 1970, **74**, 4161–4163; (b) K. Fukui, The path of chemical reactions - the IRC approach, *Acc. Chem. Res.*, 1981, **14**, 363–368.
- 23 (a) Y. Zhao, D. G. Truhlar, Density functionals with broad applicability in chemistry. *Acc. Chem. Res.*, 2008, **41**, 157–167; (b) Y. Zhao, D. G. Truhlar, The M06 suite of density functionals for main group thermochemistry, thermochemical kinetics, noncovalent interactions, excited states, and

- transition elements: two new functionals and systematic testing of four Mo6-class functionals and 12 other functionals, *Theor. Chem. Acc.*, 2008, **120**, 215–241; (c) Y. Zhao, D. G. Truhlar, Benchmark energetic data in a model system for grubbs II metathesis catalysis and their use for the development, assessment, and validation of electronic structure methods. *J. Chem. Theory Comput.*, 2009, **5**, 324–333.
- 24 D. Andrae, U. Häußermann, M. Dolg, H. Stoll, H. Preuß, Energy-adjusted ab initio pseudopotentials for the second and third row transition elements. *Theor. Chim. Acta.*, 1990, **77**, 123–141.
- 25 M. J. Frisch, G. W. Trucks, H. B. Schlegel, G. E. Scuseria, M. A. Robb, JR. Cheeseman, G. Scalmani, V. Barone, B. Mennucci, G. A. Petersson, H. Nakatsuji, M. Caricato, X. Li, H. P. Hratchian, A. F. Izmaylov, J. Bloino, G. Zheng, J. L. Sonnenberg, M. Hada, M. Ehara, K. Toyota, R. Fukuda, J. Hasegawa, M. Ishida, T. Nakajima, Y. Honda, O. Kitao, H. Nakai, T. Vreven, J. A. Montgomery, J. E. Peralta, F. Ogliaro, M. Bearpark, J. J. Heyd, E. Brothers, K. N. Kudin, V. N. Staroverov, T. Keith, R. Kobayashi, J. Normand, K. Raghavachari, A. Rendell, J. C. Burant, S. S. Iyengar, J. Tomasi, M. Cossi, N. Rega, J. M. Millam, M. Klene, J. E. Knox, J. B. Cross, V. Bakken, C. Adamo, J. Jaramillo, R. Gomperts, R. E. Stratmann, O. Yazyev, A. J. Austin, R. Cammi, C. Pomelli, J. W. Ochterski, R. L. Martin, K. Morokuma, V. G. Zakrzewski, G. A. Voth, P. Salvador, J. J. Dannenberg, S. Dapprich, A. D. Daniels, O. Farkas, J. B. Foresman, J. V. Ortiz, J. Cioslowski, D. J. Fox, Gaussian 09, Revision C.01; Gaussian, Inc., Wallingford, CT, 2013.
- 26 C. Y. Legault, CYLview, 1.0b; Université de Sherbrooke: Sherbrooke, Quebec, Canada, 2009. <http://www.Cylview.org>.
